# Supplementary material for: N-(diisopropylphosphanyl)benzamide
Source: Preprints.org preprint supplement (doi:10.20944/preprints202305.2256.v1), 2023-05-31

checkCIF (basic structural check) running

Checking for embedded fcf data in CIF ...  
Found embedded fcf data in CIF. Extracting fcf data from uploaded CIF, please wait ..

checkCIF/PLATON (basic structural check)

Structure factors have been supplied for datablock(s) 1

THIS REPORT IS FOR GUIDANCE ONLY. IF USED AS PART OF A REVIEW PROCEDURE FOR PUBLICATION, IT SHOULD NOT REPLACE THE EXPERTISE OF AN EXPERIENCED CRYSTALLOGRAPHIC REFEREE.

No syntax errors found. [CIF dictionary](#)  
Please wait while processing .... [Interpreting this report](#)

[Structure factor report](#)

Datablock: 1

|                               |                                          |                    |
|-------------------------------|------------------------------------------|--------------------|
| Bond precision:               | C-C = 0.0078 A                           | Wavelength=0.71073 |
| Cell:                         | a=15.482(3)                              | b=8.741(2)         |
|                               | alpha=90                                 | beta=98.382(10)    |
|                               |                                          | gamma=90           |
| Temperature: 193 K            |                                          |                    |
|                               | Calculated                               | Reported           |
| Volume                        | 1373.6(5)                                | 1373.7(5)          |
| Space group                   | P 21/c                                   | P 21/c             |
| Hall group                    | -P 2ybc                                  | -P 2ybc            |
| Moiety formula                | C13 H20 N O P                            | C13 H20 N O P      |
| Sum formula                   | C13 H20 N O P                            | C13 H20 N O P      |
| Mr                            | 237.27                                   | 237.27             |
| Dx,g cm-3                     | 1.147                                    | 1.147              |
| Z                             | 4                                        | 4                  |
| Mu (mm-1)                     | 0.182                                    | 0.182              |
| F000                          | 512.0                                    | 512.0              |
| F000'                         | 512.58                                   |                    |
| h,k,lmax                      | 18,10,12                                 | 18,10,12           |
| Nref                          | 2491                                     | 2489               |
| Tmin,Tmax                     | 0.983,0.991                              | 0.652,0.746        |
| Tmin'                         | 0.982                                    |                    |
| Correction method= #          | Reported T Limits: Tmin=0.652 Tmax=0.746 |                    |
| AbsCorr = MULTI-SCAN          |                                          |                    |
| Data completeness= 0.999      | Theta(max)= 25.245                       |                    |
| R(reflections)= 0.0864( 1754) | wR2(reflections)= 0.2003( 2489)          |                    |
| S = 1.113                     | Npar= 183                                |                    |

The following ALERTS were generated. Each ALERT has the format  
[test-name\\_ALERT\\_alert-type\\_alert-level](#).  
Click on the hyperlinks for more details of the test.

Alert level C

- PLAT340\_ALERT\_3\_C Low Bond Precision on C-C Bonds ..... 0.00775 Ang.
- PLAT906\_ALERT\_3\_C Large K Value in the Analysis of Variance ..... 18.333 Check
- PLAT906\_ALERT\_3\_C Large K Value in the Analysis of Variance ..... 3.057 Check
- PLAT911\_ALERT\_3\_C Missing FCF Refl Between Thmin & STh/L= 0.600 2 Report

Alert level G

- PLAT002\_ALERT\_2\_G Number of Distance or Angle Restraints on AtSite 9 Note
- PLAT003\_ALERT\_2\_G Number of Uiso or Uij Restrained non-H Atoms ... 12 Report
- PLAT083\_ALERT\_2\_G SHELXL Second Parameter in WGHT Unusually Large 6.41 Why ?

PLAT172\_ALERT\_4\_G The CIF-Embedded .res File Contains DFIX Records 4 Report  
PLAT177\_ALERT\_4\_G The CIF-Embedded .res File Contains DELU Records 1 Report  
PLAT178\_ALERT\_4\_G The CIF-Embedded .res File Contains SIMU Records 1 Report  
PLAT186\_ALERT\_4\_G The CIF-Embedded .res File Contains ISOR Records 1 Report  
PLAT188\_ALERT\_3\_G A Non-default SIMU Restraint Value has been used 0.0200 Report  
PLAT192\_ALERT\_3\_G A Non-default DELU Restraint Value for First Par 0.0200 Report  
PLAT301\_ALERT\_3\_G Main Residue Disorder .....(Resd 1 ) 38% Note  
PLAT811\_ALERT\_5\_G No ADDSYM Analysis: Too Many Excluded Atoms .... ! Info  
PLAT860\_ALERT\_3\_G Number of Least-Squares Restraints ..... 291 Note  
PLAT883\_ALERT\_1\_G No Info/Value for \_atom\_sites\_solution\_primary . Please Do !  
PLAT899\_ALERT\_4\_G SHELXL2018 is Deprecated and Succeeded by SHELXL 2019/3 Note  
PLAT909\_ALERT\_3\_G Percentage of I>2sig(I) Data at Theta(Max) Still 43% Note  
PLAT910\_ALERT\_3\_G Missing # of FCF Reflection(s) Below Theta(Min). 1 Note  
PLAT933\_ALERT\_2\_G Number of HKL-OMIT Records in Embedded .res File 2 Note  
PLAT941\_ALERT\_3\_G Average HKL Measurement Multiplicity ..... 1.0 Low  
PLAT961\_ALERT\_5\_G Dataset Contains no Negative Intensities ..... Please Check  
PLAT965\_ALERT\_2\_G The SHELXL WEIGHT Optimisation has not Converged Please Check  
PLAT967\_ALERT\_5\_G Note: Two-Theta Cutoff Value in Embedded .res .. 50.5 Degree  
PLAT978\_ALERT\_2\_G Number C-C Bonds with Positive Residual Density. 1 Info  
PLAT992\_ALERT\_5\_G Repd & Actual \_reflns\_number\_gt Values Differ by 2 Check

0 **ALERT level A** = Most likely a serious problem - resolve or explain  
0 **ALERT level B** = A potentially serious problem, consider carefully  
4 **ALERT level C** = Check. Ensure it is not caused by an omission or oversight  
23 **ALERT level G** = General information/check it is not something unexpected

1 ALERT type 1 CIF construction/syntax error, inconsistent or missing data  
6 ALERT type 2 Indicator that the structure model may be wrong or deficient  
11 ALERT type 3 Indicator that the structure quality may be low  
5 ALERT type 4 Improvement, methodology, query or suggestion  
4 ALERT type 5 Informative message, check

It is advisable to attempt to resolve as many as possible of the alerts in all categories. Often the minor alerts point to easily fixed oversights, errors and omissions in your CIF or refinement strategy, so attention to these fine details can be worthwhile. In order to resolve some of the more serious problems it may be necessary to carry out additional measurements or structure refinements. However, the purpose of your study may justify the reported deviations and the more serious of these should normally be commented upon in the discussion or experimental section of a paper or in the "special\_details" fields of the CIF. checkCIF was carefully designed to identify outliers and unusual parameters, but every test has its limitations and alerts that are not important in a particular case may appear. Conversely, the absence of alerts does not guarantee there are no aspects of the results needing attention. It is up to the individual to critically assess their own results and, if necessary, seek expert advice.

#### Publication of your CIF in IUCr journals

A basic structural check has been run on your CIF. These basic checks will be run on all CIFs submitted for publication in IUCr journals (*Acta Crystallographica*, *Journal of Applied Crystallography*, *Journal of Synchrotron Radiation*); however, if you intend to submit to *Acta Crystallographica Section C* or *E* or *IUCrData*, you should make sure that **full publication checks** are run on the final version of your CIF prior to submission.

#### Publication of your CIF in other journals

Please refer to the *Notes for Authors* of the relevant journal for any special instructions relating to CIF submission.

PLATON version of 10/05/2023; check.def file version of 10/05/2023

**Datablock 1 - ellipsoid plot**

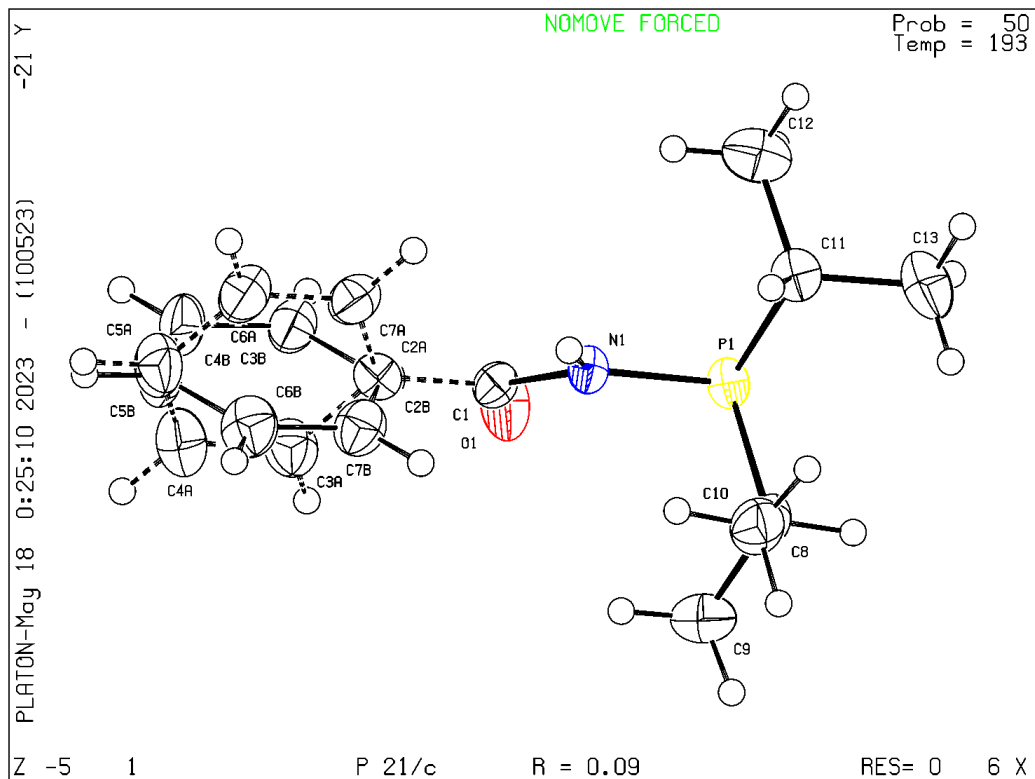

Supplement: Supplementary file 1 [file supplementary]
