# Supplementary material for: N-(diisopropylphosphanyl)benzamide
Source: Preprints.org preprint supplement (doi:10.20944/preprints202305.2256.v1), 2023-05-31
Supplement: Supplementary file 2 [file supplementary]

## Supplementary Information

# ***N*-(diisopropylphosphanyl)benzamide**

María M. Alcaide <sup>1</sup>, Daniel García Garrido <sup>1</sup>, Eleuterio Álvarez <sup>1</sup> and Riccardo Peloso <sup>1,\*</sup>

<sup>1</sup>Instituto de Investigaciones Químicas (IIQ), Departamento de Química Inorgánica and Centro de Innovación en Química Avanzada (ORFEO-CINQA), Consejo Superior de Investigaciones Científicas (CSIC) and Universidad de Sevilla, 41092 Sevilla, Spain.

\*rpeloso@us.es

**Table S1.** Crystal data and structure refinement for compound **1**

|                                   |                                                                   |                              |
|-----------------------------------|-------------------------------------------------------------------|------------------------------|
| Empirical formula                 | $\text{C}_{13}\text{H}_{20}\text{NOP}$                            |                              |
| Formula weight                    | 237.27                                                            |                              |
| Temperature                       | 193(2) K                                                          |                              |
| Wavelength                        | 0.71073 Å                                                         |                              |
| Crystal system                    | Monoclinic                                                        |                              |
| Space group                       | $P2_1/c$                                                          |                              |
| Unit cell dimensions              | $a = 15.482(3)$ Å                                                 | $\alpha = 90^\circ$ .        |
|                                   | $b = 8.741(2)$ Å                                                  | $\beta = 98.382(10)^\circ$ . |
|                                   | $c = 10.260(2)$ Å                                                 | $\gamma = 90^\circ$ .        |
| Volume                            | $1373.7(5)$ Å <sup>3</sup>                                        |                              |
| Z                                 | 4                                                                 |                              |
| Density (calculated)              | 1.147 Mg/m <sup>3</sup>                                           |                              |
| Absorption coefficient            | 0.182 mm <sup>-1</sup>                                            |                              |
| F(000)                            | 512                                                               |                              |
| Crystal size                      | 0.100 x 0.080 x 0.050 mm <sup>3</sup>                             |                              |
| Theta range for data collection   | 2.660 to 25.245°.                                                 |                              |
| Index ranges                      | $-18 \leq h \leq 18$ , $-9 \leq k \leq 10$ , $-12 \leq l \leq 11$ |                              |
| Reflections collected             | 2489                                                              |                              |
| Independent reflections           | 2489 [R(int) = 0.0843]                                            |                              |
| Completeness to theta = 25.242°   | 99.9 %                                                            |                              |
| Absorption correction             | Semi-empirical from equivalents                                   |                              |
| Max. and min. transmission        | 0.7460 and 0.6523                                                 |                              |
| Refinement method                 | Full-matrix least-squares on F <sup>2</sup>                       |                              |
| Data / restraints / parameters    | 2489 / 291 / 183                                                  |                              |
| Goodness-of-fit on F <sup>2</sup> | 1.113                                                             |                              |
| Final R indices [I > 2sigma(I)]   | R1 = 0.0864, wR2 = 0.1842                                         |                              |
| R indices (all data)              | R1 = 0.1289, wR2 = 0.2003                                         |                              |
| Extinction coefficient            | n/a                                                               |                              |
| Largest diff. peak and hole       | 0.380 and -0.322 e.Å <sup>-3</sup>                                |                              |

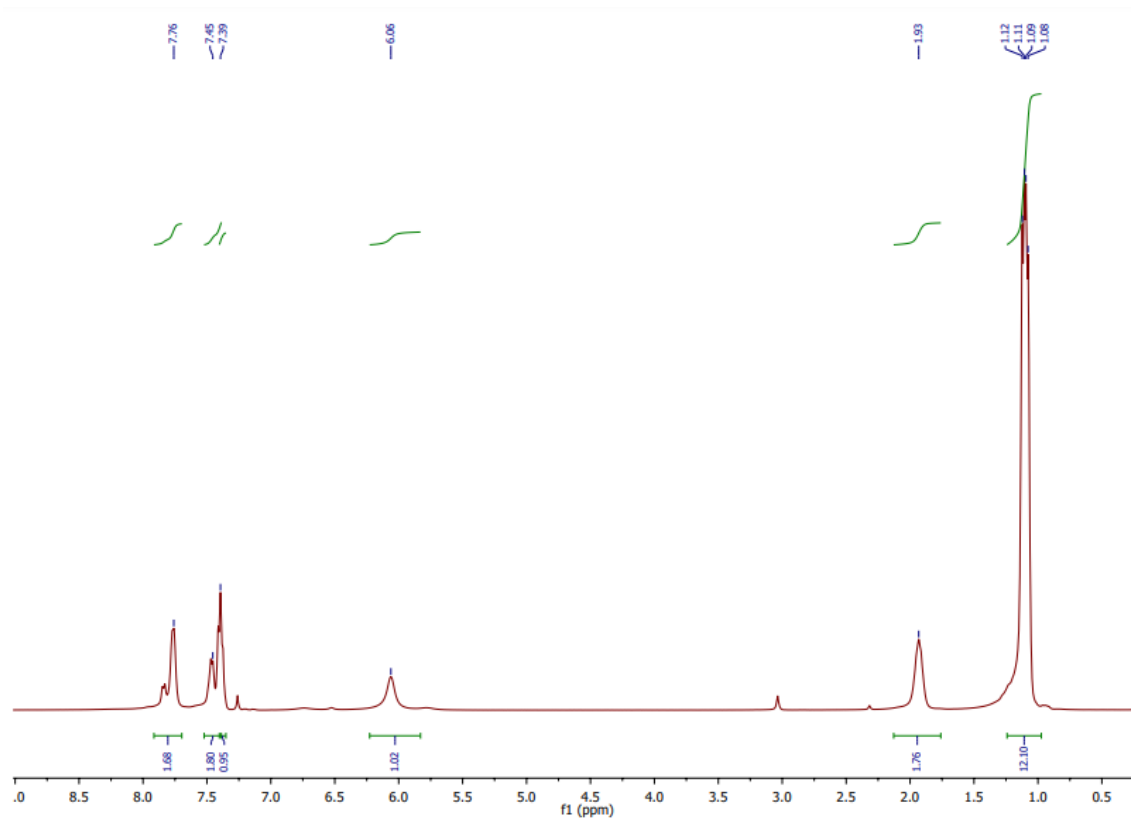

**Figure S1.** <sup>1</sup>H NMR spectrum of **1** (400 MHz, CDCl<sub>3</sub>).

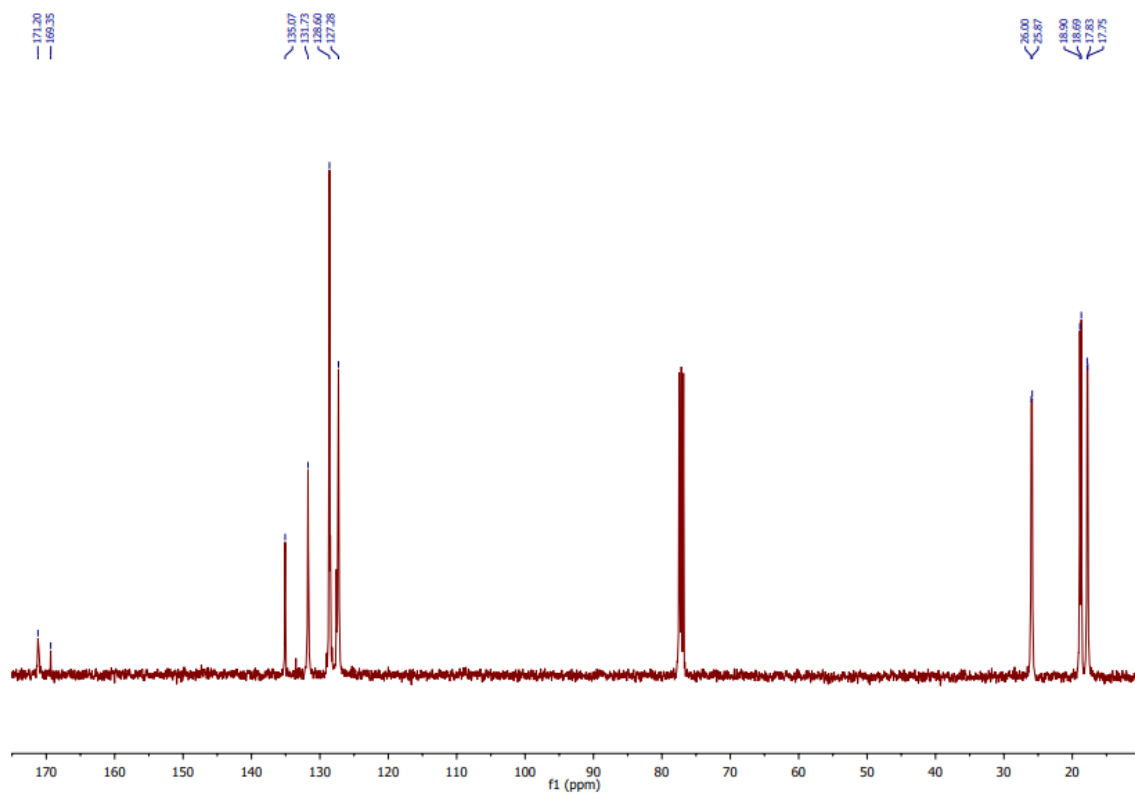

**Figure S2.** <sup>13</sup>C{<sup>1</sup>H} NMR spectrum of **1** (100 MHz, CDCl<sub>3</sub>).

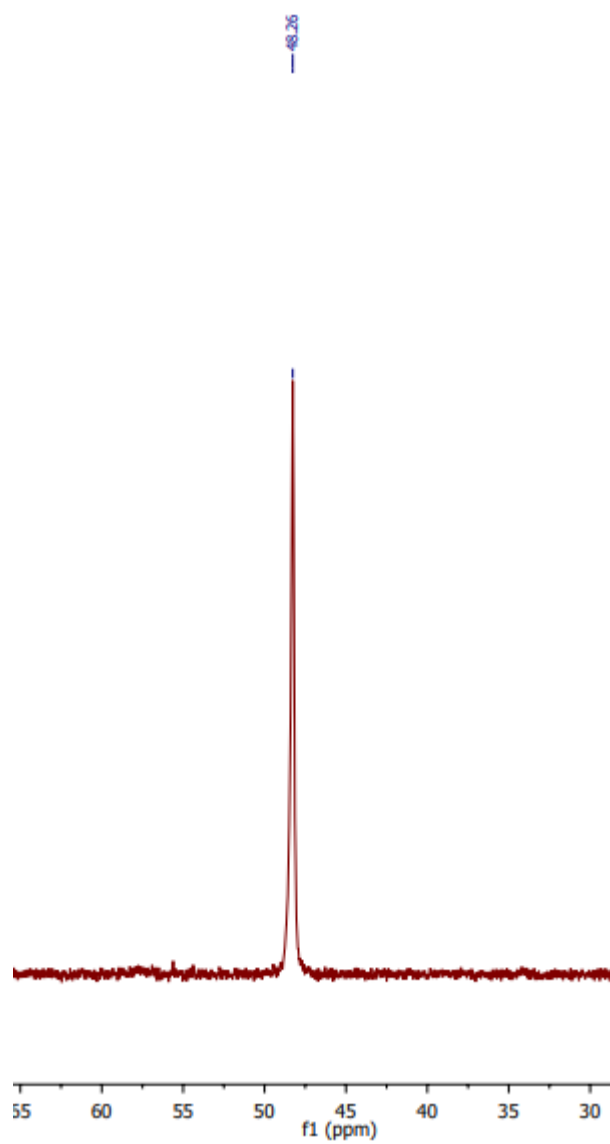

**Figure S3.**  $^{31}\text{P}\{^1\text{H}\}$  NMR spectrum of **1** (162 MHz,  $\text{CDCl}_3$ ).
