# Supplementary material for: N-(diisopropylphosphanyl)benzamide
Source: Preprints.org preprint supplement (doi:10.20944/preprints202305.2256.v1), 2023-05-31
Supplement: Supplementary file 3 [file supplementary]

Archive with 4 entries (4 files):
- CheckCIF PLATON_report_global_CIF_with one structure.pdf
- compound1.mol
- Global Cif with one structure.cif
- SI.pdf
