# Supplementary material for: N-(diisopropylphosphanyl)benzamide
Source: Preprints.org preprint supplement (doi:10.20944/preprints202305.2256.v1), 2023-05-31
Supplement: Supplementary file 3 [file supplementary › compound1.mol]

KingDraw KingDraw.mol
KingDraw2D

 16 16  0  0  0  0  0  0  0  0999 V2000
   32.4241   -6.9484    0.0000 C   0  0  0  0  0  0  0  0  0  0  0  0
   31.8296   -7.2916    0.0000 C   0  0  0  0  0  0  0  0  0  0  0  0
   31.2342   -6.9479    0.0000 C   0  0  0  0  0  0  0  0  0  0  0  0
   30.6388   -7.2916    0.0000 C   0  0  0  0  0  0  0  0  0  0  0  0
   30.6388   -7.9792    0.0000 C   0  0  0  0  0  0  0  0  0  0  0  0
   31.2342   -8.3230    0.0000 C   0  0  0  0  0  0  0  0  0  0  0  0
   31.8296   -7.9792    0.0000 C   0  0  0  0  0  0  0  0  0  0  0  0
   32.4241   -6.2620    0.0000 O   0  0  0  0  0  0  0  0  0  0  0  0
   33.0186   -7.2916    0.0000 N   0  0  0  0  0  0  0  0  0  0  0  0
   33.0186   -7.2916    0.0000 P   0  0  0  0  0  0  0  0  0  0  0  0
   33.0186   -7.2916    0.0000 C   0  0  0  0  0  0  0  0  0  0  0  0
   33.0186   -7.2916    0.0000 C   0  0  0  0  0  0  0  0  0  0  0  0
   33.0186   -7.2916    0.0000 C   0  0  0  0  0  0  0  0  0  0  0  0
   33.0186   -7.2916    0.0000 C   0  0  0  0  0  0  0  0  0  0  0  0
   33.0186   -7.2916    0.0000 C   0  0  0  0  0  0  0  0  0  0  0  0
   33.0186   -7.2916    0.0000 C   0  0  0  0  0  0  0  0  0  0  0  0
  9  1  1  0
  1  2  1  0
  2  3  2  0
  3  4  1  0
  4  5  2  0
  5  6  1  0
  6  7  2  0
  7  2  1  0
  1  8  2  0
 14 15  1  0
 14 16  1  0
 11 12  1  0
 11 13  1  0
 10 11  1  0
 10 14  1  0
  9 10  1  0
M  STY  1   1 SUP
M  SLB  1   1   1
M  SAL   1  8   9  10  11  12  13  14  15  16
M  SBL   1  1   1
M  SMT   1 ^NHPiPr2
M  END
