# Supplementary material for: N-(diisopropylphosphanyl)benzamide
Source: Preprints.org preprint supplement (doi:10.20944/preprints202305.2256.v1), 2023-05-31
Supplement: Supplementary file 3 [file supplementary › Global Cif with one structure.cif]

#=============================================================================80
# Data Global for 1
#=============================================================================80

data_global

_publ_section_title                                     
;
 N-(diisopropylphosphanyl)benzamide
; 
#
# by Mar\'ia M. Alcaide , Daniel Garc\'ia Garrido , Eleuterio \'Alvarez and  
# Riccardo Peloso
#  
# 
# To be submitted to Molbank
# Manuscript number ...........
#=============================================================================80
#
# Person for contact
_publ_contact_author_name  'Prof. Ricardo Peloso'
_publ_contact_author_address
;
   Instituto de Investigaciones Qu\'imicas (IIQ), Departamento de Qu\'imica
   Inorg\'anica and Centro de Innovaci\'on en Qu\'imica Avanzada (ORFEO-CINQA),
   Consejo Superior de Investigaciones Cient\'ificas (CSIC) and Universidad 
   de Sevilla, Avd. Am\'erico Vespucio, 49, Isla de la Cartuja, 41092 Sevilla,
   Spain.
;
_publ_contact_author_phone   '+34 954489562'
_publ_contact_author_fax     '+34 954460165'
_publ_contact_author_email        rpeloso@us.es
#
#=============================================================================80
#
# Publication details

loop_
_publ_author_name
_publ_author_address

     ' Mar\'ia M. Alcaide'
;
   Instituto de Investigaciones Qu\'imicas (IIQ), Departamento de Qu\'imica
   Inorg\'anica and Centro de Innovaci\'on en Qu\'imica Avanzada (ORFEO-CINQA),
   Consejo Superior de Investigaciones Cient\'ificas (CSIC) and Universidad 
   de Sevilla, Avd. Am\'erico Vespucio, 49, Isla de la Cartuja, 41092 Sevilla,
   Spain.
;
     'Daniel Garc\'ia Garrido'
;
   Instituto de Investigaciones Qu\'imicas (IIQ), Departamento de Qu\'imica
   Inorg\'anica and Centro de Innovaci\'on en Qu\'imica Avanzada (ORFEO-CINQA),
   Consejo Superior de Investigaciones Cient\'ificas (CSIC) and Universidad 
   de Sevilla, Avd. Am\'erico Vespucio, 49, Isla de la Cartuja, 41092 Sevilla,
   Spain.
;
     'Eleuterio \'Alvarez'
;
    Instituto de Investigaciones Qu\'imicas, C.S.I.C-Universidad de Sevilla,
    Avd. Am\'erico Vespucio, 49, Isla de la Cartuja, E-41092 Sevilla,  Spain 
;
     'Riccardo Peloso'
;
   Instituto de Investigaciones Qu\'imicas (IIQ), Departamento de Qu\'imica
   Inorg\'anica and Centro de Innovaci\'on en Qu\'imica Avanzada (ORFEO-CINQA),
   Consejo Superior de Investigaciones Cient\'ificas (CSIC) and Universidad 
   de Sevilla, Avd. Am\'erico Vespucio, 49, Isla de la Cartuja, 41092 Sevilla,
   Spain.
;

 _publ_requested_journal   'Molbank'
 _journal_name_full
;
  Molbank
;
 _journal_volume                '?'
 _journal_page_first            '?'
 _journal_page_last             '?'
 _journal_year                  '2023'


#=========================================================================
# One crystal structure follow, terminaed by #===END.
# The CIF has been tested by program checkCIF
#=========================================================================

#=========================================================================
# Data for compound 1 (local labelling rpq01419x)
#========================================================================= 
 
data_1
  
_audit_creation_method            'SHELXL-2018/3' 
_shelx_SHELXL_version_number      '2018/3' 
_chemical_name_systematic         ? 
_chemical_name_common             ? 
_chemical_melting_point           ? 
_chemical_formula_moiety          'C13 H20 N O P' 
_chemical_formula_sum             'C13 H20 N O P' 
_chemical_formula_weight          237.27 
  
loop_ 
 _atom_type_symbol 
 _atom_type_description 
 _atom_type_scat_dispersion_real 
 _atom_type_scat_dispersion_imag 
 _atom_type_scat_source 
 'C'  'C'   0.0033   0.0016 
 'International Tables Vol C Tables 4.2.6.8 and 6.1.1.4' 
 'H'  'H'   0.0000   0.0000 
 'International Tables Vol C Tables 4.2.6.8 and 6.1.1.4' 
 'N'  'N'   0.0061   0.0033 
 'International Tables Vol C Tables 4.2.6.8 and 6.1.1.4' 
 'O'  'O'   0.0106   0.0060 
 'International Tables Vol C Tables 4.2.6.8 and 6.1.1.4' 
 'P'  'P'   0.1023   0.0942 
 'International Tables Vol C Tables 4.2.6.8 and 6.1.1.4' 
  
_space_group_crystal_system       monoclinic 
_space_group_IT_number            14 
_space_group_name_H-M_alt         'P 21/c' 
_space_group_name_Hall            '-P 2ybc' 
  
_shelx_space_group_comment 
; 
The symmetry employed for this shelxl refinement is uniquely defined 
by the following loop, which should always be used as a source of 
symmetry information in preference to the above space-group names. 
They are only intended as comments. 
; 
  
loop_ 
 _space_group_symop_operation_xyz 
 'x, y, z' 
 '-x, y+1/2, -z+1/2' 
 '-x, -y, -z' 
 'x, -y-1/2, z-1/2' 
  
_cell_length_a                    15.482(3) 
_cell_length_b                    8.741(2) 
_cell_length_c                    10.260(2) 
_cell_angle_alpha                 90 
_cell_angle_beta                  98.382(10) 
_cell_angle_gamma                 90 
_cell_volume                      1373.7(5) 
_cell_formula_units_Z             4 
_cell_measurement_temperature     193(2) 
_cell_measurement_reflns_used     1046 
_cell_measurement_theta_min       2.66 
_cell_measurement_theta_max       22.82 
  
_exptl_crystal_description        prism 
_exptl_crystal_colour             colourless 
_exptl_crystal_density_meas       ? 
_exptl_crystal_density_method     ? 
_exptl_crystal_density_diffrn     1.147 
_exptl_crystal_F_000              512 
_exptl_transmission_factor_min    ? 
_exptl_transmission_factor_max    ? 
_exptl_crystal_size_max           0.100 
_exptl_crystal_size_mid           0.080 
_exptl_crystal_size_min           0.050 
_exptl_absorpt_coefficient_mu     0.182 
_shelx_estimated_absorpt_T_min    0.982 
_shelx_estimated_absorpt_T_max    0.991 
_exptl_absorpt_correction_type    multi-scan 
_exptl_absorpt_correction_T_min   0.6523
_exptl_absorpt_correction_T_max   0.7460 
_exptl_absorpt_process_details 
;
program SADABS, Bruker (2001).
; 
_diffrn_ambient_temperature       193(2) 
_diffrn_radiation_wavelength      0.71073 
_diffrn_radiation_type            MoK\a 
_diffrn_radiation_source          'fine-focus sealed tube' 
_diffrn_radiation_monochromator   graphite 
_diffrn_measurement_device_type   
;
 Bruker-Nonius X8kappa APEX II CCD area detector
; 
_diffrn_measurement_method        'phi and omega scans with narrow frames' 
_diffrn_detector_area_resol_mean   8.26
_diffrn_reflns_number             2489 
_diffrn_reflns_av_unetI/netI      0.0606 
_diffrn_reflns_av_R_equivalents   0.0843
_diffrn_reflns_limit_h_min        -18
_diffrn_reflns_limit_h_max        18
_diffrn_reflns_limit_k_min        -9
_diffrn_reflns_limit_k_max        10
_diffrn_reflns_limit_l_min        -12
_diffrn_reflns_limit_l_max        11 
_diffrn_reflns_theta_min          2.660 
_diffrn_reflns_theta_max          25.245 
_diffrn_reflns_theta_full         25.242 
_diffrn_measured_fraction_theta_max   0.999 
_diffrn_measured_fraction_theta_full  0.999 
_diffrn_reflns_Laue_measured_fraction_max    0.999 
_diffrn_reflns_Laue_measured_fraction_full   0.999 
_diffrn_reflns_point_group_measured_fraction_max   0.999 
_diffrn_reflns_point_group_measured_fraction_full  0.999 
_reflns_number_total              2489 
_reflns_number_gt                 1754 
_reflns_threshold_expression      'I > 2\s(I)' 
_reflns_Friedel_coverage          0.000 
_reflns_Friedel_fraction_max      . 
_reflns_Friedel_fraction_full     . 
  
_reflns_special_details 
; 
 Reflections were merged by SHELXL according to the crystal 
 class for the calculation of statistics and refinement. 
  
 _reflns_Friedel_fraction is defined as the number of unique 
 Friedel pairs measured divided by the number that would be 
 possible theoretically, ignoring centric projections and 
 systematic absences. 
; 
  
_computing_data_collection        'Bruker APEX2' 
_computing_cell_refinement        'Bruker SAINT' 
_computing_data_reduction         'Bruker SAINT' 
_computing_structure_solution     'SHELXS-97 (Sheldrick, 2008)' 
_computing_structure_refinement 'SHELXL-2018/3 (Sheldrick, 2018)' 
_computing_molecular_graphics     'Bruker SHELXTL' 
_computing_publication_material   'Bruker SHELXTL' 
_refine_special_details           ? 
_refine_ls_structure_factor_coef  Fsqd 
_refine_ls_matrix_type            full 
_refine_ls_weighting_scheme       calc 
_refine_ls_weighting_details 
'w=1/[\s^2^(Fo^2^)+(0.0323P)^2^+6.4106P] where P=(Fo^2^+2Fc^2^)/3' 
_atom_sites_solution_primary      ? 
_atom_sites_solution_secondary    ? 
_atom_sites_solution_hydrogens    mixed 
_refine_ls_hydrogen_treatment     mixed 
_refine_ls_extinction_method      none 
_refine_ls_extinction_coef        . 
_refine_ls_number_reflns          2489 
_refine_ls_number_parameters      183 
_refine_ls_number_restraints      291 
_refine_ls_R_factor_all           0.1289 
_refine_ls_R_factor_gt            0.0864 
_refine_ls_wR_factor_ref          0.2003 
_refine_ls_wR_factor_gt           0.1842 
_refine_ls_goodness_of_fit_ref    1.113 
_refine_ls_restrained_S_all       1.060 
_refine_ls_shift/su_max           0.000 
_refine_ls_shift/su_mean          0.000 
  
loop_ 
 _atom_site_label 
 _atom_site_type_symbol 
 _atom_site_fract_x 
 _atom_site_fract_y 
 _atom_site_fract_z 
 _atom_site_U_iso_or_equiv 
 _atom_site_adp_type 
 _atom_site_occupancy 
 _atom_site_site_symmetry_order 
 _atom_site_calc_flag 
 _atom_site_refinement_flags_posn 
 _atom_site_refinement_flags_adp 
 _atom_site_refinement_flags_occupancy 
 _atom_site_disorder_assembly 
 _atom_site_disorder_group 
P1 P 0.33676(8) 0.18669(16) 0.96861(12) 0.0274(4) Uani 1 1 d D . . . . 
O1 O 0.1917(2) 0.2127(5) 0.7439(3) 0.0463(11) Uani 1 1 d . . . . . 
N1 N 0.2261(2) 0.2199(5) 0.9669(4) 0.0256(9) Uani 1 1 d D . . . . 
H1 H 0.200(3) 0.238(6) 1.046(3) 0.031 Uiso 1 1 d D U . . . 
C1 C 0.1684(3) 0.2242(6) 0.8532(5) 0.0288(12) Uani 1 1 d . . . . . 
C2A C 0.0728(3) 0.2466(9) 0.8660(7) 0.027(3) Uani 0.496(5) 1 d G U P A 1 
C3A C 0.0110(5) 0.1720(9) 0.7763(6) 0.044(2) Uani 0.496(5) 1 d G U P A 1 
H3A H 0.029101 0.108493 0.710183 0.052 Uiso 0.496(5) 1 calc R U P A 1 
C4A C -0.0774(4) 0.1903(10) 0.7833(7) 0.053(3) Uani 0.496(5) 1 d G U P A 1 
H4A H -0.119698 0.139302 0.721997 0.063 Uiso 0.496(5) 1 calc R U P A 1 
C5A C -0.1040(3) 0.2832(11) 0.8800(8) 0.048(3) Uani 0.496(5) 1 d G U P A 1 
H5A H -0.164389 0.295741 0.884789 0.057 Uiso 0.496(5) 1 calc R U P A 1 
C6A C -0.0421(5) 0.3579(9) 0.9697(7) 0.045(3) Uani 0.496(5) 1 d G U P A 1 
H6A H -0.060281 0.421372 1.035767 0.054 Uiso 0.496(5) 1 calc R U P A 1 
C7A C 0.0463(4) 0.3396(8) 0.9627(6) 0.038(2) Uani 0.496(5) 1 d G U P A 1 
H7A H 0.088518 0.390564 1.023955 0.045 Uiso 0.496(5) 1 calc R U P A 1 
C2B C 0.0759(3) 0.2447(9) 0.8666(7) 0.029(3) Uani 0.504(5) 1 d G U P A 2 
C3B C 0.0244(4) 0.3347(8) 0.7742(6) 0.040(2) Uani 0.504(5) 1 d G U P A 2 
H3B H 0.050163 0.387300 0.708505 0.048 Uiso 0.504(5) 1 calc R U P A 2 
C4B C -0.0647(4) 0.3476(9) 0.7778(7) 0.050(3) Uani 0.504(5) 1 d G U P A 2 
H4B H -0.099832 0.409087 0.714652 0.061 Uiso 0.504(5) 1 calc R U P A 2 
C5B C -0.1023(3) 0.2706(10) 0.8739(8) 0.047(3) Uani 0.504(5) 1 d G U P A 2 
H5B H -0.163201 0.279429 0.876389 0.057 Uiso 0.504(5) 1 calc R U P A 2 
C6B C -0.0508(4) 0.1806(9) 0.9663(7) 0.047(3) Uani 0.504(5) 1 d G U P A 2 
H6B H -0.076575 0.127983 1.031981 0.056 Uiso 0.504(5) 1 calc R U P A 2 
C7B C 0.0383(4) 0.1677(9) 0.9627(6) 0.041(2) Uani 0.504(5) 1 d G U P A 2 
H7B H 0.073421 0.106194 1.025836 0.049 Uiso 0.504(5) 1 calc R U P A 2 
C8 C 0.3455(3) -0.0091(6) 1.0379(5) 0.0358(13) Uani 1 1 d D . . . . 
H8 H 0.408892 -0.036338 1.050938 0.043 Uiso 1 1 calc R U . . . 
C9 C 0.2996(4) -0.1198(7) 0.9333(6) 0.0544(17) Uani 1 1 d D . . . . 
H9A H 0.310143 -0.225441 0.963508 0.082 Uiso 1 1 calc R U . . . 
H9B H 0.322809 -0.105144 0.850249 0.082 Uiso 1 1 calc R U . . . 
H9C H 0.236707 -0.099371 0.919533 0.082 Uiso 1 1 calc R U . . . 
C10 C 0.3136(4) -0.0330(7) 1.1700(5) 0.0447(15) Uani 1 1 d D . . . . 
H10A H 0.252123 -0.002651 1.162856 0.067 Uiso 1 1 calc R U . . . 
H10B H 0.348594 0.029407 1.237395 0.067 Uiso 1 1 calc R U . . . 
H10C H 0.319458 -0.141192 1.194774 0.067 Uiso 1 1 calc R U . . . 
C11 C 0.3789(3) 0.3055(6) 1.1105(5) 0.0339(12) Uani 1 1 d D . . . . 
H11 H 0.345705 0.281949 1.184692 0.041 Uiso 1 1 calc R U . . . 
C12 C 0.3649(4) 0.4741(7) 1.0720(6) 0.0546(17) Uani 1 1 d D . . . . 
H12A H 0.389898 0.539120 1.145769 0.082 Uiso 1 1 calc R U . . . 
H12B H 0.302224 0.494787 1.050513 0.082 Uiso 1 1 calc R U . . . 
H12C H 0.393629 0.496196 0.995066 0.082 Uiso 1 1 calc R U . . . 
C13 C 0.4756(4) 0.2722(8) 1.1545(6) 0.0547(18) Uani 1 1 d D . . . . 
H13A H 0.508438 0.293506 1.081810 0.082 Uiso 1 1 calc R U . . . 
H13B H 0.482966 0.164413 1.180061 0.082 Uiso 1 1 calc R U . . . 
H13C H 0.497450 0.337231 1.229962 0.082 Uiso 1 1 calc R U . . . 
  
loop_ 
 _atom_site_aniso_label 
 _atom_site_aniso_U_11 
 _atom_site_aniso_U_22 
 _atom_site_aniso_U_33 
 _atom_site_aniso_U_23 
 _atom_site_aniso_U_13 
 _atom_site_aniso_U_12 
P1 0.0241(6) 0.0370(8) 0.0220(6) 0.0011(6) 0.0063(5) -0.0012(6) 
O1 0.035(2) 0.082(3) 0.0215(19) 0.001(2) 0.0047(16) 0.001(2) 
N1 0.024(2) 0.033(2) 0.020(2) -0.0015(18) 0.0027(16) 0.0030(17) 
C1 0.032(3) 0.028(3) 0.025(3) 0.008(2) 0.000(2) 0.003(2) 
C2A 0.032(6) 0.031(6) 0.020(6) 0.004(5) 0.006(5) -0.004(5) 
C3A 0.042(5) 0.050(5) 0.038(5) -0.004(5) 0.002(4) 0.000(5) 
C4A 0.038(5) 0.067(6) 0.050(5) 0.004(5) -0.001(5) -0.002(5) 
C5A 0.029(6) 0.059(7) 0.056(6) -0.002(6) 0.009(5) 0.002(6) 
C6A 0.043(5) 0.046(6) 0.045(5) -0.001(5) 0.002(4) 0.012(5) 
C7A 0.043(5) 0.035(5) 0.035(5) -0.002(4) 0.002(4) 0.008(4) 
C2B 0.033(6) 0.030(6) 0.021(6) 0.000(5) 0.000(5) -0.001(6) 
C3B 0.035(5) 0.040(5) 0.044(5) 0.003(4) 0.003(4) 0.006(4) 
C4B 0.038(5) 0.054(6) 0.053(5) 0.000(5) -0.014(4) 0.009(5) 
C5B 0.026(6) 0.058(7) 0.058(6) -0.002(6) 0.007(5) 0.006(5) 
C6B 0.042(5) 0.056(6) 0.045(5) -0.005(5) 0.015(4) 0.003(5) 
C7B 0.040(5) 0.045(5) 0.038(5) -0.001(4) 0.007(4) 0.006(4) 
C8 0.025(3) 0.037(3) 0.046(3) 0.005(3) 0.005(2) 0.004(2) 
C9 0.063(4) 0.035(4) 0.065(4) -0.006(3) 0.007(3) -0.001(3) 
C10 0.043(3) 0.042(4) 0.048(4) 0.013(3) 0.004(3) 0.001(3) 
C11 0.035(3) 0.040(3) 0.028(3) 0.001(3) 0.009(2) -0.001(3) 
C12 0.067(4) 0.043(4) 0.055(4) -0.001(3) 0.011(3) -0.010(3) 
C13 0.039(3) 0.070(5) 0.052(4) -0.007(3) -0.005(3) -0.010(3) 
  
_geom_special_details 
; 
 All esds (except the esd in the dihedral angle between two l.s. planes) 
 are estimated using the full covariance matrix.  The cell esds are taken 
 into account individually in the estimation of esds in distances, angles 
 and torsion angles; correlations between esds in cell parameters are only 
 used when they are defined by crystal symmetry.  An approximate (isotropic) 
 treatment of cell esds is used for estimating esds involving l.s. planes. 
; 
  
loop_ 
 _geom_bond_atom_site_label_1 
 _geom_bond_atom_site_label_2 
 _geom_bond_distance 
 _geom_bond_site_symmetry_2 
 _geom_bond_publ_flag 
P1 N1 1.735(4) . ? 
P1 C11 1.830(5) . ? 
P1 C8 1.850(5) . ? 
O1 C1 1.231(6) . ? 
N1 C1 1.363(6) . ? 
N1 H1 0.977(9) . ? 
C1 C2B 1.470(7) . ? 
C1 C2A 1.518(7) . ? 
C2A C3A 1.3900 . ? 
C2A C7A 1.3900 . ? 
C3A C4A 1.3900 . ? 
C3A H3A 0.9500 . ? 
C4A C5A 1.3900 . ? 
C4A H4A 0.9500 . ? 
C5A C6A 1.3900 . ? 
C5A H5A 0.9500 . ? 
C6A C7A 1.3900 . ? 
C6A H6A 0.9500 . ? 
C7A H7A 0.9500 . ? 
C2B C3B 1.3900 . ? 
C2B C7B 1.3900 . ? 
C3B C4B 1.3900 . ? 
C3B H3B 0.9500 . ? 
C4B C5B 1.3900 . ? 
C4B H4B 0.9500 . ? 
C5B C6B 1.3900 . ? 
C5B H5B 0.9500 . ? 
C6B C7B 1.3900 . ? 
C6B H6B 0.9500 . ? 
C7B H7B 0.9500 . ? 
C8 C10 1.524(7) . ? 
C8 C9 1.540(7) . ? 
C8 H8 1.0000 . ? 
C9 H9A 0.9800 . ? 
C9 H9B 0.9800 . ? 
C9 H9C 0.9800 . ? 
C10 H10A 0.9800 . ? 
C10 H10B 0.9800 . ? 
C10 H10C 0.9800 . ? 
C11 C13 1.528(7) . ? 
C11 C12 1.533(7) . ? 
C11 H11 1.0000 . ? 
C12 H12A 0.9800 . ? 
C12 H12B 0.9800 . ? 
C12 H12C 0.9800 . ? 
C13 H13A 0.9800 . ? 
C13 H13B 0.9800 . ? 
C13 H13C 0.9800 . ? 
  
loop_ 
 _geom_angle_atom_site_label_1 
 _geom_angle_atom_site_label_2 
 _geom_angle_atom_site_label_3 
 _geom_angle 
 _geom_angle_site_symmetry_1 
 _geom_angle_site_symmetry_3 
 _geom_angle_publ_flag 
N1 P1 C11 98.6(2) . . ? 
N1 P1 C8 100.1(2) . . ? 
C11 P1 C8 102.8(2) . . ? 
C1 N1 P1 122.4(3) . . ? 
C1 N1 H1 114(3) . . ? 
P1 N1 H1 123(3) . . ? 
O1 C1 N1 122.4(4) . . ? 
O1 C1 C2B 120.9(5) . . ? 
N1 C1 C2B 116.7(5) . . ? 
O1 C1 C2A 120.5(5) . . ? 
N1 C1 C2A 117.1(5) . . ? 
C3A C2A C7A 120.0 . . ? 
C3A C2A C1 117.9(5) . . ? 
C7A C2A C1 122.1(5) . . ? 
C2A C3A C4A 120.0 . . ? 
C2A C3A H3A 120.0 . . ? 
C4A C3A H3A 120.0 . . ? 
C5A C4A C3A 120.0 . . ? 
C5A C4A H4A 120.0 . . ? 
C3A C4A H4A 120.0 . . ? 
C4A C5A C6A 120.0 . . ? 
C4A C5A H5A 120.0 . . ? 
C6A C5A H5A 120.0 . . ? 
C5A C6A C7A 120.0 . . ? 
C5A C6A H6A 120.0 . . ? 
C7A C6A H6A 120.0 . . ? 
C6A C7A C2A 120.0 . . ? 
C6A C7A H7A 120.0 . . ? 
C2A C7A H7A 120.0 . . ? 
C3B C2B C7B 120.0 . . ? 
C3B C2B C1 118.3(5) . . ? 
C7B C2B C1 121.5(5) . . ? 
C2B C3B C4B 120.0 . . ? 
C2B C3B H3B 120.0 . . ? 
C4B C3B H3B 120.0 . . ? 
C5B C4B C3B 120.0 . . ? 
C5B C4B H4B 120.0 . . ? 
C3B C4B H4B 120.0 . . ? 
C4B C5B C6B 120.0 . . ? 
C4B C5B H5B 120.0 . . ? 
C6B C5B H5B 120.0 . . ? 
C5B C6B C7B 120.0 . . ? 
C5B C6B H6B 120.0 . . ? 
C7B C6B H6B 120.0 . . ? 
C6B C7B C2B 120.0 . . ? 
C6B C7B H7B 120.0 . . ? 
C2B C7B H7B 120.0 . . ? 
C10 C8 C9 110.9(5) . . ? 
C10 C8 P1 117.0(4) . . ? 
C9 C8 P1 108.3(4) . . ? 
C10 C8 H8 106.7 . . ? 
C9 C8 H8 106.7 . . ? 
P1 C8 H8 106.7 . . ? 
C8 C9 H9A 109.5 . . ? 
C8 C9 H9B 109.5 . . ? 
H9A C9 H9B 109.5 . . ? 
C8 C9 H9C 109.5 . . ? 
H9A C9 H9C 109.5 . . ? 
H9B C9 H9C 109.5 . . ? 
C8 C10 H10A 109.5 . . ? 
C8 C10 H10B 109.5 . . ? 
H10A C10 H10B 109.5 . . ? 
C8 C10 H10C 109.5 . . ? 
H10A C10 H10C 109.5 . . ? 
H10B C10 H10C 109.5 . . ? 
C13 C11 C12 110.8(5) . . ? 
C13 C11 P1 110.3(4) . . ? 
C12 C11 P1 108.7(4) . . ? 
C13 C11 H11 109.0 . . ? 
C12 C11 H11 109.0 . . ? 
P1 C11 H11 109.0 . . ? 
C11 C12 H12A 109.5 . . ? 
C11 C12 H12B 109.5 . . ? 
H12A C12 H12B 109.5 . . ? 
C11 C12 H12C 109.5 . . ? 
H12A C12 H12C 109.5 . . ? 
H12B C12 H12C 109.5 . . ? 
C11 C13 H13A 109.5 . . ? 
C11 C13 H13B 109.5 . . ? 
H13A C13 H13B 109.5 . . ? 
C11 C13 H13C 109.5 . . ? 
H13A C13 H13C 109.5 . . ? 
H13B C13 H13C 109.5 . . ? 
  
loop_ 
 _geom_torsion_atom_site_label_1 
 _geom_torsion_atom_site_label_2 
 _geom_torsion_atom_site_label_3 
 _geom_torsion_atom_site_label_4 
 _geom_torsion 
 _geom_torsion_site_symmetry_1 
 _geom_torsion_site_symmetry_2 
 _geom_torsion_site_symmetry_3 
 _geom_torsion_site_symmetry_4 
 _geom_torsion_publ_flag 
C11 P1 N1 C1 146.8(4) . . . . ? 
C8 P1 N1 C1 -108.4(4) . . . . ? 
P1 N1 C1 O1 -3.8(7) . . . . ? 
P1 N1 C1 C2B 176.6(4) . . . . ? 
P1 N1 C1 C2A 177.1(4) . . . . ? 
O1 C1 C2A C3A 36.1(8) . . . . ? 
N1 C1 C2A C3A -144.8(5) . . . . ? 
O1 C1 C2A C7A -143.2(5) . . . . ? 
N1 C1 C2A C7A 35.8(7) . . . . ? 
C7A C2A C3A C4A 0.0 . . . . ? 
C1 C2A C3A C4A -179.4(7) . . . . ? 
C2A C3A C4A C5A 0.0 . . . . ? 
C3A C4A C5A C6A 0.0 . . . . ? 
C4A C5A C6A C7A 0.0 . . . . ? 
C5A C6A C7A C2A 0.0 . . . . ? 
C3A C2A C7A C6A 0.0 . . . . ? 
C1 C2A C7A C6A 179.3(7) . . . . ? 
O1 C1 C2B C3B -36.8(8) . . . . ? 
N1 C1 C2B C3B 142.7(5) . . . . ? 
O1 C1 C2B C7B 138.3(5) . . . . ? 
N1 C1 C2B C7B -42.1(7) . . . . ? 
C7B C2B C3B C4B 0.0 . . . . ? 
C1 C2B C3B C4B 175.3(7) . . . . ? 
C2B C3B C4B C5B 0.0 . . . . ? 
C3B C4B C5B C6B 0.0 . . . . ? 
C4B C5B C6B C7B 0.0 . . . . ? 
C5B C6B C7B C2B 0.0 . . . . ? 
C3B C2B C7B C6B 0.0 . . . . ? 
C1 C2B C7B C6B -175.1(7) . . . . ? 
N1 P1 C8 C10 -55.6(4) . . . . ? 
C11 P1 C8 C10 45.7(4) . . . . ? 
N1 P1 C8 C9 70.6(4) . . . . ? 
C11 P1 C8 C9 171.9(4) . . . . ? 
N1 P1 C11 C13 167.9(4) . . . . ? 
C8 P1 C11 C13 65.4(4) . . . . ? 
N1 P1 C11 C12 -70.4(4) . . . . ? 
C8 P1 C11 C12 -172.9(4) . . . . ? 
  
loop_ 
 _geom_hbond_atom_site_label_D 
 _geom_hbond_atom_site_label_H 
 _geom_hbond_atom_site_label_A 
 _geom_hbond_distance_DH 
 _geom_hbond_distance_HA 
 _geom_hbond_distance_DA 
 _geom_hbond_angle_DHA 
 _geom_hbond_site_symmetry_A 
 _geom_hbond_publ_flag 
N1 H1 O1  0.977(9) 2.09(2) 3.025(5) 159(4) 4_566 yes 
  
_refine_diff_density_max    0.380 
_refine_diff_density_min   -0.322 
_refine_diff_density_rms    0.081 
  
_shelx_res_file 
; 
TITL rp01419x in P2(1)/c 
    rp01419x.res 
    created by SHELXL-2018/3 at 23:00:53 on 26-May-2019 
CELL 0.71073  15.4818   8.7414  10.2603  90.000  98.382  90.000 
ZERR    4.00   0.0029   0.0020   0.0021   0.000   0.010   0.000 
LATT 1 
SYMM -x, y+1/2, -z+1/2 
SFAC C  H  N  O  P 
UNIT 52 80 4 4 4 
OMIT   0.00  50.50 
OMIT 0 2 2 
OMIT 1 0 0 
L.S. 63 
ACTA 
BOND $H 
FMAP 2 
PLAN 10 
CONF 
DFIX 0.98 0.009 N1 H1 
ISOR 0.02 C2A > C7B 
DELU 0.02 C2A > C7B 
SIMU 0.02 C2A > C7B 
DFIX 1.83 0.02 P1 C8 P1 C11 
DFIX 2.53 0.02 C9 C10 C12 C13 
DFIX 1.55 0.02 C8 C9 C8 C10 C11 C12 C11 C13 
SIZE 0.050 0.080 0.100 
EQIV $1 x, -y+1/2, z+1/2 
HTAB N1 O1_$1 
TEMP -80.000 
WGHT    0.032300    6.410600 
FVAR       0.22511   0.49558 
P1    5    0.336763    0.186688    0.968608    11.00000    0.02410    0.03704 = 
         0.02196    0.00114    0.00634   -0.00118 
O1    4    0.191689    0.212683    0.743870    11.00000    0.03516    0.08241 = 
         0.02146    0.00140    0.00468    0.00144 
N1    3    0.226098    0.219886    0.966893    11.00000    0.02368    0.03277 = 
         0.02033   -0.00146    0.00268    0.00301 
H1    2    0.199664    0.237579    1.046468    11.00000   -1.20000 
C1    1    0.168425    0.224204    0.853157    11.00000    0.03182    0.02818 = 
         0.02508    0.00805    0.00008    0.00320 
PART 1 
AFIX  66 
C2A   1    0.072800    0.246631    0.865957    21.00000    0.03182    0.03055 = 
         0.02029    0.00430    0.00623   -0.00407 
C3A   1    0.010958    0.172005    0.776274    21.00000    0.04171    0.04964 = 
         0.03823   -0.00383    0.00246    0.00031 
AFIX  43 
H3A   2    0.029101    0.108493    0.710183    21.00000   -1.20000 
AFIX  65 
C4A   1   -0.077431    0.190306    0.783292    21.00000    0.03809    0.06703 = 
         0.05045    0.00406   -0.00109   -0.00207 
AFIX  43 
H4A   2   -0.119698    0.139302    0.721997    21.00000   -1.20000 
AFIX  65 
C5A   1   -0.103979    0.283234    0.879993    21.00000    0.02862    0.05874 = 
         0.05632   -0.00173    0.00930    0.00169 
AFIX  43 
H5A   2   -0.164389    0.295741    0.884789    21.00000   -1.20000 
AFIX  65 
C6A   1   -0.042137    0.357861    0.969677    21.00000    0.04317    0.04568 = 
         0.04470   -0.00125    0.00155    0.01190 
AFIX  43 
H6A   2   -0.060281    0.421372    1.035767    21.00000   -1.20000 
AFIX  65 
C7A   1    0.046252    0.339560    0.962660    21.00000    0.04290    0.03513 = 
         0.03468   -0.00213    0.00241    0.00787 
AFIX  43 
H7A   2    0.088518    0.390564    1.023955    21.00000   -1.20000 
PART 2 
AFIX  66 
C2B   1    0.075895    0.244699    0.866591   -21.00000    0.03343    0.03026 = 
         0.02124   -0.00039   -0.00037   -0.00147 
C3B   1    0.024437    0.334660    0.774168   -21.00000    0.03528    0.04008 = 
         0.04409    0.00264    0.00319    0.00564 
AFIX  43 
H3B   2    0.050163    0.387300    0.708505   -21.00000   -1.20000 
AFIX  65 
C4B   1   -0.064663    0.347602    0.777819   -21.00000    0.03801    0.05441 = 
         0.05281   -0.00041   -0.01437    0.00893 
AFIX  43 
H4B   2   -0.099832    0.409087    0.714652   -21.00000   -1.20000 
AFIX  65 
C5B   1   -0.102305    0.270583    0.873894   -21.00000    0.02625    0.05808 = 
         0.05752   -0.00195    0.00695    0.00589 
AFIX  43 
H5B   2   -0.163201    0.279429    0.876389   -21.00000   -1.20000 
AFIX  65 
C6B   1   -0.050848    0.180621    0.966318   -21.00000    0.04198    0.05613 = 
         0.04542   -0.00468    0.01474    0.00285 
AFIX  43 
H6B   2   -0.076575    0.127983    1.031981   -21.00000   -1.20000 
AFIX  65 
C7B   1    0.038252    0.167678    0.962668   -21.00000    0.03964    0.04512 = 
         0.03787   -0.00113    0.00713    0.00602 
AFIX  43 
H7B   2    0.073421    0.106194    1.025836   -21.00000   -1.20000 
PART 0 
AFIX   0 
C8    1    0.345490   -0.009051    1.037878    11.00000    0.02450    0.03695 = 
         0.04591    0.00537    0.00473    0.00367 
AFIX  13 
H8    2    0.408892   -0.036338    1.050938    11.00000   -1.20000 
AFIX   0 
C9    1    0.299617   -0.119821    0.933284    11.00000    0.06285    0.03534 = 
         0.06450   -0.00644    0.00710   -0.00122 
AFIX 137 
H9A   2    0.310143   -0.225441    0.963508    11.00000   -1.50000 
H9B   2    0.322809   -0.105144    0.850249    11.00000   -1.50000 
H9C   2    0.236707   -0.099371    0.919533    11.00000   -1.50000 
AFIX   0 
C10   1    0.313569   -0.033009    1.170012    11.00000    0.04318    0.04226 = 
         0.04790    0.01297    0.00358    0.00054 
AFIX 137 
H10A  2    0.252123   -0.002651    1.162856    11.00000   -1.50000 
H10B  2    0.348594    0.029407    1.237395    11.00000   -1.50000 
H10C  2    0.319458   -0.141192    1.194774    11.00000   -1.50000 
AFIX   0 
C11   1    0.378885    0.305545    1.110493    11.00000    0.03514    0.03959 = 
         0.02821    0.00124    0.00866   -0.00096 
AFIX  13 
H11   2    0.345705    0.281949    1.184692    11.00000   -1.20000 
AFIX   0 
C12   1    0.364898    0.474108    1.071989    11.00000    0.06669    0.04296 = 
         0.05471   -0.00092    0.01084   -0.00961 
AFIX 137 
H12A  2    0.389898    0.539120    1.145769    11.00000   -1.50000 
H12B  2    0.302224    0.494787    1.050513    11.00000   -1.50000 
H12C  2    0.393629    0.496196    0.995066    11.00000   -1.50000 
AFIX   0 
C13   1    0.475604    0.272183    1.154529    11.00000    0.03856    0.07004 = 
         0.05210   -0.00728   -0.00501   -0.01045 
AFIX 137 
H13A  2    0.508438    0.293506    1.081810    11.00000   -1.50000 
H13B  2    0.482966    0.164413    1.180061    11.00000   -1.50000 
H13C  2    0.497450    0.337231    1.229962    11.00000   -1.50000 
AFIX   0 
HKLF      4 
  
  
  
  
REM  rp01419x in P2(1)/c 
REM wR2 = 0.2003, GooF = S = 1.113, Restrained GooF = 1.060 for all data 
REM R1 = 0.0864 for 1754 Fo > 4sig(Fo) and 0.1289 for all 2489 data 
REM 183 parameters refined using 291 restraints 
  
END 
  
WGHT      0.0000      6.5388 
  
REM Highest difference peak  0.380,  deepest hole -0.322,  1-sigma level  0.081 
Q1    1   0.2112  0.1679  0.9178  11.00000  0.05    0.38 
Q2    1   0.3292  0.0734  1.0160  11.00000  0.05    0.30 
Q3    1   0.2994  0.1139  1.2574  11.00000  0.05    0.29 
Q4    1  -0.1630  0.0102  0.7541  11.00000  0.05    0.28 
Q5    1   0.1856  0.3284  0.7582  11.00000  0.05    0.27 
Q6    1   0.4616 -0.0851  1.0633  11.00000  0.05    0.27 
Q7    1  -0.1878  0.4047  0.8892  11.00000  0.05    0.26 
Q8    1   0.2655  0.2724  0.9279  11.00000  0.05    0.26 
Q9    1   0.2518  0.1869  0.9903  11.00000  0.05    0.26 
Q10   1   0.3172  0.0428  1.1210  11.00000  0.05    0.26 
; 
_shelx_res_checksum   15553 
  
_shelx_hkl_file 
; 
   0   0   1    0.17    0.08 
   0   0   2  197.94    0.84 
   0   0   3    0.10    0.15 
   0   0   4   84.42    0.68 
   0   0   5    0.25    0.42 
   0   0   6    1.47    0.40 
   0   0   7    0.00    0.49 
   0   0   8    7.70    0.61 
   0   0   9    0.07    0.66 
   0   0  10   42.28    1.52 
   0   0  11    1.12    1.25 
   0   0  12    8.17    2.09 
   0   0  13    2.02    1.83 
   0   0  14    6.16    1.49 
   0  -1   0    0.17    0.16 
   0  -1   1   86.09    0.43 
   0  -1   2  131.43    0.97 
   0  -1   3    7.18    0.27 
   0  -1   4   34.97    0.55 
   0  -1   5   26.38    0.61 
   0  -1   6   70.78    0.72 
   0  -1   7    1.24    0.35 
   0  -1   8   78.99    0.86 
   0  -1   9    4.93    0.51 
   0  -1  10   56.22    1.34 
   0  -1  11    0.83    0.75 
   0  -1  12    0.03    1.16 
   0  -1  13    1.03    1.25 
   0  -1  14    1.29    1.03 
   0  -2   0  977.92    4.17 
   0  -2   1   43.79    0.33 
   0  -2   2   28.04    0.74 
   0  -2   3    2.83    0.27 
   0  -2   4    4.54    0.37 
   0  -2   5   10.27    0.83 
   0  -2   6    2.52    0.38 
   0  -2   7   13.33    0.73 
   0  -2   8   34.90    0.60 
   0  -2   9   14.95    0.69 
   0  -2  10   10.09    1.08 
   0  -2  11    0.00    1.03 
   0  -2  12    7.14    1.61 
   0  -2  13    1.94    1.40 
   0  -2  14    6.24    1.43 
   0  -3   0    0.10    0.27 
   0  -3   1   68.84    0.68 
   0  -3   2   60.24    1.08 
   0  -3   3  119.85    1.10 
   0  -3   4   41.64    0.74 
   0  -3   5    4.65    0.61 
   0  -3   6    1.39    0.43 
   0  -3   7    0.40    0.40 
   0  -3   8   14.31    0.66 
   0  -3   9    4.71    0.63 
   0  -3  10    9.41    1.24 
   0  -3  11    1.07    1.24 
   0  -3  12    1.23    1.05 
   0  -3  13    0.65    1.37 
   0  -3  14    0.00    1.44 
   0  -4   0  155.54    2.23 
   0  -4   1   46.69    0.68 
   0  -4   2    4.35    0.49 
   0  -4   3    7.70    0.50 
   0  -4   4   21.64    0.92 
   0  -4   5   37.49    1.31 
   0  -4   6    4.40    0.52 
   0  -4   7   12.03    0.75 
   0  -4   8    5.17    0.52 
   0  -4   9   29.57    1.13 
   0  -4  10    6.19    1.22 
   0  -4  11    9.67    1.24 
   0  -4  12    0.17    1.07 
   0  -4  13    0.00    1.38 
   0  -5   0    0.15    0.38 
   0  -5   1   31.99    0.68 
   0  -5   2    4.45    0.48 
   0  -5   3   48.57    1.00 
   0  -5   4    6.96    0.59 
   0  -5   5   49.28    1.02 
   0  -5   6   28.78    0.96 
   0  -5   7    5.00    0.63 
   0  -5   8    0.64    0.40 
   0  -5   9    5.21    0.87 
   0  -5  10    1.55    1.16 
   0  -5  11    3.56    1.11 
   0  -5  12    1.60    1.13 
   0  -5  13    0.00    1.52 
   0  -6   0   44.07    1.51 
   0  -6   1   57.06    1.03 
   0  -6   2   20.30    0.70 
   0  -6   3   22.82    0.85 
   0  -6   4   48.19    1.13 
   0  -6   5   21.87    1.16 
   0  -6   6    0.26    0.73 
   0  -6   7   19.94    1.20 
   0  -6   8    3.05    0.60 
   0  -6   9   15.52    1.23 
   0  -6  10    0.23    1.12 
   0  -6  11    0.00    0.97 
   0  -6  12    1.45    1.21 
   0  -7   0    0.34    0.68 
   0  -7   1    4.59    0.55 
   0  -7   2    1.34    0.79 
   0  -7   3    5.32    0.94 
   0  -7   4    4.94    0.90 
   0  -7   5    6.43    0.82 
   0  -7   6   51.02    1.65 
   0  -7   7    0.00    0.74 
   0  -7   8   10.27    0.96 
   0  -7   9    0.65    0.78 
   0  -7  10    0.00    1.32 
   0  -7  11    1.79    1.17 
   0  -7  12    0.34    1.31 
   0  -8   0    3.92    1.11 
   0  -8   1    1.15    0.46 
   0  -8   2    4.17    0.87 
   0  -8   3    0.23    0.98 
   0  -8   4    9.36    1.11 
   0  -8   5    1.09    0.92 
   0  -8   6    0.70    1.09 
   0  -8   7    0.00    0.84 
   0  -8   8    0.81    0.60 
   0  -8   9    4.36    0.96 
   0  -8  10    0.00    1.37 
   0  -8  11    0.00    1.16 
   0  -9   0    0.38    0.75 
   0  -9   1    0.44    0.43 
   0  -9   2    0.00    0.87 
   0  -9   3    0.12    1.07 
   0  -9   4   11.44    1.18 
   0  -9   5    0.79    0.93 
   0  -9   6   11.60    1.33 
   0  -9   7    0.71    0.79 
   0  -9   8    1.71    0.73 
   0  -9   9    0.00    0.84 
   0  -9  10    0.00    1.38 
   0 -10   0    1.72    1.13 
   0 -10   1    1.26    0.58 
   0 -10   2    4.28    1.03 
   0 -10   3    4.20    1.26 
   0 -10   4    1.36    1.07 
   0 -10   5    0.00    1.06 
   0 -10   6    1.86    1.23 
   0 -10   7    0.14    0.85 
   0 -10   8    0.28    0.65 
   0 -11   0    0.58    0.95 
   0 -11   1    1.40    0.59 
   0 -11   2    1.75    0.92 
   0 -11   3    3.91    1.35 
   0 -11   4    0.15    1.13 
   0 -11   5    0.00    1.06 
   0 -11   6    0.00    1.47 
   0 -12   0    0.17    1.07 
   0 -12   1    0.53    0.75 
   0 -12   2    0.01    0.88 
   0 -12   3    2.34    1.43 
   0 -12   4    1.66    1.28 
   1   0 -14    0.00    1.11 
   1   0 -13    0.00    1.85 
   1   0 -12    2.70    1.67 
   1   0 -11    0.66    1.18 
   1   0 -10   18.49    1.89 
   1   0  -9    0.38    0.66 
   1   0  -8   18.67    0.81 
   1   0  -7    0.20    0.51 
   1   0  -6   53.27    0.85 
   1   0  -5    0.97    0.44 
   1   0  -4   18.59    0.48 
   1   0  -3    0.21    0.14 
   1   0  -2   67.15    0.49 
   1   0  -1    0.10    0.08 
   1   0   0    0.00    0.07 
   1   0   1    0.19    0.09 
   1   0   2  149.91    1.07 
   1   0   3    0.51    0.23 
   1   0   4  178.53    1.76 
   1   0   5    1.32    0.47 
   1   0   6    8.77    0.60 
   1   0   7    0.26    0.47 
   1   0   8   99.22    1.65 
   1   0   9    0.62    0.62 
   1   0  10    7.89    1.09 
   1   0  11    0.00    1.09 
   1   0  12    1.17    2.07 
   1   0  13    0.00    2.03 
   1   0  14    0.97    1.21 
   1  -1 -14   10.90    1.31 
   1  -1 -13    1.06    1.21 
   1  -1 -12   12.10    1.39 
   1  -1 -11    0.69    0.92 
   1  -1 -10    6.02    0.90 
   1  -1  -9    0.13    0.40 
   1  -1  -8    8.28    0.34 
   1  -1  -7    0.34    0.33 
   1  -1  -6    2.04    0.36 
   1  -1  -5   58.18    1.05 
   1  -1  -4   24.30    0.53 
   1  -1  -3   81.56    0.57 
   1  -1  -2  678.23    1.46 
   1  -1  -1   26.86    0.24 
   1  -1   0  498.12    2.23 
   1  -1   1    0.95    0.10 
   1  -1   2  206.85    0.76 
   1  -1   3   16.90    0.30 
   1  -1   4  111.00    0.88 
   1  -1   5    2.84    0.52 
   1  -1   6   18.98    0.50 
   1  -1   7    0.75    0.39 
   1  -1   8   19.06    0.56 
   1  -1   9    1.44    0.51 
   1  -1  10   24.78    1.02 
   1  -1  11    2.31    1.04 
   1  -1  12    0.00    1.09 
   1  -1  13    0.17    1.20 
   1  -1  14    2.56    1.10 
   1  -2 -14    1.32    1.11 
   1  -2 -13    6.90    1.47 
   1  -2 -12    1.81    1.20 
   1  -2 -11    5.67    1.13 
   1  -2 -10   14.91    1.17 
   1  -2  -9    3.16    0.61 
   1  -2  -8   44.42    0.89 
   1  -2  -7    0.00    0.45 
   1  -2  -6   70.37    1.09 
   1  -2  -5    8.19    0.57 
   1  -2  -4   29.98    0.63 
   1  -2  -3    3.59    0.28 
   1  -2  -2  129.15    0.79 
   1  -2  -1    4.68    0.17 
   1  -2   0  243.37    1.07 
   1  -2   1   21.18    0.27 
   1  -2   2   79.50    0.63 
   1  -2   3   90.49    0.77 
   1  -2   4   47.51    0.68 
   1  -2   5   23.44    0.65 
   1  -2   6   19.22    0.71 
   1  -2   7   12.83    0.57 
   1  -2   8   72.34    0.96 
   1  -2   9    1.12    0.44 
   1  -2  10    0.99    0.85 
   1  -2  11    1.43    1.12 
   1  -2  12    0.56    1.13 
   1  -2  13    0.00    1.32 
   1  -2  14    1.28    1.08 
   1  -3 -14    0.83    1.40 
   1  -3 -13    3.74    1.58 
   1  -3 -12    2.27    1.22 
   1  -3 -11    1.48    1.26 
   1  -3 -10    5.49    1.02 
   1  -3  -9   27.73    1.00 
   1  -3  -8    7.11    0.54 
   1  -3  -7   17.76    0.86 
   1  -3  -6    8.82    0.55 
   1  -3  -5   45.31    1.00 
   1  -3  -4    5.35    0.48 
   1  -3  -3  103.65    1.05 
   1  -3  -2  127.52    1.06 
   1  -3  -1  161.92    0.92 
   1  -3   0  324.62    1.76 
   1  -3   1   71.37    0.67 
   1  -3   2   46.05    0.83 
   1  -3   3    2.33    0.33 
   1  -3   4   40.23    0.71 
   1  -3   5   16.91    0.75 
   1  -3   6   27.70    0.81 
   1  -3   7   29.31    1.04 
   1  -3   8    1.96    0.37 
   1  -3   9   30.03    1.10 
   1  -3  10    6.30    1.23 
   1  -3  11    8.98    1.19 
   1  -3  12    0.10    1.08 
   1  -3  13    0.00    1.14 
   1  -4 -13    4.60    1.66 
   1  -4 -12    1.22    1.57 
   1  -4 -11   11.20    1.62 
   1  -4 -10    4.92    1.18 
   1  -4  -9   15.30    0.92 
   1  -4  -8    0.74    0.39 
   1  -4  -7    1.02    0.50 
   1  -4  -6    2.49    0.44 
   1  -4  -5    7.63    0.59 
   1  -4  -4    4.49    0.54 
   1  -4  -3    2.64    0.44 
   1  -4  -2    7.52    0.49 
   1  -4  -1   97.21    0.99 
   1  -4   0   20.32    0.60 
   1  -4   1  132.99    1.10 
   1  -4   2   38.98    0.95 
   1  -4   3   67.55    0.98 
   1  -4   4   40.99    0.83 
   1  -4   5   10.93    0.69 
   1  -4   6    3.97    0.63 
   1  -4   7    7.69    0.58 
   1  -4   8   11.16    0.64 
   1  -4   9    1.89    0.81 
   1  -4  10    0.81    1.00 
   1  -4  11    0.00    0.98 
   1  -4  12    0.05    1.16 
   1  -4  13    0.00    1.31 
   1  -5 -13    2.84    1.72 
   1  -5 -12    0.57    1.48 
   1  -5 -11    0.96    1.11 
   1  -5 -10    2.34    1.49 
   1  -5  -9   16.64    1.15 
   1  -5  -8    4.30    0.54 
   1  -5  -7    2.20    0.56 
   1  -5  -6   22.30    0.94 
   1  -5  -5   25.65    1.07 
   1  -5  -4    1.08    0.61 
   1  -5  -3   34.31    0.96 
   1  -5  -2    1.88    0.47 
   1  -5  -1   14.99    0.57 
   1  -5   0    4.61    0.42 
   1  -5   1   16.25    0.58 
   1  -5   2    9.52    0.60 
   1  -5   3    0.28    0.38 
   1  -5   4    1.58    0.72 
   1  -5   5    0.79    1.00 
   1  -5   6    2.35    0.63 
   1  -5   7    3.05    0.62 
   1  -5   8    1.10    0.49 
   1  -5   9   24.82    1.33 
   1  -5  10    1.59    1.05 
   1  -5  11    3.32    1.04 
   1  -5  12    0.00    0.99 
   1  -5  13    1.76    1.23 
   1  -6 -12    0.89    1.34 
   1  -6 -11    4.52    1.28 
   1  -6 -10    1.27    1.39 
   1  -6  -9    0.86    0.86 
   1  -6  -8    3.38    0.58 
   1  -6  -7    0.49    0.51 
   1  -6  -6    6.27    0.69 
   1  -6  -5    2.16    0.66 
   1  -6  -4    2.09    0.69 
   1  -6  -3    0.38    0.83 
   1  -6  -2    0.03    0.70 
   1  -6  -1   13.66    0.69 
   1  -6   0    3.23    0.50 
   1  -6   1   24.86    0.79 
   1  -6   2   20.90    0.76 
   1  -6   3   50.06    1.32 
   1  -6   4   14.30    0.80 
   1  -6   5    1.50    0.81 
   1  -6   6    2.19    0.77 
   1  -6   7    2.07    0.73 
   1  -6   8    1.09    0.53 
   1  -6   9    0.00    0.80 
   1  -6  10    0.00    1.19 
   1  -6  11    0.28    1.07 
   1  -6  12    1.89    1.10 
   1  -7 -12    3.13    1.71 
   1  -7 -11    3.37    1.30 
   1  -7 -10    4.66    1.63 
   1  -7  -9    8.32    1.13 
   1  -7  -8    8.93    0.87 
   1  -7  -7    1.59    0.73 
   1  -7  -6    0.00    0.81 
   1  -7  -5    0.41    0.67 
   1  -7  -4    4.35    0.84 
   1  -7  -3    6.04    0.90 
   1  -7  -2    8.35    0.77 
   1  -7  -1    2.62    0.46 
   1  -7   0   10.92    0.78 
   1  -7   1   18.22    0.84 
   1  -7   2   30.25    1.23 
   1  -7   3    0.00    0.79 
   1  -7   4    4.12    0.93 
   1  -7   5    4.98    0.87 
   1  -7   6    4.81    1.12 
   1  -7   7    0.63    0.77 
   1  -7   8    4.72    0.80 
   1  -7   9    5.62    1.01 
   1  -7  10    0.00    1.21 
   1  -7  11    0.29    1.12 
   1  -8 -11    2.08    1.37 
   1  -8 -10    3.29    1.42 
   1  -8  -9    0.93    0.77 
   1  -8  -8   10.49    0.99 
   1  -8  -7    5.24    0.90 
   1  -8  -6   16.33    1.19 
   1  -8  -5    1.67    0.89 
   1  -8  -4    1.15    0.95 
   1  -8  -3    1.46    1.01 
   1  -8  -2    1.70    0.87 
   1  -8  -1   11.17    0.81 
   1  -8   0    2.41    0.67 
   1  -8   1    2.22    0.51 
   1  -8   2    2.91    0.79 
   1  -8   3    0.28    0.96 
   1  -8   4    8.82    1.04 
   1  -8   5    0.67    0.94 
   1  -8   6    2.97    1.40 
   1  -8   7    0.79    0.85 
   1  -8   8    2.30    0.69 
   1  -8   9    0.00    0.98 
   1  -8  10    0.00    1.38 
   1  -8  11    0.00    1.45 
   1  -9 -10    1.19    1.41 
   1  -9  -9    1.04    0.84 
   1  -9  -8    1.47    0.70 
   1  -9  -7    0.31    0.85 
   1  -9  -6    3.68    1.03 
   1  -9  -5    1.47    0.98 
   1  -9  -4    0.62    1.05 
   1  -9  -3    1.18    1.05 
   1  -9  -2    1.26    0.87 
   1  -9  -1    0.74    0.47 
   1  -9   0   10.35    1.12 
   1  -9   1    3.65    0.63 
   1  -9   2    9.00    1.12 
   1  -9   3    0.00    1.11 
   1  -9   4   11.68    1.26 
   1  -9   5    1.62    1.02 
   1  -9   6    3.44    1.41 
   1  -9   7    0.44    0.81 
   1  -9   8    1.01    0.73 
   1  -9   9    0.82    0.92 
   1 -10  -8    1.73    0.72 
   1 -10  -7    1.05    0.85 
   1 -10  -6    1.20    1.04 
   1 -10  -5    0.29    0.95 
   1 -10  -4    0.54    1.11 
   1 -10  -3    0.00    1.23 
   1 -10  -2    1.92    1.02 
   1 -10  -1    1.91    0.61 
   1 -10   0    5.96    0.99 
   1 -10   1    2.55    0.64 
   1 -10   2    2.41    0.94 
   1 -10   3    1.44    1.21 
   1 -10   4    0.12    0.99 
   1 -10   5    0.48    1.11 
   1 -10   6    0.00    1.27 
   1 -10   7    1.94    0.98 
   1 -10   8    0.10    0.63 
   1 -11  -6    1.45    1.14 
   1 -11  -5    0.13    1.04 
   1 -11  -4    0.03    1.10 
   1 -11  -3    0.00    1.32 
   1 -11  -2    0.22    0.88 
   1 -11  -1    0.47    0.53 
   1 -11   0    0.43    0.64 
   1 -11   1    1.12    0.62 
   1 -11   2    0.78    0.96 
   1 -11   3    1.72    1.22 
   1 -11   4    0.25    1.09 
   1 -11   5    0.00    1.08 
   1 -11   6    0.00    1.42 
   1 -12  -4    0.28    1.14 
   1 -12  -3    0.51    1.42 
   1 -12  -2    1.10    0.90 
   1 -12  -1    0.56    0.80 
   1 -12   0    0.29    0.71 
   1 -12   1    0.28    0.73 
   1 -12   2    0.00    0.94 
   1 -12   3    1.58    1.41 
   2   0 -14    5.95    1.50 
   2   0 -13    0.00    1.83 
   2   0 -12    0.00    1.55 
   2   0 -11    0.00    1.27 
   2   0 -10   30.25    2.58 
   2   0  -9    0.12    0.65 
   2   0  -8    3.92    0.45 
   2   0  -7    0.03    0.47 
   2   0  -6   48.91    0.88 
   2   0  -5    0.15    0.29 
   2   0  -4    0.00    0.36 
   2   0  -3    0.32    0.19 
   2   0  -2  360.70    1.34 
   2   0  -1    0.34    0.08 
   2   0   0   41.37    0.46 
   2   0   1    0.20    0.09 
   2   0   2    2.48    0.71 
   2   0   3    0.17    0.23 
   2   0   4   55.26    0.79 
   2   0   5    0.20    0.47 
   2   0   6   36.89    0.98 
   2   0   7    0.50    0.51 
   2   0   8    0.29    0.41 
   2   0   9    0.00    0.66 
   2   0  10    1.47    0.84 
   2   0  11    0.69    1.68 
   2   0  12    8.53    4.29 
   2   0  13    0.91    4.08 
   2   0  14    0.35    4.17 
   2  -1 -14    2.80    1.04 
   2  -1 -13    0.69    1.20 
   2  -1 -12    0.00    1.21 
   2  -1 -11    0.00    0.93 
   2  -1 -10    4.58    0.92 
   2  -1  -9    1.17    0.41 
   2  -1  -8   19.51    0.37 
   2  -1  -7    0.07    0.34 
   2  -1  -6    0.97    0.31 
   2  -1  -5    0.56    0.49 
   2  -1  -4    3.48    0.36 
   2  -1  -3   41.04    0.39 
   2  -1  -2   93.77    0.63 
   2  -1  -1  129.18    0.41 
   2  -1   0   41.18    0.35 
   2  -1   1   64.93    0.28 
   2  -1   2   57.58    0.37 
   2  -1   3   30.32    0.31 
   2  -1   4    0.91    0.28 
   2  -1   5   17.38    0.64 
   2  -1   6    1.89    0.30 
   2  -1   7    0.29    0.34 
   2  -1   8   30.94    0.68 
   2  -1   9    2.15    0.51 
   2  -1  10    1.24    0.65 
   2  -1  11    0.00    0.96 
   2  -1  12    7.14    1.62 
   2  -1  13    0.92    2.54 
   2  -1  14    0.00    1.59 
   2  -2 -14    4.05    1.11 
   2  -2 -13    0.00    1.25 
   2  -2 -12    0.78    1.19 
   2  -2 -11    0.00    0.98 
   2  -2 -10    6.45    0.95 
   2  -2  -9    7.44    0.60 
   2  -2  -8    1.66    0.35 
   2  -2  -7    5.18    0.47 
   2  -2  -6   95.45    1.18 
   2  -2  -5   50.41    0.85 
   2  -2  -4    0.50    0.29 
   2  -2  -3   25.05    0.51 
   2  -2  -2    8.94    0.58 
   2  -2  -1    0.36    0.12 
   2  -2   0   27.14    0.37 
   2  -2   1   25.53    0.30 
   2  -2   2   76.00    0.89 
   2  -2   3   75.83    0.70 
   2  -2   4  165.47    0.99 
   2  -2   5    3.22    0.47 
   2  -2   6   40.53    0.77 
   2  -2   7    3.61    0.60 
   2  -2   8    8.95    0.48 
   2  -2   9    9.47    0.60 
   2  -2  10    0.00    0.87 
   2  -2  11    2.71    1.10 
   2  -2  12    0.00    0.89 
   2  -2  13    0.00    1.05 
   2  -2  14    5.30    2.03 
   2  -3 -14    2.54    1.23 
   2  -3 -13    8.08    1.47 
   2  -3 -12    2.49    1.09 
   2  -3 -11   26.92    1.61 
   2  -3 -10    3.25    0.90 
   2  -3  -9   13.72    0.93 
   2  -3  -8    5.42    0.51 
   2  -3  -7   26.24    0.89 
   2  -3  -6   13.62    0.61 
   2  -3  -5   18.49    0.63 
   2  -3  -4   13.30    0.61 
   2  -3  -3    0.66    0.28 
   2  -3  -2   56.05    0.79 
   2  -3  -1   39.55    0.51 
   2  -3   0    5.27    0.29 
   2  -3   1   69.09    0.62 
   2  -3   2    1.37    0.38 
   2  -3   3   97.30    0.91 
   2  -3   4   27.42    0.70 
   2  -3   5   17.71    0.79 
   2  -3   6    1.22    0.51 
   2  -3   7   32.31    1.02 
   2  -3   8   15.52    0.73 
   2  -3   9    3.37    0.76 
   2  -3  10    0.00    0.86 
   2  -3  11    4.91    1.02 
   2  -3  12    0.94    0.95 
   2  -3  13    0.00    1.20 
   2  -4 -13    2.58    1.75 
   2  -4 -12    0.81    1.29 
   2  -4 -11    9.26    1.67 
   2  -4 -10    1.11    1.12 
   2  -4  -9    1.84    0.61 
   2  -4  -8    4.25    0.51 
   2  -4  -7    0.42    0.50 
   2  -4  -6    2.70    0.48 
   2  -4  -5   96.27    1.41 
   2  -4  -4   57.82    0.96 
   2  -4  -3   67.10    0.98 
   2  -4  -2   59.18    0.95 
   2  -4  -1   42.23    0.64 
   2  -4   0   38.48    0.69 
   2  -4   1    8.73    0.42 
   2  -4   2   46.12    0.73 
   2  -4   3   41.60    0.87 
   2  -4   4   16.98    0.74 
   2  -4   5    0.00    0.53 
   2  -4   6    0.89    0.65 
   2  -4   7    8.21    0.74 
   2  -4   8    5.99    0.59 
   2  -4   9   24.27    1.30 
   2  -4  10    0.04    0.86 
   2  -4  11    4.39    1.16 
   2  -4  12    0.25    1.05 
   2  -4  13    0.00    1.35 
   2  -5 -13    2.15    1.86 
   2  -5 -12    0.90    1.61 
   2  -5 -11    9.78    1.58 
   2  -5 -10    2.43    1.75 
   2  -5  -9    3.73    0.92 
   2  -5  -8    0.44    0.40 
   2  -5  -7    0.84    0.56 
   2  -5  -6    0.00    0.50 
   2  -5  -5    0.00    0.98 
   2  -5  -4    0.48    0.58 
   2  -5  -3    2.29    0.45 
   2  -5  -2    7.42    0.62 
   2  -5  -1   29.27    0.65 
   2  -5   0   23.99    0.72 
   2  -5   1    8.06    0.50 
   2  -5   2    8.35    0.66 
   2  -5   3   17.70    0.69 
   2  -5   4    2.38    0.60 
   2  -5   5   20.96    0.91 
   2  -5   6   22.90    0.98 
   2  -5   7   14.86    0.87 
   2  -5   8    5.08    0.68 
   2  -5   9    0.93    0.71 
   2  -5  10    0.00    1.13 
   2  -5  11    1.27    1.07 
   2  -5  12    1.25    1.16 
   2  -5  13    0.00    1.14 
   2  -6 -12    7.42    1.96 
   2  -6 -11    3.37    1.40 
   2  -6 -10    4.50    1.58 
   2  -6  -9    4.26    0.98 
   2  -6  -8    7.47    0.72 
   2  -6  -7    0.18    0.50 
   2  -6  -6    0.00    0.57 
   2  -6  -5   29.63    1.16 
   2  -6  -4    1.05    1.07 
   2  -6  -3   41.34    1.33 
   2  -6  -2    2.42    0.75 
   2  -6  -1    2.17    0.41 
   2  -6   0    1.24    0.43 
   2  -6   1    9.23    0.57 
   2  -6   2    2.49    0.82 
   2  -6   3    7.77    0.84 
   2  -6   4    2.77    0.79 
   2  -6   5    0.81    0.65 
   2  -6   6    4.44    0.79 
   2  -6   7   11.06    1.05 
   2  -6   8    6.99    0.79 
   2  -6   9    2.48    0.91 
   2  -6  10    2.03    1.17 
   2  -6  11    0.00    1.13 
   2  -6  12    0.87    1.16 
   2  -7 -12    0.00    1.68 
   2  -7 -11    1.87    1.27 
   2  -7 -10    1.63    1.38 
   2  -7  -9    0.35    0.77 
   2  -7  -8    3.50    0.67 
   2  -7  -7    0.00    0.71 
   2  -7  -6    0.83    0.82 
   2  -7  -5    0.00    0.74 
   2  -7  -4    4.03    0.84 
   2  -7  -3    1.13    0.74 
   2  -7  -2   24.65    1.19 
   2  -7  -1    4.78    0.53 
   2  -7   0   32.07    1.16 
   2  -7   1    1.30    0.40 
   2  -7   2    7.82    0.85 
   2  -7   3    1.06    0.78 
   2  -7   4    2.04    0.75 
   2  -7   5    2.26    0.82 
   2  -7   6    0.00    1.02 
   2  -7   7    7.30    0.99 
   2  -7   8    1.34    0.63 
   2  -7   9    0.00    0.83 
   2  -7  10    5.18    1.30 
   2  -7  11    3.81    1.24 
   2  -8 -11    0.00    1.25 
   2  -8 -10    5.10    1.59 
   2  -8  -9    0.02    0.81 
   2  -8  -8    5.30    0.78 
   2  -8  -7    0.00    0.90 
   2  -8  -6    0.00    1.08 
   2  -8  -5    0.40    0.83 
   2  -8  -4    2.14    1.07 
   2  -8  -3    1.67    0.95 
   2  -8  -2    0.00    0.75 
   2  -8  -1    0.88    0.45 
   2  -8   0    0.21    0.46 
   2  -8   1    0.40    0.43 
   2  -8   2    1.99    0.90 
   2  -8   3    3.38    0.93 
   2  -8   4    3.63    0.97 
   2  -8   5    0.27    0.90 
   2  -8   6   13.17    1.44 
   2  -8   7    1.59    1.07 
   2  -8   8   12.18    1.02 
   2  -8   9    1.49    0.97 
   2  -8  10    0.61    1.49 
   2  -9 -10    0.10    1.46 
   2  -9  -9    1.21    0.94 
   2  -9  -8    1.40    0.67 
   2  -9  -7    2.32    0.89 
   2  -9  -6    0.00    0.98 
   2  -9  -5    0.00    0.89 
   2  -9  -4    0.00    1.11 
   2  -9  -3    3.18    1.10 
   2  -9  -2    5.76    1.09 
   2  -9  -1    5.32    0.75 
   2  -9   0   13.27    1.23 
   2  -9   1    0.04    0.46 
   2  -9   2    2.30    0.85 
   2  -9   3    1.69    1.02 
   2  -9   4    2.69    0.94 
   2  -9   5    0.00    0.98 
   2  -9   6    0.28    1.35 
   2  -9   7    0.23    0.96 
   2  -9   8    0.81    0.63 
   2  -9   9    1.98    1.00 
   2 -10  -8    1.30    0.72 
   2 -10  -7    0.42    0.87 
   2 -10  -6    0.00    0.95 
   2 -10  -5    2.94    1.10 
   2 -10  -4    0.48    1.01 
   2 -10  -3    2.13    1.20 
   2 -10  -2    0.00    0.89 
   2 -10  -1    8.65    0.89 
   2 -10   0    4.80    0.93 
   2 -10   1   12.66    1.02 
   2 -10   2    1.94    1.12 
   2 -10   3    4.35    1.13 
   2 -10   4    0.00    1.08 
   2 -10   5    1.40    1.06 
   2 -10   6    0.00    1.32 
   2 -10   7    0.49    0.94 
   2 -10   8    1.62    0.73 
   2 -11  -6    0.00    1.06 
   2 -11  -5    0.92    1.06 
   2 -11  -4    1.31    1.05 
   2 -11  -3    0.00    1.14 
   2 -11  -2    2.08    0.94 
   2 -11  -1    2.10    0.76 
   2 -11   0    0.76    0.70 
   2 -11   1    0.80    0.63 
   2 -11   2    0.50    0.91 
   2 -11   3    4.42    1.24 
   2 -11   4    0.91    1.13 
   2 -11   5    1.81    1.14 
   2 -11   6    1.04    1.42 
   2 -12  -4    0.00    1.21 
   2 -12  -3    4.99    1.31 
   2 -12  -2    1.80    0.96 
   2 -12  -1    0.94    0.82 
   2 -12   0    1.72    0.89 
   2 -12   1    1.11    0.81 
   2 -12   2    0.58    0.96 
   2 -12   3    1.40    1.39 
   3   0 -14    6.54    1.54 
   3   0 -13    0.00    1.77 
   3   0 -12    8.46    1.73 
   3   0 -11    0.00    1.26 
   3   0 -10    0.63    1.85 
   3   0  -9    0.04    0.70 
   3   0  -8   22.69    0.84 
   3   0  -7    0.57    0.48 
   3   0  -6   18.99    0.66 
   3   0  -5    0.31    0.37 
   3   0  -4  237.36    1.56 
   3   0  -3    0.33    0.20 
   3   0  -2 1000.00    2.19 
   3   0  -1    0.07    0.09 
   3   0   0  647.82    3.48 
   3   0   1    0.38    0.12 
   3   0   2  100.94    0.87 
   3   0   3    0.35    0.23 
   3   0   4    6.68    0.56 
   3   0   5    1.32    0.47 
   3   0   6    0.74    0.58 
   3   0   7    0.00    0.43 
   3   0   8   12.08    0.74 
   3   0   9    0.55    0.60 
   3   0  10    0.16    0.78 
   3   0  11    0.00    2.01 
   3   0  12   14.05    3.42 
   3   0  13    3.33    2.86 
   3   0  14    7.89    5.50 
   3  -1 -14    4.59    0.96 
   3  -1 -13    2.13    1.29 
   3  -1 -12    1.11    1.14 
   3  -1 -11    3.46    0.96 
   3  -1 -10   23.29    1.28 
   3  -1  -9    1.01    0.41 
   3  -1  -8   20.27    0.48 
   3  -1  -7    1.38    0.36 
   3  -1  -6  127.05    0.82 
   3  -1  -5   56.97    0.74 
   3  -1  -4   43.41    0.63 
   3  -1  -3    1.34    0.15 
   3  -1  -2    7.01    0.29 
   3  -1  -1   24.51    0.20 
   3  -1   1   85.89    0.42 
   3  -1   2    0.33    0.18 
   3  -1   3    4.01    0.24 
   3  -1   4   80.80    0.76 
   3  -1   5    0.70    0.35 
   3  -1   6   60.70    0.84 
   3  -1   7    0.20    0.40 
   3  -1   8   16.12    0.61 
   3  -1   9    1.68    0.56 
   3  -1  10   11.19    1.54 
   3  -1  11    0.00    1.21 
   3  -1  12    0.90    1.11 
   3  -1  13    0.37    1.86 
   3  -1  14    1.79    2.02 
   3  -2 -14    0.49    1.04 
   3  -2 -13    1.76    1.26 
   3  -2 -12    3.74    1.19 
   3  -2 -11    8.28    1.02 
   3  -2 -10    5.99    1.22 
   3  -2  -9    3.62    0.63 
   3  -2  -8    0.20    0.28 
   3  -2  -7   14.19    0.76 
   3  -2  -6    3.67    0.39 
   3  -2  -5    2.44    0.62 
   3  -2  -4   11.49    0.51 
   3  -2  -3   15.16    0.46 
   3  -2  -2  103.71    0.90 
   3  -2  -1    0.90    0.13 
   3  -2   0  150.27    0.86 
   3  -2   1    1.72    0.13 
   3  -2   2   16.09    0.36 
   3  -2   3   30.56    0.48 
   3  -2   4   23.52    0.70 
   3  -2   5    1.86    0.42 
   3  -2   6    1.18    0.33 
   3  -2   7   15.78    0.65 
   3  -2   8    0.82    0.31 
   3  -2   9    4.19    0.67 
   3  -2  10    0.00    0.96 
   3  -2  11    8.71    1.46 
   3  -2  12   14.85    2.04 
   3  -2  13    0.00    1.74 
   3  -3 -14    1.49    1.15 
   3  -3 -13    0.61    1.24 
   3  -3 -12    0.00    1.06 
   3  -3 -11    3.39    1.49 
   3  -3 -10    1.17    1.06 
   3  -3  -9    3.46    0.96 
   3  -3  -8    9.58    0.58 
   3  -3  -7    0.00    0.43 
   3  -3  -6   20.47    0.72 
   3  -3  -5   18.35    0.78 
   3  -3  -4    3.48    0.42 
   3  -3  -3   23.86    0.63 
   3  -3  -2    7.24    0.40 
   3  -3  -1   53.86    0.59 
   3  -3   0   29.57    0.79 
   3  -3   1   23.51    0.45 
   3  -3   2    2.56    0.34 
   3  -3   3   59.27    0.91 
   3  -3   4   40.98    0.78 
   3  -3   5    1.37    0.60 
   3  -3   6    1.56    0.51 
   3  -3   7    4.46    0.56 
   3  -3   8    1.47    0.38 
   3  -3   9    1.20    0.64 
   3  -3  10    0.00    1.15 
   3  -3  11    0.00    1.31 
   3  -3  12    0.00    1.14 
   3  -3  13    0.56    1.14 
   3  -4 -13    1.74    1.32 
   3  -4 -12    0.00    1.23 
   3  -4 -11    8.08    1.59 
   3  -4 -10    1.26    1.19 
   3  -4  -9    5.54    0.90 
   3  -4  -8    1.02    0.39 
   3  -4  -7   11.10    0.78 
   3  -4  -6    2.37    0.51 
   3  -4  -5    9.72    0.72 
   3  -4  -4    3.94    0.65 
   3  -4  -3   19.67    0.82 
   3  -4  -2    8.85    0.66 
   3  -4  -1   25.47    0.49 
   3  -4   0   25.86    0.57 
   3  -4   1    1.00    0.26 
   3  -4   2    4.88    0.45 
   3  -4   3   23.02    0.65 
   3  -4   4    4.62    0.59 
   3  -4   5   18.20    0.89 
   3  -4   6    1.99    0.61 
   3  -4   7   10.24    0.82 
   3  -4   8    4.87    0.57 
   3  -4   9    4.43    1.11 
   3  -4  10    0.96    0.91 
   3  -4  11   15.78    1.34 
   3  -4  12    2.32    1.14 
   3  -4  13    0.00    1.42 
   3  -5 -13    0.70    2.00 
   3  -5 -12    1.56    1.52 
   3  -5 -11    4.26    1.50 
   3  -5 -10    5.00    1.50 
   3  -5  -9    1.89    1.08 
   3  -5  -8    1.47    0.44 
   3  -5  -7    1.75    0.63 
   3  -5  -6    6.26    0.81 
   3  -5  -5   59.48    1.10 
   3  -5  -4   21.19    0.76 
   3  -5  -3    1.41    0.54 
   3  -5  -2   16.54    0.69 
   3  -5  -1   10.73    0.58 
   3  -5   0    0.71    0.38 
   3  -5   1   29.10    0.76 
   3  -5   2    1.88    0.61 
   3  -5   3   46.23    1.07 
   3  -5   4    0.32    0.62 
   3  -5   5    0.97    0.64 
   3  -5   6   15.56    0.87 
   3  -5   7    0.75    0.64 
   3  -5   8    2.77    0.56 
   3  -5   9    3.67    0.86 
   3  -5  10    1.33    1.28 
   3  -5  11    0.00    1.16 
   3  -5  12    1.87    1.16 
   3  -6 -12    0.00    1.94 
   3  -6 -11    1.00    1.49 
   3  -6 -10    1.46    1.54 
   3  -6  -9    0.92    0.87 
   3  -6  -8    0.70    0.48 
   3  -6  -7   13.95    1.08 
   3  -6  -6    0.64    0.68 
   3  -6  -5    9.48    0.77 
   3  -6  -4    5.17    0.78 
   3  -6  -3    9.90    0.82 
   3  -6  -2   25.53    0.85 
   3  -6  -1    6.45    0.53 
   3  -6   0  110.50    1.89 
   3  -6   1   13.78    0.68 
   3  -6   2    9.42    0.78 
   3  -6   3   37.77    1.17 
   3  -6   4   13.56    0.84 
   3  -6   5   10.91    0.84 
   3  -6   6    7.75    0.83 
   3  -6   7    9.16    0.99 
   3  -6   8    0.39    0.51 
   3  -6   9    1.69    0.87 
   3  -6  10    5.59    1.42 
   3  -6  11    3.08    1.15 
   3  -6  12    0.00    1.21 
   3  -7 -12    2.09    1.81 
   3  -7 -11    1.92    1.41 
   3  -7 -10    1.74    1.76 
   3  -7  -9    2.11    1.16 
   3  -7  -8   10.51    0.92 
   3  -7  -7    1.49    0.77 
   3  -7  -6   10.87    1.47 
   3  -7  -5    2.30    0.77 
   3  -7  -4    8.31    0.86 
   3  -7  -3    0.20    0.74 
   3  -7  -2   11.77    0.84 
   3  -7  -1    0.66    0.42 
   3  -7   0    0.22    0.39 
   3  -7   1    0.41    0.40 
   3  -7   2    8.00    1.00 
   3  -7   3    3.47    0.71 
   3  -7   4    3.49    0.83 
   3  -7   5    1.95    0.81 
   3  -7   6   21.28    1.26 
   3  -7   7    1.86    0.82 
   3  -7   8   13.60    1.08 
   3  -7   9    1.35    0.89 
   3  -7  10    7.52    1.50 
   3  -7  11    0.00    1.20 
   3  -8 -11    1.55    1.33 
   3  -8 -10    0.00    1.50 
   3  -8  -9    0.00    0.76 
   3  -8  -8    0.59    0.61 
   3  -8  -7    2.47    0.84 
   3  -8  -6    1.64    1.01 
   3  -8  -5    1.12    0.88 
   3  -8  -4    0.29    0.96 
   3  -8  -3    0.00    0.84 
   3  -8  -2    9.35    0.85 
   3  -8  -1    6.84    0.68 
   3  -8   0    9.19    0.88 
   3  -8   1    3.50    0.58 
   3  -8   2    2.52    0.78 
   3  -8   3    1.29    0.84 
   3  -8   4    4.34    0.94 
   3  -8   5    1.77    0.96 
   3  -8   6   12.19    1.46 
   3  -8   7    0.00    0.94 
   3  -8   8    2.08    0.65 
   3  -8   9    1.80    0.95 
   3  -8  10    0.16    1.53 
   3  -9 -10    0.52    1.57 
   3  -9  -9    0.02    0.83 
   3  -9  -8    1.51    0.72 
   3  -9  -7    0.15    0.86 
   3  -9  -6    0.00    1.24 
   3  -9  -5    0.00    0.94 
   3  -9  -4    4.83    1.20 
   3  -9  -3    0.00    0.93 
   3  -9  -2    0.17    0.80 
   3  -9  -1    0.46    0.55 
   3  -9   0    0.57    0.59 
   3  -9   1    0.99    0.60 
   3  -9   2    0.00    0.86 
   3  -9   3    2.14    1.00 
   3  -9   4    0.75    1.08 
   3  -9   5    1.33    1.20 
   3  -9   6    4.48    1.44 
   3  -9   7    0.71    1.01 
   3  -9   8    1.16    0.66 
   3  -9   9    0.34    1.00 
   3 -10  -8    1.10    0.68 
   3 -10  -7    1.36    0.89 
   3 -10  -6    0.00    1.12 
   3 -10  -5    2.18    1.04 
   3 -10  -4    0.74    0.89 
   3 -10  -3    0.00    0.99 
   3 -10  -2    9.63    1.10 
   3 -10  -1    2.27    0.73 
   3 -10   0    2.12    0.76 
   3 -10   1    0.29    0.62 
   3 -10   2    1.41    0.88 
   3 -10   3    0.00    1.08 
   3 -10   4    1.53    1.12 
   3 -10   5    2.72    1.21 
   3 -10   6    1.35    1.36 
   3 -10   7    0.00    1.08 
   3 -10   8    0.73    0.73 
   3 -11  -6    0.30    1.28 
   3 -11  -5    1.09    1.07 
   3 -11  -4    0.33    0.99 
   3 -11  -3    0.00    1.13 
   3 -11  -2    0.07    0.89 
   3 -11  -1    5.82    1.05 
   3 -11   0    0.39    0.66 
   3 -11   1    2.70    0.94 
   3 -11   2    0.25    0.87 
   3 -11   3    5.07    1.32 
   3 -11   4    0.71    1.13 
   3 -11   5    2.68    1.18 
   3 -11   6    1.06    1.74 
   3 -12  -3    3.92    1.28 
   3 -12  -2    0.53    0.92 
   3 -12  -1    0.95    0.94 
   3 -12   0    0.24    0.69 
   3 -12   1    1.73    1.00 
   3 -12   2    0.45    1.01 
   3 -12   3    1.08    1.39 
   4   0 -14    3.01    1.71 
   4   0 -13    0.44    1.83 
   4   0 -12    0.95    1.70 
   4   0 -11    0.00    1.13 
   4   0 -10   13.77    1.20 
   4   0  -9    0.99    0.67 
   4   0  -8   17.22    0.82 
   4   0  -7    0.07    0.46 
   4   0  -6    5.10    0.49 
   4   0  -5    0.57    0.43 
   4   0  -4    0.46    0.36 
   4   0  -3    0.27    0.20 
   4   0  -2   60.89    0.78 
   4   0  -1    0.29    0.13 
   4   0   0   67.77    0.64 
   4   0   1    0.20    0.12 
   4   0   2   24.01    0.66 
   4   0   3    0.17    0.26 
   4   0   4  121.13    1.55 
   4   0   5    0.00    0.65 
   4   0   6    4.23    0.57 
   4   0   7    0.53    0.55 
   4   0   8    0.34    0.39 
   4   0   9    0.00    0.69 
   4   0  10    8.09    1.10 
   4   0  11    0.00    1.51 
   4   0  12    7.99    2.07 
   4   0  13    3.50    2.31 
   4  -1 -14    2.62    1.15 
   4  -1 -13    1.59    1.21 
   4  -1 -12    5.75    1.38 
   4  -1 -11    0.00    0.99 
   4  -1 -10    0.04    0.94 
   4  -1  -9    0.33    0.51 
   4  -1  -8   22.32    0.51 
   4  -1  -7    3.24    0.36 
   4  -1  -6   28.29    0.51 
   4  -1  -5   43.86    0.66 
   4  -1  -4    4.71    0.30 
   4  -1  -3   56.41    0.48 
   4  -1  -2   27.43    0.24 
   4  -1  -1   21.45    0.28 
   4  -1   0  101.49    0.65 
   4  -1   1    5.57    0.18 
   4  -1   2  190.18    0.75 
   4  -1   3    1.58    0.20 
   4  -1   4    2.50    0.48 
   4  -1   5    0.42    0.39 
   4  -1   6    1.07    0.39 
   4  -1   7    2.29    0.44 
   4  -1   8    5.17    0.49 
   4  -1   9    0.00    0.58 
   4  -1  10    2.63    0.75 
   4  -1  11    3.56    1.23 
   4  -1  12   10.33    1.70 
   4  -1  13    0.00    2.01 
   4  -2 -14    0.00    1.14 
   4  -2 -13    2.95    1.25 
   4  -2 -12    0.00    1.16 
   4  -2 -11    8.47    1.17 
   4  -2 -10    9.65    1.06 
   4  -2  -9    6.03    0.66 
   4  -2  -8   32.13    0.71 
   4  -2  -7    2.40    0.60 
   4  -2  -6   20.88    0.65 
   4  -2  -5    1.75    0.49 
   4  -2  -4   18.67    0.58 
   4  -2  -3    0.12    0.26 
   4  -2  -2   10.93    0.31 
   4  -2  -1    2.60    0.17 
   4  -2   0   15.42    0.33 
   4  -2   1    5.91    0.22 
   4  -2   2   57.79    0.53 
   4  -2   3   53.09    0.55 
   4  -2   4   53.73    0.64 
   4  -2   5   14.69    0.72 
   4  -2   6    4.44    0.48 
   4  -2   7    4.92    0.46 
   4  -2   8    0.99    0.31 
   4  -2   9    1.62    0.61 
   4  -2  10    0.74    1.00 
   4  -2  11    0.00    1.28 
   4  -2  12    7.01    1.77 
   4  -2  13    0.08    1.72 
   4  -3 -14    0.00    1.18 
   4  -3 -13    0.01    1.41 
   4  -3 -12    0.00    1.13 
   4  -3 -11    4.90    1.18 
   4  -3 -10    0.03    1.20 
   4  -3  -9    0.00    0.61 
   4  -3  -8   11.36    0.62 
   4  -3  -7   35.64    1.10 
   4  -3  -6   10.96    0.75 
   4  -3  -5   23.84    0.82 
   4  -3  -4    3.01    0.52 
   4  -3  -3   54.32    0.86 
   4  -3  -2    0.00    0.33 
   4  -3  -1    0.39    0.19 
   4  -3   0    1.51    0.25 
   4  -3   1    0.68    0.21 
   4  -3   2   58.57    0.64 
   4  -3   3   16.07    0.53 
   4  -3   4    8.48    0.55 
   4  -3   5    0.95    0.53 
   4  -3   6    0.79    0.47 
   4  -3   7   23.05    1.15 
   4  -3   8    1.36    0.44 
   4  -3   9    8.45    0.95 
   4  -3  10    1.18    0.95 
   4  -3  11    6.78    1.78 
   4  -3  12    2.40    1.69 
   4  -3  13    2.97    1.69 
   4  -4 -13    2.28    1.61 
   4  -4 -12    0.07    1.54 
   4  -4 -11    9.99    1.49 
   4  -4 -10    0.00    1.21 
   4  -4  -9    9.54    1.10 
   4  -4  -8    2.28    0.42 
   4  -4  -7    0.00    0.58 
   4  -4  -6   12.83    0.73 
   4  -4  -5    3.30    0.55 
   4  -4  -4   13.33    0.75 
   4  -4  -3    1.76    0.51 
   4  -4  -2    2.52    0.44 
   4  -4  -1   21.90    0.50 
   4  -4   0   36.25    0.76 
   4  -4   1   30.03    0.59 
   4  -4   2   14.13    0.55 
   4  -4   3    5.85    0.65 
   4  -4   4    1.36    0.55 
   4  -4   5    6.38    0.81 
   4  -4   6    0.13    0.64 
   4  -4   7    2.82    0.65 
   4  -4   8    2.56    0.49 
   4  -4   9    3.10    0.76 
   4  -4  10    0.00    1.14 
   4  -4  11    0.00    1.16 
   4  -4  12    2.43    1.49 
   4  -4  13    0.61    2.05 
   4  -5 -13    0.02    1.76 
   4  -5 -12    0.42    1.34 
   4  -5 -11    2.31    1.12 
   4  -5 -10    0.00    1.18 
   4  -5  -9    0.00    0.84 
   4  -5  -8    0.34    0.40 
   4  -5  -7    5.32    0.64 
   4  -5  -6    0.28    0.55 
   4  -5  -5   11.93    0.90 
   4  -5  -4    0.46    0.57 
   4  -5  -3    7.78    0.92 
   4  -5  -2    9.23    0.61 
   4  -5  -1   12.30    0.57 
   4  -5   0   16.21    0.73 
   4  -5   1   23.22    0.69 
   4  -5   2    1.03    0.44 
   4  -5   3    0.24    0.48 
   4  -5   4   16.78    0.83 
   4  -5   5    1.68    0.62 
   4  -5   6   15.13    0.89 
   4  -5   7    0.95    0.68 
   4  -5   8    0.82    0.48 
   4  -5   9    5.73    1.01 
   4  -5  10    2.66    1.02 
   4  -5  11    4.74    1.26 
   4  -5  12    0.50    1.17 
   4  -6 -12    2.34    1.43 
   4  -6 -11    1.48    1.44 
   4  -6 -10    1.24    1.26 
   4  -6  -9    0.58    1.20 
   4  -6  -8    1.90    0.52 
   4  -6  -7    2.65    0.68 
   4  -6  -6    4.22    0.76 
   4  -6  -5    0.32    0.62 
   4  -6  -4   11.47    0.77 
   4  -6  -3    0.00    1.21 
   4  -6  -2   12.11    0.76 
   4  -6  -1    1.55    0.40 
   4  -6   0    5.23    0.57 
   4  -6   1    2.98    0.44 
   4  -6   2   18.05    0.76 
   4  -6   3   13.05    0.77 
   4  -6   4    2.84    0.79 
   4  -6   5    1.03    0.77 
   4  -6   6    2.21    0.76 
   4  -6   7    0.20    0.73 
   4  -6   8    7.93    0.87 
   4  -6   9    0.00    0.87 
   4  -6  10    2.50    1.06 
   4  -6  11    0.83    1.05 
   4  -6  12    1.54    1.42 
   4  -7 -12    0.00    1.81 
   4  -7 -11    0.00    1.41 
   4  -7 -10    4.84    1.55 
   4  -7  -9    0.04    0.86 
   4  -7  -8    8.77    0.92 
   4  -7  -7    1.94    0.79 
   4  -7  -6    5.67    1.03 
   4  -7  -5    0.69    0.73 
   4  -7  -4    2.03    0.67 
   4  -7  -3    0.00    0.63 
   4  -7  -2   30.00    1.02 
   4  -7  -1    7.20    0.68 
   4  -7   0    9.05    0.74 
   4  -7   1    0.66    0.46 
   4  -7   2    6.93    0.94 
   4  -7   3    1.84    0.70 
   4  -7   4   10.27    0.94 
   4  -7   5    2.27    0.89 
   4  -7   6    7.37    1.12 
   4  -7   7    1.25    0.84 
   4  -7   8    1.73    0.62 
   4  -7   9    0.00    0.87 
   4  -7  10    0.42    1.56 
   4  -7  11    1.67    1.16 
   4  -8 -11    0.00    1.51 
   4  -8 -10    4.01    1.62 
   4  -8  -9    0.00    0.98 
   4  -8  -8    4.51    0.80 
   4  -8  -7    0.00    0.87 
   4  -8  -6   17.41    1.40 
   4  -8  -5    1.31    0.84 
   4  -8  -4    3.99    0.87 
   4  -8  -3    0.00    0.71 
   4  -8  -2    2.61    0.71 
   4  -8  -1    0.43    0.47 
   4  -8   0    2.04    0.55 
   4  -8   1    1.12    0.50 
   4  -8   2    1.04    0.64 
   4  -8   3    4.31    0.90 
   4  -8   4    2.74    0.95 
   4  -8   5    2.87    1.00 
   4  -8   6    6.81    1.39 
   4  -8   7    0.38    0.84 
   4  -8   8    2.30    0.72 
   4  -8   9    0.25    0.92 
   4  -8  10    6.95    1.58 
   4  -9 -10    1.37    1.63 
   4  -9  -9    1.61    0.89 
   4  -9  -8    3.58    0.79 
   4  -9  -7    0.00    0.84 
   4  -9  -6    0.00    1.29 
   4  -9  -5    1.33    0.91 
   4  -9  -4    0.00    0.82 
   4  -9  -3    0.43    0.88 
   4  -9  -2    3.42    0.83 
   4  -9  -1    1.61    0.75 
   4  -9   0    4.43    0.86 
   4  -9   1    1.56    0.72 
   4  -9   2    3.39    0.86 
   4  -9   3    1.98    0.97 
   4  -9   4    7.38    1.31 
   4  -9   5    2.42    1.19 
   4  -9   6    8.78    1.45 
   4  -9   7    1.41    0.98 
   4  -9   8    0.21    0.58 
   4  -9   9    1.72    1.02 
   4 -10  -8    0.82    0.64 
   4 -10  -7    0.51    0.98 
   4 -10  -6    0.66    1.20 
   4 -10  -5    0.22    0.99 
   4 -10  -4    1.00    1.01 
   4 -10  -3    1.04    0.95 
   4 -10  -2    0.63    0.86 
   4 -10  -1    5.22    0.90 
   4 -10   0    2.89    0.82 
   4 -10   1    6.05    0.98 
   4 -10   2    0.50    0.86 
   4 -10   3    7.04    1.25 
   4 -10   4    1.79    1.12 
   4 -10   5    2.37    1.18 
   4 -10   6    1.13    1.47 
   4 -10   7    0.48    0.95 
   4 -11  -6    3.08    1.36 
   4 -11  -5    0.00    1.07 
   4 -11  -4    1.29    1.03 
   4 -11  -3    2.87    1.21 
   4 -11  -2    0.22    0.85 
   4 -11  -1    2.09    0.87 
   4 -11   0    1.63    0.80 
   4 -11   1    0.39    0.78 
   4 -11   2    0.15    0.88 
   4 -11   3    3.57    1.36 
   4 -11   4    1.08    1.15 
   4 -11   5    0.00    1.20 
   4 -11   6    0.88    0.90 
   4 -12  -3    0.00    1.32 
   4 -12  -2    1.58    0.98 
   4 -12  -1    0.52    0.85 
   4 -12   0    0.44    0.72 
   4 -12   1    1.41    0.98 
   4 -12   2    0.21    0.98 
   5   0 -14    3.21    1.36 
   5   0 -13    2.17    1.85 
   5   0 -12   11.18    2.15 
   5   0 -11    0.00    1.34 
   5   0 -10    2.24    0.99 
   5   0  -9    0.00    0.65 
   5   0  -8   45.95    1.20 
   5   0  -7    0.00    0.55 
   5   0  -6    9.92    0.69 
   5   0  -5    0.00    0.40 
   5   0  -4   15.88    0.54 
   5   0  -3    0.18    0.20 
   5   0  -2   45.97    0.67 
   5   0  -1    0.86    0.12 
   5   0   0   22.85    0.46 
   5   0   1    0.32    0.14 
   5   0   2    1.33    0.33 
   5   0   3    0.75    0.34 
   5   0   4   63.14    1.86 
   5   0   5    1.00    0.65 
   5   0   6   50.74    1.15 
   5   0   7    0.19    0.67 
   5   0   8    2.81    0.57 
   5   0   9    0.40    1.03 
   5   0  10    2.93    1.78 
   5   0  11    0.00    1.57 
   5   0  12    0.02    1.89 
   5   0  13    1.08    2.25 
   5  -1 -14    1.86    1.36 
   5  -1 -13    0.50    1.22 
   5  -1 -12    2.11    1.14 
   5  -1 -11    0.00    0.82 
   5  -1 -10    4.94    1.07 
   5  -1  -9    3.81    0.53 
   5  -1  -8    1.25    0.28 
   5  -1  -7    0.42    0.33 
   5  -1  -6    7.54    0.37 
   5  -1  -5    0.53    0.30 
   5  -1  -4   18.40    0.61 
   5  -1  -3   15.17    0.31 
   5  -1  -2   35.33    0.71 
   5  -1  -1   28.00    0.34 
   5  -1   0   34.09    0.51 
   5  -1   1   39.89    0.38 
   5  -1   2    2.40    0.22 
   5  -1   3    1.99    0.21 
   5  -1   4   13.90    0.51 
   5  -1   5    0.26    0.61 
   5  -1   6    3.97    0.48 
   5  -1   7    0.00    0.44 
   5  -1   8    1.33    0.43 
   5  -1   9    0.07    0.56 
   5  -1  10    5.86    1.06 
   5  -1  11    1.90    1.08 
   5  -1  12    4.89    1.49 
   5  -1  13    1.23    1.55 
   5  -2 -14    0.33    1.13 
   5  -2 -13    0.11    1.38 
   5  -2 -12    4.11    1.43 
   5  -2 -11    3.53    1.04 
   5  -2 -10    0.00    0.86 
   5  -2  -9    0.68    0.44 
   5  -2  -8   23.36    0.68 
   5  -2  -7   17.19    0.67 
   5  -2  -6    7.89    0.48 
   5  -2  -5    0.94    0.41 
   5  -2  -4   58.48    0.76 
   5  -2  -3    3.24    0.32 
   5  -2  -2    0.90    0.47 
   5  -2  -1    1.34    0.13 
   5  -2   0    2.99    0.18 
   5  -2   1   38.26    0.34 
   5  -2   2   61.90    0.72 
   5  -2   3   18.96    0.43 
   5  -2   4    4.18    0.41 
   5  -2   5    9.95    0.68 
   5  -2   6   32.83    0.92 
   5  -2   7    0.32    0.54 
   5  -2   8   10.89    0.69 
   5  -2   9    1.17    0.60 
   5  -2  10    1.64    1.01 
   5  -2  11    1.69    1.25 
   5  -2  12    0.96    1.52 
   5  -2  13    3.91    1.74 
   5  -3 -14    1.83    1.31 
   5  -3 -13    1.97    1.46 
   5  -3 -12    0.00    1.09 
   5  -3 -11   11.70    1.25 
   5  -3 -10    8.22    1.27 
   5  -3  -9   15.78    1.20 
   5  -3  -8    9.22    0.57 
   5  -3  -7   27.33    1.06 
   5  -3  -6    0.22    0.44 
   5  -3  -5   15.13    0.64 
   5  -3  -4   14.31    0.64 
   5  -3  -3    0.00    0.37 
   5  -3  -2    1.90    0.59 
   5  -3  -1    5.66    0.29 
   5  -3   0    6.52    0.40 
   5  -3   1   20.91    0.42 
   5  -3   2    8.89    0.41 
   5  -3   3   31.35    0.68 
   5  -3   4    0.41    0.40 
   5  -3   5    9.44    0.92 
   5  -3   6    2.10    0.58 
   5  -3   7    8.94    0.78 
   5  -3   8    4.30    0.58 
   5  -3   9   15.75    1.06 
   5  -3  10    4.64    1.12 
   5  -3  11    2.61    1.32 
   5  -3  12    0.33    1.64 
   5  -3  13    0.00    2.04 
   5  -4 -13    0.47    1.45 
   5  -4 -12    1.37    1.15 
   5  -4 -11    0.00    1.18 
   5  -4 -10    2.06    1.07 
   5  -4  -9    2.72    0.81 
   5  -4  -8    2.18    0.43 
   5  -4  -7   13.67    0.78 
   5  -4  -6   24.13    0.83 
   5  -4  -5   21.45    0.89 
   5  -4  -4    1.52    0.48 
   5  -4  -3   21.42    0.65 
   5  -4  -2    0.92    0.48 
   5  -4  -1    8.41    0.45 
   5  -4   0    1.30    0.28 
   5  -4   1   98.45    0.90 
   5  -4   2   17.52    0.59 
   5  -4   3    5.08    0.65 
   5  -4   4   35.59    0.83 
   5  -4   5    3.12    0.61 
   5  -4   6    1.45    0.73 
   5  -4   7    1.13    0.64 
   5  -4   8    0.15    0.39 
   5  -4   9    1.31    1.00 
   5  -4  10    0.97    0.89 
   5  -4  11    5.09    1.38 
   5  -4  12    1.14    1.90 
   5  -5 -13    0.00    1.55 
   5  -5 -12    0.00    1.20 
   5  -5 -11    3.27    1.15 
   5  -5 -10    0.00    1.08 
   5  -5  -9    2.28    1.22 
   5  -5  -8    3.84    0.57 
   5  -5  -7    5.61    0.83 
   5  -5  -6    4.66    0.80 
   5  -5  -5    2.87    0.64 
   5  -5  -4    2.47    0.60 
   5  -5  -3    2.57    0.44 
   5  -5  -2    0.00    0.40 
   5  -5  -1    6.41    0.47 
   5  -5   0   13.07    0.58 
   5  -5   1    7.33    0.46 
   5  -5   2   16.67    0.67 
   5  -5   3    8.65    0.64 
   5  -5   4    0.51    0.62 
   5  -5   5   13.10    0.99 
   5  -5   6    0.53    0.78 
   5  -5   7    0.79    0.67 
   5  -5   8    0.25    0.40 
   5  -5   9    4.41    1.21 
   5  -5  10    2.63    1.02 
   5  -5  11    0.46    1.50 
   5  -5  12    0.00    1.87 
   5  -6 -12    0.00    1.28 
   5  -6 -11    1.05    1.04 
   5  -6 -10    6.23    1.29 
   5  -6  -9    1.27    0.82 
   5  -6  -8    7.62    0.82 
   5  -6  -7   12.53    0.97 
   5  -6  -6    0.32    0.58 
   5  -6  -5    2.38    0.81 
   5  -6  -4    2.53    0.79 
   5  -6  -3    0.00    0.67 
   5  -6  -2    0.90    0.70 
   5  -6  -1    0.93    0.41 
   5  -6   0    1.06    0.43 
   5  -6   1    5.65    0.54 
   5  -6   2    2.40    0.83 
   5  -6   3    1.66    0.65 
   5  -6   4   14.10    1.01 
   5  -6   5    3.60    0.88 
   5  -6   6    4.02    0.94 
   5  -6   7    0.00    0.81 
   5  -6   8    1.03    0.60 
   5  -6   9    1.11    0.97 
   5  -6  10    0.54    1.12 
   5  -6  11    0.00    1.22 
   5  -7 -12    2.36    1.45 
   5  -7 -11    0.00    1.34 
   5  -7 -10    1.01    1.36 
   5  -7  -9    0.00    1.00 
   5  -7  -8    3.65    0.76 
   5  -7  -7    2.77    0.94 
   5  -7  -6    3.40    0.95 
   5  -7  -5    0.00    0.74 
   5  -7  -4    5.99    0.79 
   5  -7  -3    0.00    0.63 
   5  -7  -2   24.11    0.94 
   5  -7  -1    6.01    0.67 
   5  -7   0   18.33    0.94 
   5  -7   1    0.59    0.49 
   5  -7   2    1.21    0.69 
   5  -7   3    0.79    0.67 
   5  -7   4    3.83    0.83 
   5  -7   5    1.31    0.78 
   5  -7   6    3.45    1.22 
   5  -7   7    0.78    0.83 
   5  -7   8    0.92    0.57 
   5  -7   9    2.83    0.94 
   5  -7  10    1.18    1.38 
   5  -7  11    1.45    1.39 
   5  -8 -11    0.66    1.36 
   5  -8 -10    4.60    1.62 
   5  -8  -9    3.02    1.08 
   5  -8  -8    7.61    0.89 
   5  -8  -7    0.00    1.07 
   5  -8  -6    2.34    1.44 
   5  -8  -5    1.27    0.92 
   5  -8  -4    1.67    0.84 
   5  -8  -3    1.24    0.79 
   5  -8  -2    0.48    0.62 
   5  -8  -1    0.43    0.53 
   5  -8   0    0.94    0.51 
   5  -8   1    4.76    0.69 
   5  -8   2    5.25    0.76 
   5  -8   3    2.59    0.90 
   5  -8   4    8.73    1.35 
   5  -8   5    0.63    0.97 
   5  -8   6   15.00    1.40 
   5  -8   7    0.00    0.77 
   5  -8   8    3.02    0.74 
   5  -8   9    0.33    0.85 
   5  -8  10    2.44    1.55 
   5  -9 -10    0.63    0.82 
   5  -9  -9    0.96    0.93 
   5  -9  -8    1.14    0.71 
   5  -9  -7    0.68    0.96 
   5  -9  -6    3.06    1.37 
   5  -9  -5    6.00    1.20 
   5  -9  -4    5.68    1.03 
   5  -9  -3    0.00    0.85 
   5  -9  -2    2.90    0.82 
   5  -9  -1    1.67    0.72 
   5  -9   0    7.62    0.99 
   5  -9   1    1.28    0.67 
   5  -9   2    0.92    0.86 
   5  -9   3    1.06    1.12 
   5  -9   4    1.12    1.17 
   5  -9   5    4.08    1.20 
   5  -9   6    0.00    1.30 
   5  -9   7    4.62    1.01 
   5  -9   8    0.43    0.57 
   5  -9   9    1.06    0.96 
   5 -10  -8    2.57    0.81 
   5 -10  -7    0.00    0.93 
   5 -10  -6    0.69    1.30 
   5 -10  -5    3.58    1.13 
   5 -10  -4    0.00    1.02 
   5 -10  -3    3.24    1.11 
   5 -10  -2    0.79    0.83 
   5 -10  -1    7.47    1.01 
   5 -10   0    0.23    0.61 
   5 -10   1    3.46    0.96 
   5 -10   2    2.71    0.96 
   5 -10   3    1.05    1.12 
   5 -10   4    0.00    1.29 
   5 -10   5    0.05    1.20 
   5 -10   6    0.00    1.42 
   5 -10   7    0.00    0.99 
   5 -11  -6    0.00    1.39 
   5 -11  -5    0.00    1.11 
   5 -11  -4    0.63    1.06 
   5 -11  -3    0.59    1.31 
   5 -11  -2    0.62    0.85 
   5 -11  -1    1.72    0.77 
   5 -11   0    1.28    0.80 
   5 -11   1    1.87    0.86 
   5 -11   2    0.15    0.94 
   5 -11   3    0.55    1.35 
   5 -11   4    0.15    1.27 
   5 -11   5    0.64    1.39 
   5 -12  -2    0.45    1.00 
   5 -12  -1    2.48    1.11 
   5 -12   0    0.41    0.71 
   5 -12   1    1.41    1.13 
   5 -12   2    1.77    1.70 
   6   0 -14   10.77    1.77 
   6   0 -13    0.00    1.78 
   6   0 -12    0.00    1.89 
   6   0 -11    0.30    1.23 
   6   0 -10   18.96    1.15 
   6   0  -9    1.60    0.71 
   6   0  -8   23.30    1.01 
   6   0  -7    0.09    0.50 
   6   0  -6    3.46    0.70 
   6   0  -5    0.96    0.82 
   6   0  -4  131.08    1.45 
   6   0  -3    0.30    0.28 
   6   0  -2    0.00    0.35 
   6   0  -1    0.62    0.13 
   6   0   0  225.70    1.90 
   6   0   1    1.44    0.26 
   6   0   2   11.03    1.15 
   6   0   3    0.58    0.39 
   6   0   4    5.02    0.69 
   6   0   5    0.00    0.63 
   6   0   6    3.16    0.73 
   6   0   7    0.00    0.63 
   6   0   8    7.05    1.09 
   6   0   9    2.66    1.09 
   6   0  10    5.38    1.88 
   6   0  11    0.71    1.63 
   6   0  12    0.00    2.13 
   6   0  13    0.25    2.38 
   6  -1 -14    0.58    1.11 
   6  -1 -13    2.69    1.27 
   6  -1 -12    2.37    1.13 
   6  -1 -11    0.66    0.99 
   6  -1 -10    1.93    0.71 
   6  -1  -9    0.73    0.53 
   6  -1  -8   40.19    0.78 
   6  -1  -7    1.93    0.40 
   6  -1  -6    1.01    0.35 
   6  -1  -5   11.54    0.42 
   6  -1  -4   33.19    0.54 
   6  -1  -3    3.86    0.22 
   6  -1  -2    0.00    0.22 
   6  -1  -1    8.72    0.26 
   6  -1   0  239.99    1.30 
   6  -1   1   72.71    0.49 
   6  -1   2   14.70    0.49 
   6  -1   3    2.64    0.30 
   6  -1   4    1.34    0.73 
   6  -1   5    4.34    0.53 
   6  -1   6   45.30    1.03 
   6  -1   7    0.61    0.47 
   6  -1   8    3.12    0.56 
   6  -1   9    0.14    0.79 
   6  -1  10    5.29    1.13 
   6  -1  11    0.00    1.10 
   6  -1  12    0.00    1.42 
   6  -1  13    4.41    1.62 
   6  -2 -14    0.00    1.34 
   6  -2 -13    2.22    1.33 
   6  -2 -12    0.42    1.12 
   6  -2 -11    0.08    1.03 
   6  -2 -10    6.97    1.00 
   6  -2  -9    3.48    0.61 
   6  -2  -8    2.64    0.35 
   6  -2  -7    9.47    0.68 
   6  -2  -6    1.60    0.29 
   6  -2  -5   28.06    0.69 
   6  -2  -4    1.76    0.36 
   6  -2  -3   11.64    0.37 
   6  -2  -2   29.42    0.68 
   6  -2  -1   49.97    0.53 
   6  -2   0    3.58    0.27 
   6  -2   1    4.47    0.24 
   6  -2   2   13.20    0.54 
   6  -2   3    0.31    0.21 
   6  -2   4   39.22    0.80 
   6  -2   5    0.55    0.50 
   6  -2   6    4.95    0.58 
   6  -2   7    6.77    0.79 
   6  -2   8   10.01    0.71 
   6  -2   9   16.62    1.03 
   6  -2  10    1.11    1.33 
   6  -2  11    0.93    1.14 
   6  -2  12    0.00    1.42 
   6  -2  13    1.35    1.78 
   6  -3 -14    2.91    1.50 
   6  -3 -13    4.49    1.37 
   6  -3 -12    2.26    1.14 
   6  -3 -11    5.48    1.18 
   6  -3 -10    1.05    0.97 
   6  -3  -9    7.49    0.79 
   6  -3  -8   19.93    0.77 
   6  -3  -7    3.02    0.60 
   6  -3  -6    0.55    0.45 
   6  -3  -5    2.28    0.49 
   6  -3  -4   14.76    0.56 
   6  -3  -3   22.51    0.59 
   6  -3  -2    3.33    0.37 
   6  -3  -1   17.45    0.37 
   6  -3   0   13.31    0.41 
   6  -3   1   32.06    0.45 
   6  -3   2    9.56    0.44 
   6  -3   3    5.06    0.45 
   6  -3   4    1.85    0.51 
   6  -3   5   10.05    0.95 
   6  -3   6    5.31    0.72 
   6  -3   7    1.49    0.56 
   6  -3   8    3.94    0.59 
   6  -3   9    0.00    0.83 
   6  -3  10    1.29    1.27 
   6  -3  11    3.54    1.26 
   6  -3  12    0.00    1.46 
   6  -4 -13    2.98    1.37 
   6  -4 -12    1.59    1.29 
   6  -4 -11    1.32    1.02 
   6  -4 -10    1.10    1.07 
   6  -4  -9    5.29    1.21 
   6  -4  -8    4.59    0.55 
   6  -4  -7   10.07    0.80 
   6  -4  -6    0.67    0.55 
   6  -4  -5   23.36    0.76 
   6  -4  -4    6.07    0.52 
   6  -4  -3   25.96    0.68 
   6  -4  -2   10.79    0.55 
   6  -4  -1   12.01    0.42 
   6  -4   0    2.93    0.31 
   6  -4   1    4.95    0.33 
   6  -4   2    2.80    0.42 
   6  -4   3    2.12    0.39 
   6  -4   4    1.85    0.47 
   6  -4   5    3.57    0.86 
   6  -4   6    1.03    0.61 
   6  -4   7    4.61    0.89 
   6  -4   8    0.99    0.57 
   6  -4   9   15.89    1.20 
   6  -4  10    0.58    0.99 
   6  -4  11    3.81    1.36 
   6  -4  12    0.00    1.59 
   6  -5 -13   10.56    1.58 
   6  -5 -12    2.06    1.12 
   6  -5 -11    1.95    1.09 
   6  -5 -10    6.00    1.20 
   6  -5  -9    0.00    0.74 
   6  -5  -8    1.34    0.53 
   6  -5  -7    5.26    0.64 
   6  -5  -6    1.52    0.64 
   6  -5  -5    0.00    0.59 
   6  -5  -4    5.19    0.76 
   6  -5  -3    2.99    0.53 
   6  -5  -2    4.91    0.59 
   6  -5  -1    8.42    0.55 
   6  -5   0    2.82    0.36 
   6  -5   1   54.72    0.83 
   6  -5   2    4.40    0.49 
   6  -5   3   12.42    0.79 
   6  -5   4    2.57    0.72 
   6  -5   5   10.43    1.00 
   6  -5   6    1.87    0.84 
   6  -5   7    1.49    0.69 
   6  -5   8    1.20    0.58 
   6  -5   9    0.00    0.93 
   6  -5  10    2.37    1.06 
   6  -5  11    0.55    1.51 
   6  -5  12    0.00    1.78 
   6  -6 -12    1.70    1.23 
   6  -6 -11    0.49    1.09 
   6  -6 -10    0.00    1.22 
   6  -6  -9    2.75    0.92 
   6  -6  -8    0.25    0.50 
   6  -6  -7    7.57    0.93 
   6  -6  -6    0.01    0.61 
   6  -6  -5    7.65    0.77 
   6  -6  -4    7.63    0.77 
   6  -6  -3    3.50    0.65 
   6  -6  -2   27.71    0.81 
   6  -6  -1    1.56    0.51 
   6  -6   0   29.52    0.95 
   6  -6   1   15.32    0.75 
   6  -6   2    5.21    0.79 
   6  -6   3    3.10    0.63 
   6  -6   4    5.49    0.78 
   6  -6   5    0.00    0.78 
   6  -6   6    1.73    0.90 
   6  -6   7    0.51    1.19 
   6  -6   8    0.46    0.60 
   6  -6   9    8.66    1.08 
   6  -6  10    1.52    1.18 
   6  -6  11    2.06    1.47 
   6  -7 -11    0.18    1.14 
   6  -7 -10    0.16    1.37 
   6  -7  -9    1.90    0.87 
   6  -7  -8    9.21    0.90 
   6  -7  -7    0.00    0.80 
   6  -7  -6    6.75    1.14 
   6  -7  -5    4.99    0.84 
   6  -7  -4    6.46    0.91 
   6  -7  -3    1.23    0.62 
   6  -7  -2    6.90    0.67 
   6  -7  -1    0.23    0.43 
   6  -7   0    2.76    0.58 
   6  -7   1    0.76    0.45 
   6  -7   2    9.66    0.87 
   6  -7   3    0.79    0.72 
   6  -7   4    5.29    1.00 
   6  -7   5    1.93    0.95 
   6  -7   6    3.56    1.32 
   6  -7   7    2.35    0.94 
   6  -7   8    6.14    0.96 
   6  -7   9    0.35    0.98 
   6  -7  10    4.46    1.41 
   6  -8 -11    1.70    1.56 
   6  -8 -10    1.74    1.66 
   6  -8  -9    0.00    0.99 
   6  -8  -8    0.85    0.59 
   6  -8  -7    3.21    0.97 
   6  -8  -6    0.71    1.50 
   6  -8  -5    0.00    0.97 
   6  -8  -4    0.43    0.88 
   6  -8  -3    0.00    0.78 
   6  -8  -2    4.48    0.74 
   6  -8  -1    1.79    0.55 
   6  -8   0    8.20    0.80 
   6  -8   1    1.04    0.54 
   6  -8   2    2.57    0.79 
   6  -8   3    1.99    1.03 
   6  -8   4    6.53    1.11 
   6  -8   5    0.16    1.12 
   6  -8   6    6.36    1.40 
   6  -8   7    1.86    0.86 
   6  -8   8    1.98    0.69 
   6  -8   9    2.47    0.95 
   6  -9  -9    0.85    1.00 
   6  -9  -8    5.22    0.90 
   6  -9  -7    1.32    1.08 
   6  -9  -6    0.00    1.48 
   6  -9  -5    0.00    1.25 
   6  -9  -4    4.10    1.35 
   6  -9  -3    1.40    1.09 
   6  -9  -2    2.70    0.87 
   6  -9  -1    0.68    0.68 
   6  -9   0    0.31    0.52 
   6  -9   1    0.66    0.83 
   6  -9   2    1.28    1.02 
   6  -9   3    4.35    1.27 
   6  -9   4    0.60    1.26 
   6  -9   5    1.38    1.04 
   6  -9   6    1.29    1.30 
   6  -9   7    0.91    0.87 
   6  -9   8    0.68    0.65 
   6 -10  -8    1.00    0.83 
   6 -10  -7    1.01    1.08 
   6 -10  -6    0.00    1.39 
   6 -10  -5    0.49    1.16 
   6 -10  -4    0.35    1.04 
   6 -10  -3    0.46    1.01 
   6 -10  -2    2.86    0.93 
   6 -10  -1    1.07    0.74 
   6 -10   0    3.91    0.89 
   6 -10   1    0.56    0.79 
   6 -10   2    2.37    0.94 
   6 -10   3    0.00    1.55 
   6 -10   4    1.36    1.42 
   6 -10   5    6.70    1.34 
   6 -10   6    2.82    1.37 
   6 -10   7    1.20    0.99 
   6 -11  -6    0.00    1.69 
   6 -11  -5    0.96    1.13 
   6 -11  -4    0.00    1.08 
   6 -11  -3    3.73    1.31 
   6 -11  -2    1.33    0.89 
   6 -11  -1    3.43    1.15 
   6 -11   0    0.65    0.70 
   6 -11   1    2.47    1.18 
   6 -11   2    0.00    0.89 
   6 -11   3    0.28    1.40 
   6 -11   4    0.00    1.30 
   6 -11   5    0.00    1.56 
   6 -12  -1    0.30    0.58 
   6 -12   0    0.11    0.65 
   7   0 -14    9.71    1.52 
   7   0 -13    2.73    1.98 
   7   0 -12    3.66    2.93 
   7   0 -11    0.00    1.34 
   7   0 -10    1.38    0.83 
   7   0  -9    0.00    0.63 
   7   0  -8   11.47    0.70 
   7   0  -7    0.00    0.61 
   7   0  -6    1.66    0.42 
   7   0  -5    1.04    0.72 
   7   0  -4  145.70    1.84 
   7   0  -3    0.13    0.30 
   7   0  -2  180.11    1.25 
   7   0  -1    1.90    0.31 
   7   0   0  474.11    3.21 
   7   0   1    1.74    0.29 
   7   0   2    6.04    0.57 
   7   0   3    0.93    0.46 
   7   0   4    0.00    1.70 
   7   0   5    0.60    0.89 
   7   0   6    0.15    0.76 
   7   0   7    0.00    0.96 
   7   0   8    0.00    0.94 
   7   0   9    0.81    1.06 
   7   0  10    7.42    2.42 
   7   0  11    0.00    1.58 
   7   0  12   11.21    2.29 
   7   0  13    0.89    2.06 
   7  -1 -14    2.31    1.19 
   7  -1 -13    1.41    1.24 
   7  -1 -12   13.22    1.44 
   7  -1 -11    0.43    0.91 
   7  -1 -10   45.49    1.58 
   7  -1  -9    4.79    0.60 
   7  -1  -8    8.49    0.54 
   7  -1  -7    1.71    0.43 
   7  -1  -6   14.67    0.58 
   7  -1  -5   28.65    0.60 
   7  -1  -4    5.04    0.49 
   7  -1  -3   12.94    0.32 
   7  -1  -2   34.70    0.51 
   7  -1  -1    0.66    0.16 
   7  -1   0  140.51    0.89 
   7  -1   1    3.85    0.21 
   7  -1   2    6.58    0.94 
   7  -1   3   13.19    0.41 
   7  -1   4   71.14    1.08 
   7  -1   5    0.00    0.63 
   7  -1   6   35.29    0.92 
   7  -1   7    2.09    0.82 
   7  -1   8   33.35    1.40 
   7  -1   9    4.36    0.88 
   7  -1  10    1.96    1.29 
   7  -1  11    0.00    1.12 
   7  -1  12    1.33    1.44 
   7  -1  13    0.88    0.72 
   7  -2 -14    2.84    1.13 
   7  -2 -13    6.06    1.35 
   7  -2 -12    2.28    1.01 
   7  -2 -11    5.45    1.05 
   7  -2 -10    3.97    1.04 
   7  -2  -9    4.01    0.62 
   7  -2  -8   21.29    0.69 
   7  -2  -7    1.64    0.48 
   7  -2  -6    5.73    0.48 
   7  -2  -5   12.17    0.60 
   7  -2  -4   11.91    0.43 
   7  -2  -3    0.48    0.19 
   7  -2  -2   37.02    0.50 
   7  -2  -1    1.22    0.20 
   7  -2   0   96.26    0.79 
   7  -2   1   26.65    0.42 
   7  -2   2   12.27    0.33 
   7  -2   3   50.14    0.59 
   7  -2   4    0.77    0.40 
   7  -2   5   17.97    0.98 
   7  -2   6    0.71    0.47 
   7  -2   7    3.48    0.72 
   7  -2   8    0.63    0.45 
   7  -2   9    2.74    0.81 
   7  -2  10   10.04    1.42 
   7  -2  11    1.62    1.20 
   7  -2  12    0.03    1.48 
   7  -3 -14    0.12    0.75 
   7  -3 -13    2.05    1.20 
   7  -3 -12    0.00    1.05 
   7  -3 -11    0.78    1.04 
   7  -3 -10   13.79    1.25 
   7  -3  -9    5.21    0.65 
   7  -3  -8    2.11    0.42 
   7  -3  -7   28.01    1.20 
   7  -3  -6    0.32    0.34 
   7  -3  -5   39.16    0.87 
   7  -3  -4    6.21    0.42 
   7  -3  -3   18.54    0.50 
   7  -3  -2    9.16    0.39 
   7  -3  -1   42.86    0.44 
   7  -3   0   68.77    0.75 
   7  -3   1    1.03    0.17 
   7  -3   2    3.98    0.45 
   7  -3   3    5.85    0.39 
   7  -3   4    1.55    0.51 
   7  -3   5    2.95    0.54 
   7  -3   6    6.22    0.58 
   7  -3   7    8.69    1.23 
   7  -3   8    5.80    0.81 
   7  -3   9   10.91    1.09 
   7  -3  10    0.21    1.14 
   7  -3  11    0.15    1.22 
   7  -3  12    2.82    1.45 
   7  -4 -13    8.58    1.42 
   7  -4 -12    0.76    1.10 
   7  -4 -11    6.99    1.22 
   7  -4 -10    1.57    0.85 
   7  -4  -9   15.16    1.11 
   7  -4  -8    0.46    0.40 
   7  -4  -7    1.81    0.69 
   7  -4  -6   14.55    0.83 
   7  -4  -5    3.00    0.57 
   7  -4  -4    1.01    0.59 
   7  -4  -3    1.16    0.35 
   7  -4  -2    4.48    0.38 
   7  -4  -1    4.76    0.33 
   7  -4   0   35.84    0.72 
   7  -4   1   43.89    0.62 
   7  -4   2    5.63    0.45 
   7  -4   3   13.14    0.69 
   7  -4   4    3.02    0.55 
   7  -4   5   16.46    1.23 
   7  -4   6    1.91    0.61 
   7  -4   7    7.98    0.93 
   7  -4   8    2.67    0.78 
   7  -4   9    2.62    0.83 
   7  -4  10    0.05    1.16 
   7  -4  11    3.24    1.30 
   7  -4  12    2.56    1.60 
   7  -5 -13    0.90    1.29 
   7  -5 -12    1.36    1.24 
   7  -5 -11    2.60    1.11 
   7  -5 -10    2.70    1.26 
   7  -5  -9    1.06    0.86 
   7  -5  -8    4.21    0.63 
   7  -5  -7    4.53    0.73 
   7  -5  -6    1.52    0.69 
   7  -5  -5   22.35    0.97 
   7  -5  -4    2.58    0.59 
   7  -5  -3   17.45    0.75 
   7  -5  -2    0.91    0.42 
   7  -5  -1   25.91    0.65 
   7  -5   0    1.09    0.31 
   7  -5   1   12.22    0.54 
   7  -5   2    8.68    0.53 
   7  -5   3   36.38    0.89 
   7  -5   4   10.33    0.75 
   7  -5   5    0.25    0.75 
   7  -5   6    4.83    0.77 
   7  -5   7    6.22    1.13 
   7  -5   8    0.61    0.52 
   7  -5   9    7.74    1.03 
   7  -5  10    0.23    1.04 
   7  -5  11    0.00    1.39 
   7  -6 -12    0.00    1.23 
   7  -6 -11    4.18    1.17 
   7  -6 -10    0.40    1.40 
   7  -6  -9    1.57    0.89 
   7  -6  -8    0.39    0.50 
   7  -6  -7    3.08    0.75 
   7  -6  -6    7.38    0.99 
   7  -6  -5   14.33    0.88 
   7  -6  -4   16.22    0.98 
   7  -6  -3    0.05    0.52 
   7  -6  -2   17.43    0.78 
   7  -6  -1    0.10    0.39 
   7  -6   0    6.75    0.54 
   7  -6   1   10.53    0.71 
   7  -6   2    5.48    0.61 
   7  -6   3    8.32    0.83 
   7  -6   4    1.13    0.80 
   7  -6   5    6.52    1.07 
   7  -6   6    4.66    1.15 
   7  -6   7    0.00    1.01 
   7  -6   8    4.61    0.84 
   7  -6   9    0.06    0.87 
   7  -6  10    5.79    1.23 
   7  -6  11    2.31    1.62 
   7  -7 -11    0.00    1.25 
   7  -7 -10    0.96    1.48 
   7  -7  -9    0.00    0.87 
   7  -7  -8    6.36    0.83 
   7  -7  -7    0.00    0.80 
   7  -7  -6    4.27    1.19 
   7  -7  -5    1.18    0.79 
   7  -7  -4    3.46    0.81 
   7  -7  -3    0.00    0.68 
   7  -7  -2   12.08    0.84 
   7  -7  -1    6.06    0.63 
   7  -7   0    3.22    0.58 
   7  -7   1    0.51    0.46 
   7  -7   2    3.28    0.82 
   7  -7   3    6.64    0.98 
   7  -7   4   19.53    1.28 
   7  -7   5    0.00    0.96 
   7  -7   6    4.73    1.10 
   7  -7   7    4.09    1.16 
   7  -7   8    3.95    0.78 
   7  -7   9    0.00    1.14 
   7  -7  10    1.18    1.13 
   7  -8 -10    4.75    1.53 
   7  -8  -9    0.00    0.94 
   7  -8  -8    1.91    0.64 
   7  -8  -7    0.10    0.83 
   7  -8  -6    5.18    1.39 
   7  -8  -5    0.00    0.94 
   7  -8  -4   16.63    1.33 
   7  -8  -3    0.76    0.99 
   7  -8  -2    9.56    0.79 
   7  -8  -1    0.72    0.53 
   7  -8   0    1.47    0.52 
   7  -8   1    0.64    0.53 
   7  -8   2    0.33    0.78 
   7  -8   3    4.81    1.37 
   7  -8   4    0.00    1.25 
   7  -8   5    0.00    1.28 
   7  -8   6    0.96    1.41 
   7  -8   7    0.00    1.04 
   7  -8   8    2.19    0.70 
   7  -8   9    0.00    1.17 
   7  -9  -9    0.00    1.01 
   7  -9  -8    2.06    0.75 
   7  -9  -7    1.61    1.01 
   7  -9  -6    0.27    1.45 
   7  -9  -5    2.68    1.21 
   7  -9  -4    1.52    1.23 
   7  -9  -3    0.28    1.28 
   7  -9  -2    2.56    1.03 
   7  -9  -1    0.59    0.82 
   7  -9   0    5.43    1.27 
   7  -9   1    0.78    0.83 
   7  -9   2    0.00    1.09 
   7  -9   3    2.18    1.53 
   7  -9   4    5.66    1.30 
   7  -9   5    0.65    1.10 
   7  -9   6    6.57    1.74 
   7  -9   7    0.00    0.88 
   7  -9   8    0.28    0.75 
   7 -10  -8    0.74    0.73 
   7 -10  -7    0.24    0.94 
   7 -10  -6    0.15    1.54 
   7 -10  -5    1.69    1.29 
   7 -10  -4    4.96    1.40 
   7 -10  -3    4.13    1.56 
   7 -10  -2    0.67    0.94 
   7 -10  -1    4.72    1.03 
   7 -10   0    0.98    0.67 
   7 -10   1    2.44    1.00 
   7 -10   2    1.06    0.90 
   7 -10   3    0.00    1.31 
   7 -10   4    0.00    1.35 
   7 -10   5    0.55    1.16 
   7 -10   6    2.61    1.54 
   7 -11  -5    3.77    1.48 
   7 -11  -4    0.40    1.27 
   7 -11  -3    3.56    1.40 
   7 -11  -2    1.01    0.88 
   7 -11  -1    1.89    0.84 
   7 -11   0    0.60    0.65 
   7 -11   1    2.43    0.91 
   7 -11   2    1.83    1.03 
   7 -11   3    1.82    1.34 
   7 -11   4    1.52    1.59 
   8   0 -14    0.95    2.85 
   8   0 -13    0.89    2.79 
   8   0 -12   15.32    2.94 
   8   0 -11    0.55    1.73 
   8   0 -10   47.33    1.54 
   8   0  -9    3.53    0.78 
   8   0  -8   15.20    0.85 
   8   0  -7    0.00    0.66 
   8   0  -6    8.01    0.79 
   8   0  -5    1.25    0.64 
   8   0  -4    3.87    0.69 
   8   0  -3    0.65    0.33 
   8   0  -2    5.78    0.53 
   8   0  -1    0.42    0.30 
   8   0   0   83.69    1.27 
   8   0   1    0.51    0.27 
   8   0   2   17.70    1.19 
   8   0   3    0.88    0.43 
   8   0   4   87.10    2.40 
   8   0   5    0.44    0.86 
   8   0   6   25.05    1.63 
   8   0   7    0.06    0.97 
   8   0   8   13.74    1.87 
   8   0   9    0.78    1.13 
   8   0  10    0.12    1.82 
   8   0  11    0.00    1.62 
   8   0  12    9.03    2.44 
   8  -1 -14   13.30    1.58 
   8  -1 -13    1.41    1.73 
   8  -1 -12    2.38    1.28 
   8  -1 -11    1.73    1.02 
   8  -1 -10    0.72    0.60 
   8  -1  -9    4.41    0.60 
   8  -1  -8    3.82    0.51 
   8  -1  -7    1.40    0.42 
   8  -1  -6    5.03    0.47 
   8  -1  -5    2.79    0.47 
   8  -1  -4   38.14    0.67 
   8  -1  -3    3.43    0.24 
   8  -1  -2  223.46    0.98 
   8  -1  -1   19.45    0.37 
   8  -1   0   55.39    0.65 
   8  -1   1   20.00    0.40 
   8  -1   2    9.27    0.50 
   8  -1   3    0.81    0.31 
   8  -1   4   18.61    0.80 
   8  -1   5    0.57    0.68 
   8  -1   6   11.35    0.90 
   8  -1   7    0.00    0.71 
   8  -1   8    8.34    1.14 
   8  -1   9    0.58    0.76 
   8  -1  10   10.59    1.39 
   8  -1  11    0.01    1.11 
   8  -1  12    3.73    1.56 
   8  -2 -14    0.00    1.61 
   8  -2 -13    4.92    1.21 
   8  -2 -12    8.49    1.73 
   8  -2 -11    2.05    1.19 
   8  -2 -10   26.08    1.45 
   8  -2  -9    3.57    0.60 
   8  -2  -8    8.70    0.59 
   8  -2  -7    4.87    0.51 
   8  -2  -6   48.71    0.95 
   8  -2  -5    2.62    0.44 
   8  -2  -4   22.39    0.72 
   8  -2  -3    6.16    0.35 
   8  -2  -2    1.06    0.28 
   8  -2  -1   27.13    0.51 
   8  -2   0   21.66    0.39 
   8  -2   1   23.02    0.46 
   8  -2   2    4.93    0.60 
   8  -2   3   33.86    0.57 
   8  -2   4   91.60    1.20 
   8  -2   5    1.75    0.62 
   8  -2   6   14.49    0.81 
   8  -2   7    2.11    0.74 
   8  -2   8   16.48    1.01 
   8  -2   9    2.10    0.93 
   8  -2  10    0.55    0.88 
   8  -2  11    1.55    1.21 
   8  -2  12    0.00    1.62 
   8  -3 -13   10.22    1.35 
   8  -3 -12    1.40    1.29 
   8  -3 -11   12.82    1.32 
   8  -3 -10    0.02    0.69 
   8  -3  -9   17.06    0.93 
   8  -3  -8    1.64    0.43 
   8  -3  -7   10.47    0.76 
   8  -3  -6    0.07    0.43 
   8  -3  -5   37.07    0.91 
   8  -3  -4   13.70    0.54 
   8  -3  -3    4.00    0.34 
   8  -3  -2   19.48    0.43 
   8  -3  -1    0.95    0.21 
   8  -3   0    9.74    0.33 
   8  -3   1   19.34    0.40 
   8  -3   2    0.84    0.33 
   8  -3   3   15.73    0.47 
   8  -3   4    6.21    0.67 
   8  -3   5    8.86    0.79 
   8  -3   6    9.71    0.81 
   8  -3   7   20.12    1.24 
   8  -3   8    2.66    0.71 
   8  -3   9   11.65    1.06 
   8  -3  10    1.67    1.10 
   8  -3  11    3.54    1.31 
   8  -3  12    0.00    1.55 
   8  -4 -13    8.10    1.44 
   8  -4 -12    0.00    1.17 
   8  -4 -11    1.97    1.30 
   8  -4 -10    2.22    1.00 
   8  -4  -9    0.00    0.74 
   8  -4  -8    6.24    0.62 
   8  -4  -7    2.84    0.68 
   8  -4  -6    0.88    0.54 
   8  -4  -5   26.69    0.83 
   8  -4  -4    0.90    0.46 
   8  -4  -3   29.96    0.70 
   8  -4  -2    4.99    0.40 
   8  -4  -1   55.12    0.63 
   8  -4   0    0.58    0.21 
   8  -4   1   33.53    0.55 
   8  -4   2   26.32    0.65 
   8  -4   3   31.86    0.77 
   8  -4   4    1.62    0.56 
   8  -4   5    0.89    0.59 
   8  -4   6    1.87    0.66 
   8  -4   7    0.01    0.91 
   8  -4   8    1.62    0.71 
   8  -4   9    3.43    1.00 
   8  -4  10    0.00    1.17 
   8  -4  11    3.74    1.33 
   8  -5 -13    3.97    1.41 
   8  -5 -12    0.00    1.23 
   8  -5 -11    5.43    1.20 
   8  -5 -10    1.37    0.92 
   8  -5  -9    6.30    1.01 
   8  -5  -8    0.03    0.46 
   8  -5  -7    3.32    0.73 
   8  -5  -6    8.02    0.90 
   8  -5  -5   19.05    1.02 
   8  -5  -4    5.74    0.71 
   8  -5  -3   14.31    0.77 
   8  -5  -2    0.00    0.47 
   8  -5  -1    2.42    0.36 
   8  -5   0    0.15    0.25 
   8  -5   1   19.50    0.57 
   8  -5   2   14.92    0.66 
   8  -5   3    5.75    0.59 
   8  -5   4    0.84    0.65 
   8  -5   5   12.59    1.09 
   8  -5   6    1.90    0.68 
   8  -5   7    9.13    1.09 
   8  -5   8    0.85    0.64 
   8  -5   9    1.92    0.88 
   8  -5  10    0.00    1.19 
   8  -5  11    2.75    1.35 
   8  -6 -12    2.24    1.31 
   8  -6 -11    0.57    1.16 
   8  -6 -10    0.88    0.80 
   8  -6  -9    3.28    0.91 
   8  -6  -8    8.17    0.86 
   8  -6  -7    5.18    0.84 
   8  -6  -6    1.10    0.94 
   8  -6  -5    6.29    0.81 
   8  -6  -4    0.82    0.76 
   8  -6  -3    7.63    0.80 
   8  -6  -2    0.29    0.57 
   8  -6  -1   27.40    0.89 
   8  -6   0    0.65    0.42 
   8  -6   1    0.28    0.48 
   8  -6   2    3.59    0.59 
   8  -6   3   16.15    0.83 
   8  -6   4    8.04    1.13 
   8  -6   5    0.62    0.77 
   8  -6   6    2.07    0.85 
   8  -6   7    0.00    1.08 
   8  -6   8    0.92    0.65 
   8  -6   9    2.17    0.89 
   8  -6  10    0.00    1.23 
   8  -7 -11    2.93    1.24 
   8  -7 -10    0.00    1.43 
   8  -7  -9    1.28    0.89 
   8  -7  -8    0.61    0.56 
   8  -7  -7    1.42    0.83 
   8  -7  -6    6.46    1.20 
   8  -7  -5    5.06    0.97 
   8  -7  -4   11.44    1.04 
   8  -7  -3    6.54    0.99 
   8  -7  -2   17.17    0.82 
   8  -7  -1    0.78    0.45 
   8  -7   0    1.46    0.49 
   8  -7   1    2.80    0.58 
   8  -7   2    0.30    0.67 
   8  -7   3    1.72    0.93 
   8  -7   4    0.68    0.98 
   8  -7   5    2.78    1.09 
   8  -7   6    1.36    0.88 
   8  -7   7    3.39    1.18 
   8  -7   8    1.68    0.73 
   8  -7   9    0.80    1.04 
   8  -7  10    0.51    1.22 
   8  -8 -10    0.00    1.55 
   8  -8  -9    0.97    0.93 
   8  -8  -8    6.04    0.87 
   8  -8  -7    0.86    0.79 
   8  -8  -6    0.00    1.34 
   8  -8  -5    1.61    1.04 
   8  -8  -4    1.19    1.07 
   8  -8  -3    0.00    1.15 
   8  -8  -2    0.48    0.75 
   8  -8  -1    3.96    0.97 
   8  -8   0    0.08    0.54 
   8  -8   1    0.00    0.93 
   8  -8   2    4.65    0.89 
   8  -8   3    3.41    1.26 
   8  -8   4   13.46    1.52 
   8  -8   5    2.51    1.43 
   8  -8   6    6.99    1.31 
   8  -8   7    0.26    1.11 
   8  -8   8    1.93    0.59 
   8  -8   9    0.87    1.20 
   8  -9  -9    0.00    1.06 
   8  -9  -8    0.44    0.60 
   8  -9  -7    0.02    0.98 
   8  -9  -6    3.01    1.28 
   8  -9  -5    0.00    1.01 
   8  -9  -4    8.67    1.30 
   8  -9  -3    0.00    1.32 
   8  -9  -2    3.49    1.02 
   8  -9  -1    0.76    0.94 
   8  -9   0    2.30    0.92 
   8  -9   1    0.00    1.05 
   8  -9   2    2.52    1.13 
   8  -9   3    0.90    1.54 
   8  -9   4    1.86    1.30 
   8  -9   5    1.03    1.36 
   8  -9   6    0.00    1.58 
   8  -9   7    0.83    0.97 
   8 -10  -7    1.60    1.05 
   8 -10  -6    3.22    1.51 
   8 -10  -5    1.72    1.35 
   8 -10  -4    0.00    1.38 
   8 -10  -3    2.04    1.39 
   8 -10  -2    0.00    0.94 
   8 -10  -1    1.06    0.85 
   8 -10   0    0.26    0.63 
   8 -10   1    1.67    1.31 
   8 -10   2    0.10    1.08 
   8 -10   3    0.00    1.58 
   8 -10   4    0.00    1.52 
   8 -10   5    1.37    1.28 
   8 -10   6    0.64    0.77 
   8 -11  -5    3.79    1.57 
   8 -11  -4    0.16    1.36 
   8 -11  -3    0.00    1.38 
   8 -11  -2    0.00    0.97 
   8 -11  -1    0.55    0.80 
   8 -11   0    0.82    0.77 
   8 -11   1    0.98    0.87 
   8 -11   2    0.00    1.15 
   8 -11   3    0.00    1.61 
   9   0 -14   10.56    3.76 
   9   0 -13    0.00    2.39 
   9   0 -12    3.94    1.87 
   9   0 -11    0.77    1.46 
   9   0 -10    5.15    1.61 
   9   0  -9    0.74    0.93 
   9   0  -8    1.00    0.60 
   9   0  -7    0.24    0.68 
   9   0  -6    0.63    0.60 
   9   0  -5    0.97    0.76 
   9   0  -4   85.92    1.48 
   9   0  -3    0.87    0.35 
   9   0  -2   91.24    1.15 
   9   0  -1    1.22    0.31 
   9   0   0   12.10    0.59 
   9   0   1    0.05    0.27 
   9   0   2   31.49    1.56 
   9   0   3    0.29    0.45 
   9   0   4   16.25    1.15 
   9   0   5    0.26    1.42 
   9   0   6   27.94    1.60 
   9   0   7    0.00    1.17 
   9   0   8    2.08    1.25 
   9   0   9    0.00    1.18 
   9   0  10    0.00    1.85 
   9   0  11    2.93    1.79 
   9   0  12    3.36    2.26 
   9  -1 -14    1.42    1.58 
   9  -1 -13    3.82    1.56 
   9  -1 -12    2.66    1.52 
   9  -1 -11    0.00    1.09 
   9  -1 -10   19.37    1.05 
   9  -1  -9    1.20    0.56 
   9  -1  -8    0.28    0.37 
   9  -1  -7    0.00    0.43 
   9  -1  -6   38.07    0.85 
   9  -1  -5   13.83    0.57 
   9  -1  -4   19.76    0.84 
   9  -1  -3    2.60    0.28 
   9  -1  -2   27.17    0.46 
   9  -1  -1   23.68    0.46 
   9  -1   0   27.88    0.51 
   9  -1   1   32.59    0.54 
   9  -1   2    2.86    0.39 
   9  -1   3   13.76    0.53 
   9  -1   4   27.86    0.86 
   9  -1   5    0.80    0.68 
   9  -1   6    5.85    0.71 
   9  -1   7    0.41    0.68 
   9  -1   8   13.18    1.34 
   9  -1   9    0.00    0.85 
   9  -1  10    2.21    1.54 
   9  -1  11    0.00    1.14 
   9  -1  12   12.07    1.60 
   9  -2 -13    1.78    1.50 
   9  -2 -12    0.36    1.47 
   9  -2 -11    1.85    1.07 
   9  -2 -10    1.34    0.91 
   9  -2  -9    3.14    0.60 
   9  -2  -8    0.44    0.33 
   9  -2  -7   17.62    0.76 
   9  -2  -6   15.13    0.65 
   9  -2  -5   46.80    0.88 
   9  -2  -4    1.85    0.37 
   9  -2  -3   10.09    0.39 
   9  -2  -2   32.53    0.72 
   9  -2  -1    6.48    0.41 
   9  -2   0    0.67    0.16 
   9  -2   1    0.41    0.24 
   9  -2   2   14.28    0.69 
   9  -2   3    0.33    0.26 
   9  -2   4   53.15    0.95 
   9  -2   5   10.58    0.72 
   9  -2   6   19.28    0.78 
   9  -2   7   19.35    1.15 
   9  -2   8    2.57    0.75 
   9  -2   9    6.00    1.04 
   9  -2  10    1.58    1.42 
   9  -2  11    3.36    1.25 
   9  -2  12    0.33    1.48 
   9  -3 -13    3.47    1.25 
   9  -3 -12    0.00    1.40 
   9  -3 -11   10.24    1.50 
   9  -3 -10    9.60    1.16 
   9  -3  -9    4.73    0.92 
   9  -3  -8    1.37    0.41 
   9  -3  -7    1.68    0.54 
   9  -3  -6   17.68    0.80 
   9  -3  -5    6.28    0.50 
   9  -3  -4    9.22    0.50 
   9  -3  -3    8.89    0.39 
   9  -3  -2    4.87    0.29 
   9  -3  -1   35.10    0.54 
   9  -3   0    3.24    0.26 
   9  -3   1    7.60    0.43 
   9  -3   2    3.95    0.60 
   9  -3   3   35.61    0.60 
   9  -3   4    7.46    0.56 
   9  -3   5    5.12    0.73 
   9  -3   6    1.74    0.56 
   9  -3   7    0.00    0.71 
   9  -3   8    2.03    0.70 
   9  -3   9    2.95    0.91 
   9  -3  10    1.62    0.94 
   9  -3  11    0.00    1.28 
   9  -4 -13    2.05    1.40 
   9  -4 -12    1.50    1.38 
   9  -4 -11    3.53    1.11 
   9  -4 -10    2.24    0.72 
   9  -4  -9    9.75    0.88 
   9  -4  -8    0.30    0.36 
   9  -4  -7   16.25    0.94 
   9  -4  -6    0.18    0.54 
   9  -4  -5   49.76    1.25 
   9  -4  -4    4.98    0.54 
   9  -4  -3   19.41    0.71 
   9  -4  -2   17.55    0.62 
   9  -4  -1    0.18    0.19 
   9  -4   0    4.55    0.34 
   9  -4   1    0.85    0.22 
   9  -4   2    1.18    0.37 
   9  -4   3    2.35    0.46 
   9  -4   4   10.10    0.68 
   9  -4   5   14.25    1.08 
   9  -4   6    0.59    0.64 
   9  -4   7   21.25    1.32 
   9  -4   8    2.98    0.80 
   9  -4   9    5.37    0.97 
   9  -4  10    1.96    1.17 
   9  -4  11    5.97    1.46 
   9  -5 -12    1.44    1.22 
   9  -5 -11    7.36    1.31 
   9  -5 -10    0.44    0.79 
   9  -5  -9    2.26    1.05 
   9  -5  -8    2.45    0.55 
   9  -5  -7    2.16    0.73 
   9  -5  -6    2.65    0.85 
   9  -5  -5    8.02    0.76 
   9  -5  -4    2.76    0.77 
   9  -5  -3    7.89    0.64 
   9  -5  -2    0.60    0.59 
   9  -5  -1   29.71    0.62 
   9  -5   0    2.51    0.33 
   9  -5   1   31.22    0.69 
   9  -5   2    1.02    0.58 
   9  -5   3   41.70    1.08 
   9  -5   4    1.09    0.85 
   9  -5   5    1.56    0.82 
   9  -5   6    0.45    0.62 
   9  -5   7    1.23    0.73 
   9  -5   8    1.26    0.71 
   9  -5   9    0.46    0.90 
   9  -5  10    0.00    1.18 
   9  -5  11    0.52    0.67 
   9  -6 -12    2.34    1.44 
   9  -6 -11    0.00    1.07 
   9  -6 -10    4.66    1.15 
   9  -6  -9    1.97    0.95 
   9  -6  -8    0.20    0.51 
   9  -6  -7   12.89    1.10 
   9  -6  -6    1.67    0.90 
   9  -6  -5   23.21    1.11 
   9  -6  -4    5.30    0.82 
   9  -6  -3    0.00    0.45 
   9  -6  -2    0.00    0.56 
   9  -6  -1    6.46    0.70 
   9  -6   0    5.23    0.60 
   9  -6   1    0.39    0.46 
   9  -6   2    7.63    1.13 
   9  -6   3    1.09    0.49 
   9  -6   4    1.12    0.87 
   9  -6   5    0.00    0.94 
   9  -6   6    2.07    0.83 
   9  -6   7    6.04    1.08 
   9  -6   8    0.26    0.55 
   9  -6   9    0.08    0.87 
   9  -6  10    1.04    1.22 
   9  -7 -11    0.00    1.19 
   9  -7 -10    0.00    1.36 
   9  -7  -9    0.47    0.94 
   9  -7  -8    5.44    0.81 
   9  -7  -7    0.00    0.88 
   9  -7  -6    4.09    1.21 
   9  -7  -5    1.68    0.92 
   9  -7  -4    1.35    1.17 
   9  -7  -3    1.33    0.91 
   9  -7  -2    5.00    0.70 
   9  -7  -1    0.71    0.64 
   9  -7   0    8.34    0.92 
   9  -7   1    0.99    0.86 
   9  -7   2    3.70    0.82 
   9  -7   3    7.10    1.14 
   9  -7   4    2.72    1.19 
   9  -7   5    0.12    1.21 
   9  -7   6    2.02    0.70 
   9  -7   7    0.00    0.98 
   9  -7   8    1.83    0.77 
   9  -7   9    0.00    0.78 
   9  -8 -10    2.76    1.53 
   9  -8  -9    0.00    0.85 
   9  -8  -8    0.35    0.57 
   9  -8  -7    0.00    0.84 
   9  -8  -6    0.00    1.27 
   9  -8  -5    2.89    1.13 
   9  -8  -4    1.94    1.08 
   9  -8  -3    0.47    1.13 
   9  -8  -2    1.10    0.85 
   9  -8  -1    2.92    0.93 
   9  -8   0    5.04    0.89 
   9  -8   1    0.53    0.97 
   9  -8   2   11.85    1.24 
   9  -8   3    0.55    1.16 
   9  -8   4    3.86    1.25 
   9  -8   5    3.74    1.13 
   9  -8   6    3.72    1.01 
   9  -8   7    1.04    1.01 
   9  -8   8    2.56    0.63 
   9  -9  -9    0.86    0.96 
   9  -9  -8    3.50    0.79 
   9  -9  -7    0.00    0.87 
   9  -9  -6    2.14    1.28 
   9  -9  -5    1.19    1.08 
   9  -9  -4    0.00    1.20 
   9  -9  -3    3.09    1.35 
   9  -9  -2    4.33    1.02 
   9  -9  -1    0.74    0.89 
   9  -9   0    0.42    0.59 
   9  -9   1    0.93    1.06 
   9  -9   2    0.00    0.90 
   9  -9   3    1.94    1.38 
   9  -9   4    0.28    1.42 
   9  -9   5    0.00    1.46 
   9  -9   6    1.62    0.87 
   9  -9   7    2.02    1.30 
   9 -10  -7    0.00    1.02 
   9 -10  -6    0.00    1.32 
   9 -10  -5    0.37    1.15 
   9 -10  -4    1.37    1.29 
   9 -10  -3    0.08    1.44 
   9 -10  -2    0.95    1.00 
   9 -10  -1    1.36    1.03 
   9 -10   0    2.83    1.02 
   9 -10   1    0.76    1.22 
   9 -10   2    0.94    1.23 
   9 -10   3    0.00    1.54 
   9 -10   4    1.66    1.40 
   9 -10   5    0.00    1.66 
   9 -11  -4    1.65    1.51 
   9 -11  -3    2.56    1.61 
   9 -11  -2    1.45    1.07 
   9 -11  -1    2.30    0.85 
   9 -11   0    1.03    0.84 
   9 -11   1    2.66    1.04 
   9 -11   2    0.00    1.20 
  10   0 -13    0.00    2.14 
  10   0 -12    0.00    1.68 
  10   0 -11    1.79    1.44 
  10   0 -10    4.41    1.69 
  10   0  -9    0.00    0.99 
  10   0  -8    0.05    0.72 
  10   0  -7    0.06    0.88 
  10   0  -6  121.70    2.45 
  10   0  -5    0.68    0.73 
  10   0  -4   91.90    1.98 
  10   0  -3    0.16    0.33 
  10   0  -2  145.18    1.52 
  10   0  -1    1.39    0.33 
  10   0   0    9.39    0.58 
  10   0   1    0.57    0.34 
  10   0   2   29.51    0.82 
  10   0   3    1.61    0.85 
  10   0   4    0.64    1.30 
  10   0   5    0.00    1.07 
  10   0   6    8.89    1.17 
  10   0   7    0.88    1.08 
  10   0   8    7.28    1.56 
  10   0   9    0.00    1.21 
  10   0  10   15.50    2.33 
  10   0  11    0.00    1.72 
  10  -1 -13    1.61    1.77 
  10  -1 -12    7.14    1.37 
  10  -1 -11    0.13    0.95 
  10  -1 -10    7.26    1.00 
  10  -1  -9    2.93    0.76 
  10  -1  -8   46.99    1.12 
  10  -1  -7    6.87    0.76 
  10  -1  -6   20.74    0.70 
  10  -1  -5    8.23    0.57 
  10  -1  -4   16.63    0.64 
  10  -1  -3    8.51    0.44 
  10  -1  -2    9.91    0.35 
  10  -1  -1    0.51    0.23 
  10  -1   0    0.80    0.20 
  10  -1   1   14.09    0.41 
  10  -1   2   68.39    0.92 
  10  -1   3    4.62    0.45 
  10  -1   4  143.16    1.72 
  10  -1   5    4.51    0.81 
  10  -1   6   17.38    0.94 
  10  -1   7    0.00    0.77 
  10  -1   8    1.35    0.83 
  10  -1   9    1.88    0.88 
  10  -1  10    3.58    1.36 
  10  -1  11    1.45    1.22 
  10  -2 -13    4.87    1.57 
  10  -2 -12    2.77    1.33 
  10  -2 -11    7.30    1.16 
  10  -2 -10    5.27    1.24 
  10  -2  -9    5.52    0.87 
  10  -2  -8    1.28    0.42 
  10  -2  -7    8.51    0.66 
  10  -2  -6   87.39    1.24 
  10  -2  -5    0.65    0.52 
  10  -2  -4    8.99    0.92 
  10  -2  -3    0.89    0.22 
  10  -2  -2   30.32    0.82 
  10  -2  -1   25.21    0.68 
  10  -2   0    0.67    0.17 
  10  -2   1   15.00    0.57 
  10  -2   2    0.91    0.32 
  10  -2   3   50.88    0.72 
  10  -2   4    2.41    0.58 
  10  -2   5    4.57    0.84 
  10  -2   6    2.73    0.60 
  10  -2   7    2.49    0.80 
  10  -2   8    9.23    1.19 
  10  -2   9    0.56    0.89 
  10  -2  10    5.62    1.53 
  10  -2  11    0.00    1.29 
  10  -3 -13    0.00    1.48 
  10  -3 -12    1.70    1.39 
  10  -3 -11    1.88    1.20 
  10  -3 -10    0.00    1.15 
  10  -3  -9    6.41    0.76 
  10  -3  -8   12.90    0.84 
  10  -3  -7   47.17    1.19 
  10  -3  -6    0.84    0.39 
  10  -3  -5   27.51    0.74 
  10  -3  -4   19.37    0.60 
  10  -3  -3   19.01    0.48 
  10  -3  -2   15.30    0.70 
  10  -3  -1    4.37    0.34 
  10  -3   0    0.17    0.19 
  10  -3   1    8.60    0.38 
  10  -3   2   14.04    0.63 
  10  -3   3    5.65    0.62 
  10  -3   4   19.09    0.64 
  10  -3   5   10.60    0.84 
  10  -3   6    1.61    0.61 
  10  -3   7    4.93    1.08 
  10  -3   8    1.34    0.63 
  10  -3   9    6.84    1.10 
  10  -3  10    2.39    1.73 
  10  -3  11    4.31    1.41 
  10  -4 -13    6.28    1.71 
  10  -4 -12    0.00    1.63 
  10  -4 -11    8.19    1.32 
  10  -4 -10    1.06    0.78 
  10  -4  -9    9.18    1.06 
  10  -4  -8    2.49    0.57 
  10  -4  -7   11.99    0.87 
  10  -4  -6    2.20    0.55 
  10  -4  -5    2.89    0.58 
  10  -4  -4    2.63    0.54 
  10  -4  -3    0.00    0.36 
  10  -4  -2    0.63    0.33 
  10  -4  -1   33.44    0.58 
  10  -4   0    0.80    0.19 
  10  -4   1   26.43    0.57 
  10  -4   2    7.20    0.60 
  10  -4   3   29.06    0.69 
  10  -4   4    2.02    0.65 
  10  -4   5    4.58    0.86 
  10  -4   6    3.09    0.69 
  10  -4   7    9.46    0.93 
  10  -4   8    2.41    0.74 
  10  -4   9    0.05    0.88 
  10  -4  10    0.90    0.86 
  10  -4  11    0.00    1.33 
  10  -5 -12    4.64    1.60 
  10  -5 -11    0.87    1.27 
  10  -5 -10    5.25    0.94 
  10  -5  -9    3.16    0.77 
  10  -5  -8    1.44    0.48 
  10  -5  -7   13.27    1.08 
  10  -5  -6    1.11    0.64 
  10  -5  -5   16.53    1.04 
  10  -5  -4    8.46    0.69 
  10  -5  -3   15.18    0.95 
  10  -5  -2    7.98    0.54 
  10  -5  -1    9.25    0.68 
  10  -5   0   26.56    0.75 
  10  -5   1   38.58    0.87 
  10  -5   2    3.33    0.67 
  10  -5   3    2.62    0.58 
  10  -5   4    0.45    0.68 
  10  -5   5    6.36    0.86 
  10  -5   6    4.76    0.89 
  10  -5   7    4.09    0.93 
  10  -5   8    2.84    0.88 
  10  -5   9    0.00    0.92 
  10  -5  10    0.33    1.51 
  10  -6 -11    5.71    1.25 
  10  -6 -10    1.42    0.88 
  10  -6  -9    1.52    1.03 
  10  -6  -8    0.39    0.43 
  10  -6  -7    6.70    0.96 
  10  -6  -6    2.80    0.80 
  10  -6  -5    0.00    0.75 
  10  -6  -4    8.00    1.03 
  10  -6  -3    0.03    0.56 
  10  -6  -2   38.06    1.15 
  10  -6  -1   10.43    0.81 
  10  -6   0   17.59    0.94 
  10  -6   1    9.96    0.87 
  10  -6   2    1.85    0.62 
  10  -6   3   15.14    1.03 
  10  -6   4    0.00    1.01 
  10  -6   5    0.17    0.81 
  10  -6   6    0.78    0.75 
  10  -6   7    1.32    0.75 
  10  -6   8    0.70    0.61 
  10  -6   9    0.34    0.91 
  10  -7 -11    0.00    1.25 
  10  -7 -10    8.89    1.40 
  10  -7  -9    0.96    0.96 
  10  -7  -8    2.49    0.63 
  10  -7  -7    0.39    1.00 
  10  -7  -6    0.93    0.79 
  10  -7  -5    5.73    1.03 
  10  -7  -4    0.00    0.90 
  10  -7  -3    0.00    1.02 
  10  -7  -2    0.51    0.77 
  10  -7  -1    0.36    0.59 
  10  -7   0    8.19    0.88 
  10  -7   1    5.13    0.75 
  10  -7   2    1.99    1.05 
  10  -7   3    0.70    1.04 
  10  -7   4   10.45    1.14 
  10  -7   5    4.27    1.08 
  10  -7   6    8.01    1.14 
  10  -7   7    0.00    0.80 
  10  -7   8    5.21    0.97 
  10  -7   9    0.00    0.81 
  10  -8 -10    4.21    1.52 
  10  -8  -9    0.00    0.94 
  10  -8  -8    1.75    0.69 
  10  -8  -7    0.48    0.93 
  10  -8  -6    4.70    1.29 
  10  -8  -5    2.08    1.26 
  10  -8  -4    8.02    1.36 
  10  -8  -3    1.99    1.11 
  10  -8  -2   13.24    1.20 
  10  -8  -1    0.48    0.84 
  10  -8   0    1.63    0.69 
  10  -8   1    2.37    0.81 
  10  -8   2    0.00    0.84 
  10  -8   3    0.00    1.13 
  10  -8   4    0.00    1.26 
  10  -8   5    0.00    1.11 
  10  -8   6    0.74    0.94 
  10  -8   7    2.66    0.86 
  10  -8   8    1.99    0.73 
  10  -9  -8    0.81    0.65 
  10  -9  -7    1.23    0.90 
  10  -9  -6    0.00    1.46 
  10  -9  -5    1.41    1.19 
  10  -9  -4    0.00    1.17 
  10  -9  -3    1.30    1.26 
  10  -9  -2    1.00    0.88 
  10  -9  -1    0.81    0.89 
  10  -9   0    6.25    1.02 
  10  -9   1    1.44    1.05 
  10  -9   2    1.14    1.04 
  10  -9   3    2.22    1.27 
  10  -9   4    0.00    1.26 
  10  -9   5    0.00    1.16 
  10  -9   6    3.58    1.07 
  10 -10  -6    0.20    1.40 
  10 -10  -5    0.23    1.21 
  10 -10  -4    3.52    1.34 
  10 -10  -3    0.90    1.36 
  10 -10  -2    3.80    1.13 
  10 -10  -1    1.95    1.01 
  10 -10   0    0.53    0.78 
  10 -10   1    0.52    0.97 
  10 -10   2    0.58    0.99 
  10 -10   3    0.00    1.48 
  10 -10   4    0.00    1.44 
  10 -11  -3    1.18    0.76 
  10 -11  -2    1.32    1.13 
  10 -11  -1    4.00    1.04 
  10 -11   0    0.22    0.82 
  10 -11   1    1.13    1.00 
  11   0 -13    0.00    2.07 
  11   0 -12    8.36    2.02 
  11   0 -11    1.53    1.46 
  11   0 -10   28.71    2.16 
  11   0  -9    0.10    0.97 
  11   0  -8   56.19    2.42 
  11   0  -7    0.04    0.88 
  11   0  -6   29.97    1.52 
  11   0  -5    0.00    0.97 
  11   0  -4    6.32    0.94 
  11   0  -3    0.00    0.70 
  11   0  -2    0.00    0.72 
  11   0  -1    0.94    0.36 
  11   0   0    0.34    0.39 
  11   0   1    0.71    0.36 
  11   0   2  117.83    1.64 
  11   0   3    1.27    0.85 
  11   0   4   21.93    2.43 
  11   0   5    0.02    1.19 
  11   0   6    0.52    0.78 
  11   0   7    0.72    1.25 
  11   0   8    4.83    1.44 
  11   0   9    0.64    1.23 
  11   0  10    6.81    2.14 
  11   0  11    0.11    1.85 
  11  -1 -13    0.78    1.47 
  11  -1 -12    4.01    1.40 
  11  -1 -11    1.23    0.98 
  11  -1 -10    0.00    1.10 
  11  -1  -9    1.08    0.82 
  11  -1  -8    7.41    0.86 
  11  -1  -7    1.25    0.65 
  11  -1  -6   63.58    1.28 
  11  -1  -5    0.32    0.60 
  11  -1  -4   12.15    0.67 
  11  -1  -3    0.69    0.31 
  11  -1  -2   46.95    0.81 
  11  -1  -1   10.53    0.43 
  11  -1   0    5.98    0.38 
  11  -1   1    3.30    0.36 
  11  -1   2   39.13    0.67 
  11  -1   3    1.59    0.58 
  11  -1   4   12.99    0.94 
  11  -1   5    1.41    0.78 
  11  -1   6    1.02    0.58 
  11  -1   7    1.09    0.81 
  11  -1   8    5.24    1.05 
  11  -1   9    0.06    0.82 
  11  -1  10    6.75    1.66 
  11  -1  11    1.96    1.34 
  11  -2 -13    0.00    1.52 
  11  -2 -12    2.85    1.34 
  11  -2 -11    0.87    1.07 
  11  -2 -10   11.20    1.25 
  11  -2  -9    1.04    0.73 
  11  -2  -8   39.71    1.19 
  11  -2  -7    5.67    0.64 
  11  -2  -6    0.54    0.40 
  11  -2  -5    1.53    0.58 
  11  -2  -4    0.01    0.73 
  11  -2  -3    8.38    0.45 
  11  -2  -2    1.04    0.29 
  11  -2  -1   10.11    0.53 
  11  -2   0    0.81    0.20 
  11  -2   1   32.78    0.53 
  11  -2   2  115.29    1.12 
  11  -2   3    0.72    0.36 
  11  -2   4   30.52    1.01 
  11  -2   5    1.51    0.83 
  11  -2   6    0.19    0.57 
  11  -2   7    1.63    0.82 
  11  -2   8    3.66    0.99 
  11  -2   9    2.33    0.96 
  11  -2  10    5.23    1.25 
  11  -2  11    4.51    1.46 
  11  -3 -13    5.22    1.76 
  11  -3 -12    2.11    1.27 
  11  -3 -11    2.93    1.19 
  11  -3 -10    2.26    0.96 
  11  -3  -9   10.13    0.95 
  11  -3  -8    1.33    0.45 
  11  -3  -7   22.32    1.08 
  11  -3  -6   16.31    0.82 
  11  -3  -5   10.29    0.69 
  11  -3  -4    1.93    0.46 
  11  -3  -3    0.31    0.30 
  11  -3  -2    3.82    0.70 
  11  -3  -1    4.33    0.46 
  11  -3   0    1.55    0.24 
  11  -3   1    4.71    0.41 
  11  -3   2   10.26    0.71 
  11  -3   3   14.65    0.90 
  11  -3   4    5.89    0.54 
  11  -3   5    8.86    0.83 
  11  -3   6    1.86    0.63 
  11  -3   7   11.28    1.04 
  11  -3   8    0.28    0.50 
  11  -3   9    6.30    1.10 
  11  -3  10    1.96    1.21 
  11  -3  11    0.98    0.69 
  11  -4 -12    2.65    1.41 
  11  -4 -11    0.00    1.17 
  11  -4 -10    3.23    0.98 
  11  -4  -9    2.38    0.75 
  11  -4  -8    0.66    0.45 
  11  -4  -7   12.99    0.84 
  11  -4  -6    7.28    0.73 
  11  -4  -5   15.31    0.93 
  11  -4  -4    3.88    0.58 
  11  -4  -3   23.90    0.55 
  11  -4  -2   10.79    0.51 
  11  -4  -1    9.31    0.41 
  11  -4   0    8.47    0.42 
  11  -4   1   37.99    0.65 
  11  -4   2    7.96    0.80 
  11  -4   3    0.00    0.74 
  11  -4   4    1.80    0.45 
  11  -4   5    0.00    0.73 
  11  -4   6    1.93    0.65 
  11  -4   7    1.19    0.72 
  11  -4   8    0.62    0.55 
  11  -4   9    1.07    0.95 
  11  -4  10    3.01    1.58 
  11  -5 -12    1.66    1.51 
  11  -5 -11    1.55    1.25 
  11  -5 -10    3.22    0.89 
  11  -5  -9    5.19    0.92 
  11  -5  -8    0.13    0.49 
  11  -5  -7   13.45    0.98 
  11  -5  -6    0.07    0.43 
  11  -5  -5    2.94    0.69 
  11  -5  -4    8.45    0.78 
  11  -5  -3    0.35    0.50 
  11  -5  -2   11.09    0.62 
  11  -5  -1   11.44    0.74 
  11  -5   0    0.19    0.30 
  11  -5   1    4.10    0.66 
  11  -5   2    3.80    0.55 
  11  -5   3    6.77    0.53 
  11  -5   4    0.90    0.68 
  11  -5   5    3.00    0.78 
  11  -5   6    1.21    0.68 
  11  -5   7    7.27    0.92 
  11  -5   8    3.10    0.85 
  11  -5   9    0.72    0.84 
  11  -5  10    1.29    1.11 
  11  -6 -11    0.00    1.32 
  11  -6 -10    1.69    0.84 
  11  -6  -9    4.52    0.77 
  11  -6  -8    0.87    0.51 
  11  -6  -7   13.92    1.08 
  11  -6  -6    0.46    0.63 
  11  -6  -5    4.06    0.86 
  11  -6  -4    2.85    0.82 
  11  -6  -3    3.72    0.87 
  11  -6  -2    3.04    0.64 
  11  -6  -1    5.74    0.63 
  11  -6   0    1.90    0.47 
  11  -6   1    5.51    0.63 
  11  -6   2    0.97    0.50 
  11  -6   3    0.00    0.84 
  11  -6   4    0.00    0.97 
  11  -6   5    0.00    0.87 
  11  -6   6    3.16    0.96 
  11  -6   7    2.13    0.79 
  11  -6   8    2.41    0.71 
  11  -6   9    0.00    0.84 
  11  -7 -10    2.66    0.85 
  11  -7  -9    0.96    1.04 
  11  -7  -8    0.69    0.54 
  11  -7  -7    6.94    1.10 
  11  -7  -6    2.91    0.78 
  11  -7  -5    0.24    1.43 
  11  -7  -4   10.23    1.10 
  11  -7  -3    0.57    0.93 
  11  -7  -2   17.59    1.04 
  11  -7  -1    5.03    0.68 
  11  -7   0    0.26    0.39 
  11  -7   1    1.98    0.63 
  11  -7   2    0.24    0.76 
  11  -7   3    6.12    1.07 
  11  -7   4    1.64    0.89 
  11  -7   5    1.24    0.87 
  11  -7   6    2.12    0.73 
  11  -7   7    0.16    0.82 
  11  -7   8    1.57    0.80 
  11  -8  -9    0.53    1.04 
  11  -8  -8    1.85    0.59 
  11  -8  -7    0.07    0.99 
  11  -8  -6    2.53    0.94 
  11  -8  -5    0.00    1.03 
  11  -8  -4    5.91    1.17 
  11  -8  -3    1.34    1.05 
  11  -8  -2    0.86    0.84 
  11  -8  -1    0.48    0.45 
  11  -8   0    1.15    0.50 
  11  -8   1    2.01    0.54 
  11  -8   2    4.32    0.96 
  11  -8   3    2.44    1.09 
  11  -8   4    5.04    1.29 
  11  -8   5    1.77    1.13 
  11  -8   6    0.00    1.45 
  11  -8   7    1.89    1.15 
  11  -9  -8    1.45    0.46 
  11  -9  -7    0.00    0.94 
  11  -9  -6    1.09    1.35 
  11  -9  -5    3.86    1.25 
  11  -9  -4    8.79    1.29 
  11  -9  -3    0.00    1.18 
  11  -9  -2    4.57    1.05 
  11  -9  -1    0.71    0.50 
  11  -9   0    1.22    0.63 
  11  -9   1    0.47    0.45 
  11  -9   2    0.00    0.96 
  11  -9   3    0.00    1.25 
  11  -9   4    2.11    1.18 
  11  -9   5    1.80    1.24 
  11 -10  -5    2.98    1.61 
  11 -10  -4    0.00    1.26 
  11 -10  -3    4.16    1.36 
  11 -10  -2    0.94    0.98 
  11 -10  -1    1.90    0.70 
  11 -10   0    0.42    0.37 
  11 -10   1    0.92    0.48 
  11 -10   2    1.87    1.05 
  11 -10   3    2.36    1.42 
  12   0 -13    0.61    2.17 
  12   0 -12    5.32    2.03 
  12   0 -11    0.63    1.42 
  12   0 -10    2.70    1.61 
  12   0  -9    0.00    1.03 
  12   0  -8    0.02    0.73 
  12   0  -7    0.20    0.95 
  12   0  -6    8.90    1.11 
  12   0  -5    0.30    0.99 
  12   0  -4   29.01    1.12 
  12   0  -3    0.00    0.68 
  12   0  -2    8.23    1.37 
  12   0  -1    1.20    0.54 
  12   0   0   16.05    0.80 
  12   0   1    1.33    0.49 
  12   0   2    7.04    1.04 
  12   0   3    0.55    1.20 
  12   0   4    3.40    1.49 
  12   0   5    0.17    1.24 
  12   0   6   12.75    1.34 
  12   0   7    0.00    1.14 
  12   0   8    0.40    1.05 
  12   0   9    1.40    1.29 
  12   0  10    0.58    2.05 
  12   0  11    0.53    0.86 
  12  -1 -13    0.00    1.52 
  12  -1 -12    2.27    1.33 
  12  -1 -11    1.83    1.01 
  12  -1 -10    4.85    1.10 
  12  -1  -9    0.02    0.71 
  12  -1  -8    3.73    0.73 
  12  -1  -7    0.00    0.63 
  12  -1  -6    3.15    0.54 
  12  -1  -5    1.03    0.72 
  12  -1  -4   33.65    1.37 
  12  -1  -3    2.50    0.46 
  12  -1  -2    6.97    0.58 
  12  -1  -1   10.16    0.49 
  12  -1   0    1.24    0.25 
  12  -1   1   18.88    0.57 
  12  -1   2   43.04    0.89 
  12  -1   3    2.50    0.75 
  12  -1   4   14.20    1.15 
  12  -1   5    1.09    0.81 
  12  -1   6    7.06    0.84 
  12  -1   7    0.18    0.81 
  12  -1   8    2.16    0.91 
  12  -1   9    0.41    0.90 
  12  -1  10    5.08    1.30 
  12  -2 -13    0.67    1.63 
  12  -2 -12    6.63    1.37 
  12  -2 -11    0.06    1.12 
  12  -2 -10    0.94    0.71 
  12  -2  -9    4.95    0.88 
  12  -2  -8    1.09    0.41 
  12  -2  -7   17.16    0.98 
  12  -2  -6    0.24    0.41 
  12  -2  -5    6.67    0.70 
  12  -2  -4    0.81    0.45 
  12  -2  -3    2.05    0.32 
  12  -2  -2   13.57    0.98 
  12  -2  -1    9.07    0.39 
  12  -2   0    8.72    0.41 
  12  -2   1    2.04    0.37 
  12  -2   2    0.88    0.50 
  12  -2   3    1.02    0.44 
  12  -2   4    1.61    0.85 
  12  -2   5    9.57    0.84 
  12  -2   6    6.06    0.84 
  12  -2   7    4.55    0.94 
  12  -2   8    0.03    0.80 
  12  -2   9    6.48    1.11 
  12  -2  10    2.40    1.11 
  12  -3 -12    0.00    1.30 
  12  -3 -11    5.33    1.11 
  12  -3 -10    4.52    0.95 
  12  -3  -9    5.20    0.91 
  12  -3  -8    4.05    0.64 
  12  -3  -7    3.64    0.63 
  12  -3  -6    5.50    0.60 
  12  -3  -5    2.44    0.68 
  12  -3  -4    6.53    0.44 
  12  -3  -3    1.72    0.91 
  12  -3  -2    2.11    0.73 
  12  -3  -1   12.39    0.69 
  12  -3   0    8.30    0.38 
  12  -3   1   12.37    0.61 
  12  -3   2   12.29    0.75 
  12  -3   3    1.77    0.84 
  12  -3   4    8.72    0.59 
  12  -3   5   10.45    0.98 
  12  -3   6    1.78    0.67 
  12  -3   7    1.52    0.82 
  12  -3   8    1.54    0.87 
  12  -3   9    3.52    1.08 
  12  -3  10    2.19    1.15 
  12  -4 -12    0.00    1.38 
  12  -4 -11    0.00    1.18 
  12  -4 -10    2.12    0.97 
  12  -4  -9    7.18    0.88 
  12  -4  -8    1.56    0.53 
  12  -4  -7   20.48    1.16 
  12  -4  -6    3.92    0.64 
  12  -4  -5    4.80    0.72 
  12  -4  -4    1.87    0.53 
  12  -4  -3    4.25    0.82 
  12  -4  -2    6.38    0.89 
  12  -4  -1    5.14    0.46 
  12  -4   0    6.09    0.42 
  12  -4   1    0.50    0.35 
  12  -4   2    0.00    0.68 
  12  -4   3    0.88    0.70 
  12  -4   4    2.93    0.94 
  12  -4   5    7.52    0.84 
  12  -4   6    0.95    0.62 
  12  -4   7    4.08    0.89 
  12  -4   8    0.03    0.55 
  12  -4   9    2.71    1.02 
  12  -4  10    6.29    1.70 
  12  -5 -11    2.43    1.26 
  12  -5 -10    3.05    0.99 
  12  -5  -9    2.85    0.78 
  12  -5  -8    0.86    0.47 
  12  -5  -7    1.12    0.64 
  12  -5  -6    4.04    0.71 
  12  -5  -5    1.25    0.71 
  12  -5  -4    1.21    0.57 
  12  -5  -3    3.00    0.40 
  12  -5  -2    1.44    0.48 
  12  -5  -1   12.84    0.86 
  12  -5   0    7.92    0.66 
  12  -5   1   32.14    1.04 
  12  -5   2    4.29    0.50 
  12  -5   3    0.00    0.96 
  12  -5   4    0.00    1.04 
  12  -5   5    2.55    0.82 
  12  -5   6    0.35    0.64 
  12  -5   7    4.00    0.87 
  12  -5   8    2.43    0.61 
  12  -5   9    0.40    0.98 
  12  -6 -11    0.00    1.32 
  12  -6 -10    4.25    1.01 
  12  -6  -9    3.63    0.79 
  12  -6  -8    1.48    0.50 
  12  -6  -7   10.39    0.97 
  12  -6  -6    0.00    0.57 
  12  -6  -5    0.91    0.68 
  12  -6  -4    7.81    0.91 
  12  -6  -3    4.14    0.71 
  12  -6  -2    0.00    0.49 
  12  -6  -1    1.17    0.41 
  12  -6   0    0.69    0.35 
  12  -6   1    0.21    0.35 
  12  -6   2    6.14    0.93 
  12  -6   3    2.87    0.66 
  12  -6   4    4.22    1.04 
  12  -6   5    0.00    0.99 
  12  -6   6    2.46    1.19 
  12  -6   7    0.00    0.93 
  12  -6   8    2.29    0.96 
  12  -7 -10    0.22    0.86 
  12  -7  -9    1.27    0.95 
  12  -7  -8    1.58    0.64 
  12  -7  -7    3.46    0.99 
  12  -7  -6    6.51    0.92 
  12  -7  -5    1.47    0.97 
  12  -7  -4    3.47    1.07 
  12  -7  -3    1.08    0.99 
  12  -7  -2    0.38    0.75 
  12  -7  -1    0.57    0.36 
  12  -7   0    7.69    0.81 
  12  -7   1    1.36    0.50 
  12  -7   2    0.52    0.68 
  12  -7   3    3.29    0.86 
  12  -7   4    0.01    1.17 
  12  -7   5    0.00    1.06 
  12  -7   6    3.72    0.98 
  12  -7   7    0.00    0.98 
  12  -8  -9    0.00    1.03 
  12  -8  -8    2.79    0.68 
  12  -8  -7    0.00    0.93 
  12  -8  -6    0.68    0.55 
  12  -8  -5    3.33    1.04 
  12  -8  -4    1.73    1.11 
  12  -8  -3    0.00    1.04 
  12  -8  -2    0.00    0.92 
  12  -8  -1    0.90    0.43 
  12  -8   0    1.20    0.50 
  12  -8   1    0.34    0.54 
  12  -8   2    5.62    0.92 
  12  -8   3    0.37    1.06 
  12  -8   4    6.83    1.43 
  12  -8   5    0.00    1.06 
  12  -8   6    0.00    1.40 
  12  -9  -7    1.21    1.13 
  12  -9  -6    1.76    0.67 
  12  -9  -5    1.27    1.09 
  12  -9  -4    4.13    1.18 
  12  -9  -3    0.85    1.18 
  12  -9  -2    2.06    0.96 
  12  -9  -1    1.81    0.46 
  12  -9   0    0.63    0.48 
  12  -9   1    0.74    0.54 
  12  -9   2    0.33    0.89 
  12  -9   3    2.96    1.24 
  12  -9   4    0.00    1.10 
  12  -9   5    0.72    1.67 
  12 -10  -4    3.20    1.31 
  12 -10  -3    1.04    1.30 
  12 -10  -2    0.00    1.03 
  12 -10  -1    1.52    0.54 
  12 -10   0    1.05    0.55 
  12 -10   1    1.01    0.50 
  12 -10   2    0.71    0.97 
  13   0 -13    0.00    2.13 
  13   0 -12    4.54    2.24 
  13   0 -11    1.97    1.51 
  13   0 -10    2.58    1.66 
  13   0  -9    1.03    1.08 
  13   0  -8    3.34    1.04 
  13   0  -7    0.00    0.93 
  13   0  -6    8.77    1.06 
  13   0  -5    0.73    1.12 
  13   0  -4   69.91    2.28 
  13   0  -3    0.00    1.10 
  13   0  -2   12.36    0.88 
  13   0  -1    3.83    1.21 
  13   0   0    3.91    0.88 
  13   0   1    0.76    1.26 
  13   0   2    4.05    1.20 
  13   0   3    0.76    1.51 
  13   0   4    9.72    1.68 
  13   0   5    1.37    1.34 
  13   0   6    9.31    1.48 
  13   0   7    1.29    1.26 
  13   0   8    0.00    1.09 
  13   0   9    0.49    1.46 
  13   0  10    7.84    2.31 
  13  -1 -12    7.01    1.41 
  13  -1 -11    1.63    1.03 
  13  -1 -10    9.93    1.32 
  13  -1  -9    2.57    0.80 
  13  -1  -8    5.88    0.84 
  13  -1  -7    2.20    0.71 
  13  -1  -6    0.97    0.48 
  13  -1  -5    0.00    0.69 
  13  -1  -4    3.81    0.81 
  13  -1  -3    4.54    0.62 
  13  -1  -2    2.87    0.70 
  13  -1  -1    1.34    0.43 
  13  -1   0   14.91    0.58 
  13  -1   1    4.12    0.66 
  13  -1   2    2.45    0.74 
  13  -1   3    3.73    0.83 
  13  -1   4   35.52    1.25 
  13  -1   5    0.00    0.89 
  13  -1   6    7.40    0.86 
  13  -1   7    0.57    0.86 
  13  -1   8    1.30    0.95 
  13  -1   9    1.84    1.00 
  13  -1  10    1.04    1.13 
  13  -2 -12    4.81    1.44 
  13  -2 -11    0.00    1.11 
  13  -2 -10    0.00    1.21 
  13  -2  -9    4.08    0.95 
  13  -2  -8    3.69    0.75 
  13  -2  -7    4.56    0.68 
  13  -2  -6    4.24    0.55 
  13  -2  -5    8.49    0.70 
  13  -2  -4    4.44    0.80 
  13  -2  -3    1.99    0.37 
  13  -2  -2    0.01    0.41 
  13  -2  -1   13.26    0.51 
  13  -2   0    0.69    0.24 
  13  -2   1    7.68    0.63 
  13  -2   2    1.94    0.55 
  13  -2   3    5.38    0.59 
  13  -2   4    4.24    0.80 
  13  -2   5    5.08    1.00 
  13  -2   6    4.63    0.86 
  13  -2   7    5.39    1.02 
  13  -2   8    1.03    0.83 
  13  -2   9    1.45    0.99 
  13  -2  10    2.26    1.27 
  13  -3 -12    0.78    1.34 
  13  -3 -11    0.75    1.24 
  13  -3 -10    0.87    0.73 
  13  -3  -9    2.95    0.77 
  13  -3  -8    1.88    0.44 
  13  -3  -7   20.22    0.95 
  13  -3  -6    4.13    0.45 
  13  -3  -5    3.01    0.67 
  13  -3  -4    0.39    0.33 
  13  -3  -3    9.98    0.89 
  13  -3  -2    0.33    0.76 
  13  -3  -1    6.63    0.81 
  13  -3   0    2.14    0.31 
  13  -3   1    0.99    0.46 
  13  -3   2    1.79    0.59 
  13  -3   3    3.53    0.96 
  13  -3   4    0.31    0.86 
  13  -3   5    1.09    0.70 
  13  -3   6    1.29    0.67 
  13  -3   7    0.11    0.88 
  13  -3   8    0.33    0.80 
  13  -3   9    5.72    1.19 
  13  -4 -12    0.54    0.53 
  13  -4 -11    0.00    1.22 
  13  -4 -10    0.00    0.95 
  13  -4  -9    3.95    0.85 
  13  -4  -8    0.99    0.54 
  13  -4  -7    2.40    0.79 
  13  -4  -6    3.96    0.59 
  13  -4  -5    2.27    0.60 
  13  -4  -4    5.13    0.43 
  13  -4  -3    2.10    0.78 
  13  -4  -2    1.56    0.67 
  13  -4  -1    9.95    1.01 
  13  -4   0    1.12    0.35 
  13  -4   1    8.08    0.91 
  13  -4   2    0.31    0.55 
  13  -4   3    0.00    0.91 
  13  -4   4    0.00    1.00 
  13  -4   5   11.19    1.24 
  13  -4   6    0.00    1.15 
  13  -4   7    9.79    1.32 
  13  -4   8    0.00    0.69 
  13  -4   9    1.09    1.23 
  13  -5 -11    0.00    1.22 
  13  -5 -10    4.02    0.96 
  13  -5  -9    4.56    0.77 
  13  -5  -8    6.73    0.79 
  13  -5  -7    5.69    0.83 
  13  -5  -6    3.36    0.67 
  13  -5  -5    0.00    0.63 
  13  -5  -4    0.00    0.52 
  13  -5  -3   15.07    0.65 
  13  -5  -2    0.00    0.41 
  13  -5  -1   14.05    0.64 
  13  -5   0    5.94    0.60 
  13  -5   1    3.92    0.54 
  13  -5   2    7.94    0.93 
  13  -5   3    0.00    0.97 
  13  -5   4    7.70    1.13 
  13  -5   5    0.00    0.98 
  13  -5   6    1.35    1.73 
  13  -5   7    0.00    0.97 
  13  -5   8    3.39    1.30 
  13  -6 -10    2.49    0.98 
  13  -6  -9    2.72    0.75 
  13  -6  -8    0.52    0.42 
  13  -6  -7    0.00    0.64 
  13  -6  -6    7.09    0.92 
  13  -6  -5    4.97    0.74 
  13  -6  -4   11.56    0.83 
  13  -6  -3    1.32    0.52 
  13  -6  -2   23.37    0.86 
  13  -6  -1    6.39    0.63 
  13  -6   0   11.70    0.85 
  13  -6   1    0.72    0.43 
  13  -6   2    5.12    0.74 
  13  -6   3    0.00    1.10 
  13  -6   4    0.81    1.09 
  13  -6   5    3.58    1.11 
  13  -6   6    0.00    1.31 
  13  -6   7    0.74    1.02 
  13  -6   8    2.18    0.96 
  13  -7  -9    0.72    0.65 
  13  -7  -8    4.85    0.71 
  13  -7  -7    2.12    0.70 
  13  -7  -6    1.16    0.62 
  13  -7  -5    1.17    0.72 
  13  -7  -4    0.90    0.74 
  13  -7  -3    0.00    0.71 
  13  -7  -2    0.73    0.60 
  13  -7  -1    1.05    0.39 
  13  -7   0    0.66    0.40 
  13  -7   1    1.01    0.42 
  13  -7   2    1.71    0.89 
  13  -7   3    1.72    1.03 
  13  -7   4   13.90    1.51 
  13  -7   5    0.00    1.26 
  13  -7   6    0.00    1.37 
  13  -7   7    0.20    0.90 
  13  -8  -8    2.26    0.59 
  13  -8  -7    0.20    0.73 
  13  -8  -6    4.66    0.92 
  13  -8  -5    1.65    1.01 
  13  -8  -4    5.61    1.17 
  13  -8  -3    1.73    1.00 
  13  -8  -2    7.33    0.95 
  13  -8  -1    0.64    0.42 
  13  -8   0    1.21    0.53 
  13  -8   1    0.31    0.47 
  13  -8   2    0.00    0.83 
  13  -8   3    1.95    1.13 
  13  -8   4    0.00    1.12 
  13  -8   5    0.00    1.13 
  13  -9  -6    0.53    0.65 
  13  -9  -5    2.29    1.14 
  13  -9  -4    1.53    1.13 
  13  -9  -3    2.87    1.17 
  13  -9  -2    0.00    0.88 
  13  -9  -1    1.84    0.56 
  13  -9   0    1.89    0.57 
  13  -9   1    2.88    0.53 
  13  -9   2    4.36    1.07 
  13  -9   3    1.38    1.15 
  13  -9   4    1.15    0.58 
  13 -10  -3    0.66    0.67 
  13 -10  -2    0.56    0.98 
  13 -10  -1    0.90    0.50 
  13 -10   0    1.25    0.44 
  14   0 -12    3.13    2.03 
  14   0 -11    0.00    1.55 
  14   0 -10    1.99    2.03 
  14   0  -9    0.40    1.11 
  14   0  -8    1.40    0.89 
  14   0  -7    0.00    1.19 
  14   0  -6    0.87    0.73 
  14   0  -5    0.00    1.16 
  14   0  -4    9.90    1.38 
  14   0  -3    0.00    1.55 
  14   0  -2    4.51    1.14 
  14   0  -1    1.28    1.27 
  14   0   0    4.01    0.93 
  14   0   1    1.02    1.34 
  14   0   2    0.39    1.07 
  14   0   3    1.88    1.41 
  14   0   4    3.37    1.65 
  14   0   5    1.18    1.67 
  14   0   6    3.80    1.37 
  14   0   7    0.00    1.20 
  14   0   8    0.94    1.23 
  14   0   9    0.00    1.74 
  14  -1 -12    0.98    1.41 
  14  -1 -11    1.51    1.03 
  14  -1 -10    2.20    1.03 
  14  -1  -9    0.00    0.79 
  14  -1  -8    0.93    0.61 
  14  -1  -7    0.00    0.73 
  14  -1  -6    1.19    0.50 
  14  -1  -5    0.00    0.72 
  14  -1  -4   19.72    1.00 
  14  -1  -3    0.60    0.71 
  14  -1  -2    5.61    0.67 
  14  -1  -1    0.00    0.75 
  14  -1   0    9.43    0.82 
  14  -1   1    1.45    0.83 
  14  -1   2    2.54    0.76 
  14  -1   3    3.22    0.93 
  14  -1   4    0.00    0.94 
  14  -1   5    0.00    0.89 
  14  -1   6    0.00    0.72 
  14  -1   7    1.52    0.93 
  14  -1   8    1.78    0.90 
  14  -1   9    0.00    0.99 
  14  -2 -12    3.05    1.38 
  14  -2 -11    0.00    1.14 
  14  -2 -10    3.14    1.31 
  14  -2  -9    1.21    0.84 
  14  -2  -8    0.43    0.63 
  14  -2  -7    0.37    0.73 
  14  -2  -6    4.92    0.62 
  14  -2  -5    0.13    0.69 
  14  -2  -4    8.08    0.61 
  14  -2  -3    4.61    0.46 
  14  -2  -2    0.55    0.44 
  14  -2  -1   10.97    0.97 
  14  -2   0    3.43    0.55 
  14  -2   1    8.37    1.14 
  14  -2   2    1.72    0.63 
  14  -2   3    2.29    0.65 
  14  -2   4    6.50    0.86 
  14  -2   5    0.38    0.88 
  14  -2   6    1.01    0.81 
  14  -2   7    0.54    0.89 
  14  -2   8    0.44    0.86 
  14  -2   9    2.74    1.08 
  14  -3 -12    0.71    0.68 
  14  -3 -11    2.07    1.23 
  14  -3 -10    0.00    1.61 
  14  -3  -9    5.25    0.98 
  14  -3  -8    0.34    0.47 
  14  -3  -7    9.33    0.89 
  14  -3  -6    1.46    0.53 
  14  -3  -5   10.98    0.80 
  14  -3  -4    5.31    0.97 
  14  -3  -3    1.16    0.87 
  14  -3  -2    1.18    0.61 
  14  -3  -1    0.53    0.48 
  14  -3   0    0.74    0.39 
  14  -3   1    0.52    0.47 
  14  -3   2    0.01    0.72 
  14  -3   3    2.22    0.97 
  14  -3   4    3.77    0.98 
  14  -3   5   10.91    1.27 
  14  -3   6    2.54    1.41 
  14  -3   7    5.16    1.32 
  14  -3   8    0.00    1.20 
  14  -3   9    0.59    1.39 
  14  -4 -11    1.34    1.34 
  14  -4 -10    1.63    0.68 
  14  -4  -9    3.20    0.78 
  14  -4  -8    5.11    0.72 
  14  -4  -7    0.00    0.60 
  14  -4  -6    0.35    0.49 
  14  -4  -5    3.50    0.67 
  14  -4  -4    1.96    0.95 
  14  -4  -3   12.60    1.03 
  14  -4  -2    1.28    0.64 
  14  -4  -1    5.32    0.84 
  14  -4   0    0.33    0.27 
  14  -4   1    4.46    0.79 
  14  -4   2    3.98    0.74 
  14  -4   3    5.04    1.09 
  14  -4   4    0.00    1.04 
  14  -4   5    0.19    0.98 
  14  -4   6    0.00    1.26 
  14  -4   7    0.70    0.88 
  14  -4   8    1.46    1.67 
  14  -5 -10    0.83    1.27 
  14  -5  -9    4.96    0.81 
  14  -5  -8    0.91    0.49 
  14  -5  -7    2.28    0.78 
  14  -5  -6    1.87    0.54 
  14  -5  -5    3.59    0.65 
  14  -5  -4    4.30    1.00 
  14  -5  -3    3.15    0.97 
  14  -5  -2    9.05    1.06 
  14  -5  -1    1.48    0.55 
  14  -5   0    1.29    0.37 
  14  -5   1    0.48    0.41 
  14  -5   2    6.37    0.79 
  14  -5   3    1.20    1.12 
  14  -5   4    0.00    0.97 
  14  -5   5    5.57    1.22 
  14  -5   6    1.36    1.28 
  14  -5   7    2.45    1.11 
  14  -5   8    2.08    1.00 
  14  -6 -10    2.54    0.60 
  14  -6  -9    4.40    0.78 
  14  -6  -8    3.45    0.64 
  14  -6  -7    0.00    0.66 
  14  -6  -6    0.29    0.62 
  14  -6  -5    1.25    0.95 
  14  -6  -4    1.88    1.00 
  14  -6  -3    2.08    1.04 
  14  -6  -2    0.00    0.79 
  14  -6  -1    0.78    0.32 
  14  -6   0    0.12    0.33 
  14  -6   1    0.80    0.43 
  14  -6   2    4.26    0.84 
  14  -6   3    0.09    1.05 
  14  -6   4    0.00    1.10 
  14  -6   5    0.00    1.01 
  14  -6   6    0.17    1.48 
  14  -6   7    0.00    0.96 
  14  -7  -9    0.56    0.66 
  14  -7  -8    1.59    0.54 
  14  -7  -7    1.59    0.70 
  14  -7  -6    2.92    0.69 
  14  -7  -5    3.02    0.96 
  14  -7  -4    7.03    1.11 
  14  -7  -3    0.08    0.95 
  14  -7  -2    8.96    1.02 
  14  -7  -1    0.37    0.37 
  14  -7   0    1.05    0.45 
  14  -7   1    1.12    0.40 
  14  -7   2    1.74    0.61 
  14  -7   3    0.90    1.21 
  14  -7   4    0.00    1.04 
  14  -7   5    0.85    1.21 
  14  -7   6    1.78    1.66 
  14  -8  -7    0.00    1.29 
  14  -8  -6    8.99    1.34 
  14  -8  -5    3.38    0.91 
  14  -8  -4    5.77    1.36 
  14  -8  -3    2.49    1.02 
  14  -8  -2    2.05    0.84 
  14  -8  -1    0.16    0.34 
  14  -8   0    1.86    0.52 
  14  -8   1    1.13    0.49 
  14  -8   2    5.07    1.11 
  14  -8   3    0.00    1.31 
  14  -8   4    0.00    1.13 
  14  -9  -5    1.16    1.74 
  14  -9  -4    5.05    0.97 
  14  -9  -3    2.09    1.03 
  14  -9  -2    1.40    1.02 
  14  -9  -1    0.55    0.57 
  14  -9   0    1.67    0.52 
  14  -9   1    2.68    0.75 
  14  -9   2    3.52    0.82 
  15   0 -12    2.47    1.04 
  15   0 -11    1.28    1.58 
  15   0 -10    0.92    1.90 
  15   0  -9    0.04    1.12 
  15   0  -8    0.07    0.79 
  15   0  -7    0.45    1.02 
  15   0  -6    0.32    0.73 
  15   0  -5    0.00    1.23 
  15   0  -4   11.65    1.54 
  15   0  -3    0.54    1.28 
  15   0  -2    0.08    1.04 
  15   0  -1    0.00    1.38 
  15   0   0    4.28    0.99 
  15   0   1    1.11    1.44 
  15   0   2    6.29    1.88 
  15   0   3    0.70    1.47 
  15   0   4   11.85    1.77 
  15   0   5    0.00    1.36 
  15   0   6    1.08    1.02 
  15   0   7    0.00    1.28 
  15   0   8    1.00    1.31 
  15   0   9    1.44    1.54 
  15  -1 -12    0.83    0.65 
  15  -1 -11    2.29    1.11 
  15  -1 -10    0.25    1.34 
  15  -1  -9    0.43    0.77 
  15  -1  -8    0.47    0.63 
  15  -1  -7    0.54    0.72 
  15  -1  -6   20.54    1.03 
  15  -1  -5    2.13    0.81 
  15  -1  -4    5.07    1.05 
  15  -1  -3    3.36    0.82 
  15  -1  -2    4.92    0.70 
  15  -1  -1    4.43    1.01 
  15  -1   0    5.21    0.68 
  15  -1   1    2.50    1.11 
  15  -1   2    2.73    0.76 
  15  -1   3    5.15    1.01 
  15  -1   4    2.44    1.09 
  15  -1   5    0.00    0.93 
  15  -1   6    0.44    0.99 
  15  -1   7    0.48    0.91 
  15  -1   8    0.01    0.84 
  15  -1   9    0.33    1.01 
  15  -2 -11    0.31    1.24 
  15  -2 -10    6.22    1.07 
  15  -2  -9    1.20    0.88 
  15  -2  -8    1.81    0.68 
  15  -2  -7    2.89    0.84 
  15  -2  -6    1.53    0.62 
  15  -2  -5    8.03    0.86 
  15  -2  -4    0.00    0.65 
  15  -2  -3    3.63    0.48 
  15  -2  -2    0.06    0.52 
  15  -2  -1    8.49    0.91 
  15  -2   0    4.20    0.61 
  15  -2   1    0.00    1.06 
  15  -2   2    1.44    0.78 
  15  -2   3    0.75    1.13 
  15  -2   4   16.06    1.42 
  15  -2   5    6.69    1.25 
  15  -2   6    0.00    1.42 
  15  -2   7    2.66    1.18 
  15  -2   8    0.05    1.35 
  15  -3 -11    0.00    1.31 
  15  -3 -10    0.40    0.96 
  15  -3  -9    0.03    1.02 
  15  -3  -8    0.07    0.46 
  15  -3  -7    3.67    0.71 
  15  -3  -6    5.72    0.65 
  15  -3  -5    0.00    0.55 
  15  -3  -4    0.00    0.75 
  15  -3  -3    0.17    0.87 
  15  -3  -2    1.26    0.67 
  15  -3  -1    8.93    1.11 
  15  -3   0    0.54    0.37 
  15  -3   1    1.13    1.25 
  15  -3   2    5.34    0.92 
  15  -3   3    9.19    1.20 
  15  -3   4    0.35    1.19 
  15  -3   5    2.06    1.26 
  15  -3   6    0.43    1.46 
  15  -3   7    5.60    1.24 
  15  -3   8    0.11    1.46 
  15  -4 -11    0.88    1.26 
  15  -4 -10    1.10    0.93 
  15  -4  -9    4.08    0.83 
  15  -4  -8    0.99    0.57 
  15  -4  -7    3.72    0.76 
  15  -4  -6    0.18    0.47 
  15  -4  -5    2.86    1.18 
  15  -4  -4    2.38    0.96 
  15  -4  -3    5.22    1.11 
  15  -4  -2    2.22    0.80 
  15  -4  -1   11.30    1.05 
  15  -4   0    0.16    0.30 
  15  -4   1    0.18    0.40 
  15  -4   2    0.00    0.63 
  15  -4   3    0.49    1.07 
  15  -4   4    0.41    1.06 
  15  -4   5    0.00    1.12 
  15  -4   6    0.00    1.32 
  15  -4   7    4.57    1.31 
  15  -4   8    0.68    1.55 
  15  -5 -10    2.23    0.92 
  15  -5  -9    1.23    0.68 
  15  -5  -8    0.76    0.50 
  15  -5  -7    1.63    0.73 
  15  -5  -6    3.67    1.05 
  15  -5  -5    1.99    0.92 
  15  -5  -4    4.30    1.15 
  15  -5  -3    1.18    1.27 
  15  -5  -2    1.80    0.86 
  15  -5  -1    8.97    1.02 
  15  -5   0    0.30    0.26 
  15  -5   1    4.65    0.84 
  15  -5   2    0.22    0.57 
  15  -5   3    5.59    1.24 
  15  -5   4    1.39    1.09 
  15  -5   5    0.00    1.04 
  15  -5   6    1.69    1.54 
  15  -5   7    0.00    0.96 
  15  -6  -9    2.22    0.72 
  15  -6  -8    0.70    0.47 
  15  -6  -7    2.33    0.87 
  15  -6  -6    0.11    1.03 
  15  -6  -5    2.08    1.05 
  15  -6  -4    1.98    1.02 
  15  -6  -3    4.26    1.03 
  15  -6  -2    4.11    0.92 
  15  -6  -1    2.49    0.73 
  15  -6   0    1.39    0.77 
  15  -6   1    1.00    0.55 
  15  -6   2    2.04    0.76 
  15  -6   3    0.00    1.16 
  15  -6   4    0.00    1.08 
  15  -6   5    0.61    1.28 
  15  -6   6    0.00    1.26 
  15  -7  -8    2.99    0.87 
  15  -7  -7    3.59    0.90 
  15  -7  -6    3.06    1.07 
  15  -7  -5    1.81    1.38 
  15  -7  -4    7.33    1.51 
  15  -7  -3    0.22    1.36 
  15  -7  -2    0.00    0.66 
  15  -7  -1    1.02    0.47 
  15  -7   0    0.22    0.43 
  15  -7   1    0.28    0.36 
  15  -7   2    0.00    0.93 
  15  -7   3    0.46    1.09 
  15  -7   4    0.00    1.06 
  15  -7   5    0.00    1.06 
  15  -8  -6    2.99    1.27 
  15  -8  -5    2.83    1.07 
  15  -8  -4    4.08    1.09 
  15  -8  -3    2.22    1.51 
  15  -8  -2    5.40    1.14 
  15  -8  -1    0.71    0.39 
  15  -8   0    2.59    0.96 
  15  -8   1    0.77    0.43 
  15  -8   2    2.94    1.00 
  15  -8   3    0.00    1.12 
  15  -9  -3    1.21    0.56 
  15  -9  -2    0.00    0.81 
  15  -9  -1    2.53    0.45 
  15  -9   0    0.77    0.60 
  16   0 -11    0.35    1.66 
  16   0 -10    3.33    1.81 
  16   0  -9    0.00    1.16 
  16   0  -8    0.27    0.91 
  16   0  -7    0.00    1.11 
  16   0  -6   11.08    1.39 
  16   0  -5    0.00    1.73 
  16   0  -4   11.44    1.52 
  16   0  -3    0.57    1.35 
  16   0  -2   37.73    1.86 
  16   0  -1    0.84    1.50 
  16   0   0    7.66    1.28 
  16   0   1    0.64    1.54 
  16   0   2   12.71    1.58 
  16   0   3    0.33    1.59 
  16   0   4    0.00    1.44 
  16   0   5    1.58    1.49 
  16   0   6    6.84    1.87 
  16   0   7    1.07    1.68 
  16   0   8    1.59    1.45 
  16  -1 -11    0.00    1.14 
  16  -1 -10    6.67    1.15 
  16  -1  -9    0.00    0.81 
  16  -1  -8    1.09    0.68 
  16  -1  -7    0.49    0.78 
  16  -1  -6   10.42    0.85 
  16  -1  -5    0.48    0.80 
  16  -1  -4    5.48    0.82 
  16  -1  -3    2.89    0.89 
  16  -1  -2    0.46    0.69 
  16  -1  -1    3.82    1.09 
  16  -1   0    5.63    0.75 
  16  -1   1    4.76    1.21 
  16  -1   2    9.25    1.07 
  16  -1   3    2.86    1.08 
  16  -1   4   10.76    1.21 
  16  -1   5    1.07    1.06 
  16  -1   6    0.99    1.43 
  16  -1   7    0.73    1.07 
  16  -1   8    4.17    1.66 
  16  -2 -11    0.00    1.36 
  16  -2 -10    0.44    0.83 
  16  -2  -9    2.09    1.00 
  16  -2  -8    0.69    0.66 
  16  -2  -7    3.84    0.91 
  16  -2  -6    4.86    0.76 
  16  -2  -5    0.90    0.76 
  16  -2  -4    0.00    0.69 
  16  -2  -3    0.73    1.18 
  16  -2  -2    8.68    0.67 
  16  -2  -1    2.09    0.94 
  16  -2   0    4.08    0.65 
  16  -2   1    3.37    1.10 
  16  -2   2    1.07    1.01 
  16  -2   3    9.19    1.37 
  16  -2   4    1.45    1.37 
  16  -2   5    2.82    1.27 
  16  -2   6    3.67    1.48 
  16  -2   7    3.34    1.24 
  16  -2   8    0.00    1.27 
  16  -3 -10    0.61    0.86 
  16  -3  -9    0.00    0.99 
  16  -3  -8    0.13    0.59 
  16  -3  -7    2.84    0.81 
  16  -3  -6    2.47    0.59 
  16  -3  -5    8.59    1.19 
  16  -3  -4    0.00    0.85 
  16  -3  -3    3.88    1.12 
  16  -3  -2    1.59    0.90 
  16  -3  -1    4.52    1.77 
  16  -3   0    0.12    0.51 
  16  -3   1    2.16    1.69 
  16  -3   2    0.69    1.05 
  16  -3   3    0.97    1.27 
  16  -3   4    1.70    1.23 
  16  -3   5    1.37    1.20 
  16  -3   6    0.27    1.48 
  16  -3   7    2.36    1.17 
  16  -4 -10    0.00    1.45 
  16  -4  -9    3.64    0.85 
  16  -4  -8    0.29    0.50 
  16  -4  -7    8.36    1.30 
  16  -4  -6    2.34    1.04 
  16  -4  -5    1.14    0.91 
  16  -4  -4    2.93    0.98 
  16  -4  -3    1.94    1.02 
  16  -4  -2    3.17    0.73 
  16  -4  -1    1.07    0.80 
  16  -4   0    1.06    0.65 
  16  -4   1    0.71    0.88 
  16  -4   2    0.25    0.82 
  16  -4   3    6.19    1.36 
  16  -4   4    0.75    1.07 
  16  -4   5    1.64    1.25 
  16  -4   6    0.70    1.58 
  16  -4   7    8.42    1.44 
  16  -5  -9    0.93    0.86 
  16  -5  -8    4.17    1.07 
  16  -5  -7    4.11    0.89 
  16  -5  -6    0.00    1.63 
  16  -5  -5    5.11    1.17 
  16  -5  -4    1.58    0.95 
  16  -5  -3   10.06    1.31 
  16  -5  -2    0.43    0.65 
  16  -5  -1    8.71    1.13 
  16  -5   0    1.39    0.58 
  16  -5   1    8.58    1.05 
  16  -5   2    1.75    0.71 
  16  -5   3    0.05    1.12 
  16  -5   4    0.00    1.21 
  16  -5   5    0.83    1.38 
  16  -5   6    0.00    1.29 
  16  -6  -8    2.92    0.77 
  16  -6  -7    4.49    0.94 
  16  -6  -6    5.96    1.23 
  16  -6  -5    2.72    0.98 
  16  -6  -4    7.17    1.12 
  16  -6  -3    1.81    1.35 
  16  -6  -2    3.52    0.84 
  16  -6  -1    1.04    0.52 
  16  -6   0    0.34    0.51 
  16  -6   1    1.73    0.53 
  16  -6   2    0.00    0.82 
  16  -6   3    0.00    1.11 
  16  -6   4    1.59    1.03 
  16  -6   5    0.00    1.10 
  16  -7  -7    1.15    0.77 
  16  -7  -6    5.51    1.23 
  16  -7  -5    3.88    1.12 
  16  -7  -4    2.49    0.98 
  16  -7  -3    2.28    1.01 
  16  -7  -2    1.22    0.91 
  16  -7  -1    0.76    0.50 
  16  -7   0    0.68    0.45 
  16  -7   1    0.59    0.41 
  16  -7   2    0.00    1.22 
  16  -7   3    0.00    1.13 
  16  -7   4    0.00    1.25 
  16  -8  -5    1.09    0.59 
  16  -8  -4    4.22    1.07 
  16  -8  -3    2.65    1.04 
  16  -8  -2    3.30    0.95 
  16  -8  -1    0.87    0.48 
  16  -8   0    0.82    0.55 
  16  -8   1    1.23    0.52 
  16  -8   2    1.03    0.74 
  17   0 -10    0.00    1.97 
  17   0  -9    0.90    1.32 
  17   0  -8    5.13    1.28 
  17   0  -7    0.00    1.10 
  17   0  -6   18.02    1.55 
  17   0  -5    0.34    1.22 
  17   0  -4    4.58    1.60 
  17   0  -3    0.68    1.47 
  17   0  -2    4.13    1.50 
  17   0  -1    0.00    1.68 
  17   0   0    1.24    0.83 
  17   0   1    1.66    1.78 
  17   0   2    1.12    1.40 
  17   0   3    0.00    1.55 
  17   0   4    1.68    1.77 
  17   0   5    0.00    1.48 
  17   0   6    2.40    1.83 
  17   0   7    0.27    1.44 
  17  -1 -10    0.99    0.97 
  17  -1  -9    0.83    0.88 
  17  -1  -8    3.62    0.80 
  17  -1  -7    0.29    0.84 
  17  -1  -6    8.21    0.87 
  17  -1  -5    0.39    0.84 
  17  -1  -4    7.98    0.97 
  17  -1  -3    2.41    0.99 
  17  -1  -2   14.71    1.00 
  17  -1  -1    2.00    1.07 
  17  -1   0    2.13    0.60 
  17  -1   1    0.00    1.09 
  17  -1   2   16.39    1.19 
  17  -1   3    0.00    1.08 
  17  -1   4    7.56    1.36 
  17  -1   5    0.00    1.17 
  17  -1   6    3.90    1.47 
  17  -1   7    1.38    1.14 
  17  -2 -10    2.41    1.12 
  17  -2  -9    0.00    0.90 
  17  -2  -8    4.11    0.83 
  17  -2  -7    0.00    0.79 
  17  -2  -6   18.82    1.03 
  17  -2  -5    0.00    1.25 
  17  -2  -4    3.54    1.42 
  17  -2  -3    4.48    1.40 
  17  -2  -2    1.66    1.15 
  17  -2  -1   13.61    1.15 
  17  -2   0    0.25    0.45 
  17  -2   1    5.31    1.28 
  17  -2   2    1.26    1.06 
  17  -2   3    0.00    1.36 
  17  -2   4    4.02    1.38 
  17  -2   5    0.22    1.32 
  17  -2   6    1.88    1.61 
  17  -2   7    0.00    1.15 
  17  -3 -10    0.47    0.63 
  17  -3  -9    2.42    1.08 
  17  -3  -8    0.92    0.69 
  17  -3  -7    7.47    1.37 
  17  -3  -6    0.00    1.46 
  17  -3  -5    5.12    1.33 
  17  -3  -4    1.59    1.26 
  17  -3  -3    3.38    1.36 
  17  -3  -2    2.63    1.22 
  17  -3  -1    0.64    1.79 
  17  -3   0    0.24    0.83 
  17  -3   1    2.37    1.70 
  17  -3   2    3.51    1.19 
  17  -3   3    9.52    1.52 
  17  -3   4    3.67    1.36 
  17  -3   5    5.15    1.36 
  17  -3   6    0.69    1.51 
  17  -4  -9    0.00    1.34 
  17  -4  -8    0.33    0.70 
  17  -4  -7    0.46    0.76 
  17  -4  -6    4.03    1.13 
  17  -4  -5    5.38    1.07 
  17  -4  -4    0.00    0.99 
  17  -4  -3   11.62    1.38 
  17  -4  -2    0.30    0.78 
  17  -4  -1   10.01    1.68 
  17  -4   0    0.48    0.54 
  17  -4   1   10.46    1.97 
  17  -4   2    0.00    1.03 
  17  -4   3    5.23    1.51 
  17  -4   4    0.46    1.40 
  17  -4   5    0.11    1.58 
  17  -4   6    0.00    1.46 
  17  -5  -8    0.64    1.26 
  17  -5  -7    5.10    1.09 
  17  -5  -6    0.00    1.06 
  17  -5  -5    0.84    0.97 
  17  -5  -4    0.96    0.98 
  17  -5  -3    6.33    1.12 
  17  -5  -2    2.31    0.79 
  17  -5  -1    2.02    0.62 
  17  -5   0    2.47    0.87 
  17  -5   1    0.63    0.53 
  17  -5   2    0.00    1.07 
  17  -5   3    0.00    1.20 
  17  -5   4    0.41    1.18 
  17  -5   5    0.33    1.08 
  17  -6  -7    2.07    0.84 
  17  -6  -6    0.00    1.55 
  17  -6  -5    1.45    1.40 
  17  -6  -4    5.10    1.09 
  17  -6  -3    4.28    1.07 
  17  -6  -2    5.93    1.04 
  17  -6  -1    3.19    0.84 
  17  -6   0    0.87    0.53 
  17  -6   1    4.41    1.01 
  17  -6   2    0.76    1.19 
  17  -6   3    1.87    1.42 
  17  -6   4    0.00    1.11 
  17  -7  -6    2.91    1.79 
  17  -7  -5    2.97    0.92 
  17  -7  -4    3.90    0.99 
  17  -7  -3    1.93    1.05 
  17  -7  -2    5.08    1.06 
  17  -7  -1    1.98    0.57 
  17  -7   0    3.33    0.89 
  17  -7   1    0.97    0.52 
  17  -7   2    0.00    1.22 
  17  -8  -2    1.19    1.55 
  18   0 -10    2.64    1.02 
  18   0  -9    0.86    1.41 
  18   0  -8    0.97    0.99 
  18   0  -7    0.38    1.17 
  18   0  -6    6.56    1.09 
  18   0  -5    0.00    1.30 
  18   0  -4    1.83    1.28 
  18   0  -3    0.93    1.41 
  18   0  -2    2.71    1.36 
  18   0  -1    2.68    1.73 
  18   0   0    6.08    1.24 
  18   0   1    0.00    1.76 
  18   0   2   35.72    2.24 
  18   0   3    0.00    1.69 
  18   0   4    3.99    1.81 
  18   0   5    2.20    2.21 
  18   0   6    0.00    2.61 
  18  -1 -10    0.99    0.65 
  18  -1  -9    1.73    0.88 
  18  -1  -8   15.91    1.28 
  18  -1  -7    0.00    0.82 
  18  -1  -6    8.88    1.02 
  18  -1  -5    0.52    0.90 
  18  -1  -4    8.68    1.05 
  18  -1  -3    4.00    0.96 
  18  -1  -2    9.91    1.11 
  18  -1  -1    2.39    1.10 
  18  -1   0    2.52    0.65 
  18  -1   1    1.10    1.14 
  18  -1   2    1.64    1.13 
  18  -1   3    0.00    1.54 
  18  -1   4    0.53    1.33 
  18  -1   5    0.97    1.27 
  18  -1   6    0.00    1.55 
  18  -2  -9    0.00    0.96 
  18  -2  -8    1.18    0.72 
  18  -2  -7    2.45    1.22 
  18  -2  -6    2.59    1.48 
  18  -2  -5    2.97    1.30 
  18  -2  -4    0.00    1.33 
  18  -2  -3    3.76    1.52 
  18  -2  -2    1.80    1.22 
  18  -2  -1    2.35    1.75 
  18  -2   0    6.09    0.77 
  18  -2   1    0.00    1.64 
  18  -2   2   18.12    1.46 
  18  -2   3    0.00    1.41 
  18  -2   4    0.00    1.50 
  18  -2   5    0.00    1.31 
  18  -2   6    0.55    0.69 
  18  -3  -9    5.12    1.54 
  18  -3  -8    3.90    1.44 
  18  -3  -7    0.79    1.28 
  18  -3  -6    1.39    1.52 
  18  -3  -5    0.00    1.27 
  18  -3  -4    0.00    1.28 
  18  -3  -3    3.08    1.70 
  18  -3  -2    7.36    1.39 
  18  -3  -1    7.24    2.47 
  18  -3   0    1.57    1.07 
  18  -3   1    3.33    2.87 
  18  -3   2    0.84    1.07 
  18  -3   3    1.93    1.46 
  18  -3   4    2.89    1.42 
  18  -3   5    6.95    1.48 
  18  -4  -8    0.00    1.11 
  18  -4  -7    2.73    1.48 
  18  -4  -6    4.05    1.22 
  18  -4  -5    4.89    1.23 
  18  -4  -4    1.07    0.97 
  18  -4  -3    6.93    1.76 
  18  -4  -2    0.80    1.21 
  18  -4  -1    0.14    2.06 
  18  -4   0    0.09    0.91 
  18  -4   1    2.85    2.12 
  18  -4   2    6.48    1.85 
  18  -4   3    0.00    1.40 
  18  -4   4    0.67    1.40 
  18  -4   5    0.00    1.39 
  18  -5  -7    2.94    0.87 
  18  -5  -6    0.00    1.20 
  18  -5  -5    0.00    1.42 
  18  -5  -4    4.33    1.18 
  18  -5  -3    5.69    1.14 
  18  -5  -2    1.29    0.92 
  18  -5  -1    7.83    1.53 
  18  -5   0    1.40    0.68 
  18  -5   1    7.36    1.87 
  18  -5   2    1.98    1.21 
  18  -5   3    0.86    1.84 
  18  -5   4    4.13    2.29 
  18  -6  -6    3.18    1.08 
  18  -6  -5    2.44    0.97 
  18  -6  -4    0.00    0.95 
  18  -6  -3    1.17    1.19 
  18  -6  -2    2.02    1.00 
  18  -6  -1    0.44    0.37 
  18  -6   0    1.04    0.60 
  18  -6   1    3.14    0.73 
  18  -6   2    0.79    1.13 
  18  -6   3    1.17    1.51 
  18  -7  -4    9.10    1.21 
  18  -7  -3    1.43    0.69 
  18  -7  -2    4.23    1.03 
  18  -7  -1    1.37    0.38 
  18  -7   0    0.36    0.46 
  19   0  -9    0.00    1.33 
  19   0  -8    5.29    1.31 
  19   0  -7    0.78    1.34 
  19   0  -6    0.00    1.59 
  19   0  -5    0.38    1.31 
  19   0  -4   14.64    1.59 
  19   0  -3    2.62    1.61 
  19   0  -2   13.17    2.09 
  19   0  -1    0.00    1.78 
  19   0   0    2.50    0.95 
  19   0   1    2.21    1.88 
  19   0   2    0.00    1.45 
  19   0   3    0.00    1.72 
  19   0   4    3.47    3.22 
  19   0   5    0.86    2.27 
  19  -1  -9    0.22    0.90 
  19  -1  -8    1.07    0.72 
  19  -1  -7    0.00    1.05 
  19  -1  -6    0.20    1.44 
  19  -1  -5    1.43    1.22 
  19  -1  -4    2.84    1.36 
  19  -1  -3    6.21    1.90 
  19  -1  -2    4.24    1.26 
  19  -1  -1    7.61    1.49 
  19  -1   0   10.21    1.01 
  19  -1   1    0.00    1.47 
  19  -1   2    7.80    1.33 
  19  -1   3    0.00    1.39 
  19  -1   4    0.00    1.50 
  19  -1   5    0.00    1.29 
  19  -2  -8    1.27    1.18 
  19  -2  -7    1.92    1.27 
  19  -2  -6    0.00    1.48 
  19  -2  -5    1.77    1.49 
  19  -2  -4    5.32    1.42 
  19  -2  -3    3.03    1.55 
  19  -2  -2    6.89    1.64 
  19  -2  -1    5.40    1.90 
  19  -2   0    0.60    0.94 
  19  -2   1    0.00    1.77 
  19  -2   2    0.00    1.11 
  19  -2   3    0.00    1.56 
  19  -2   4    0.11    1.46 
  19  -2   5    2.99    1.49 
  19  -3  -8    0.28    1.09 
  19  -3  -7    0.39    1.20 
  19  -3  -6    0.68    1.56 
  19  -3  -5    1.35    1.43 
  19  -3  -4    1.39    1.43 
  19  -3  -3    3.79    1.67 
  19  -3  -2    0.00    1.24 
  19  -3  -1    8.04    2.55 
  19  -3   0    3.37    1.38 
  19  -3   1    0.00    2.93 
  19  -3   2    0.16    1.73 
  19  -3   3    0.01    1.42 
  19  -3   4    3.94    1.89 
  19  -4  -7    0.00    1.55 
  19  -4  -6    0.32    1.75 
  19  -4  -5    0.00    1.90 
  19  -4  -4    1.73    1.60 
  19  -4  -3    2.48    1.64 
  19  -4  -2    0.00    1.79 
  19  -4  -1    0.00    2.16 
  19  -4   0    0.41    0.98 
  19  -4   1    5.53    2.23 
  19  -4   2    0.98    1.66 
  19  -4   3    3.06    2.59 
  19  -5  -6    3.48    1.14 
  19  -5  -5    1.60    0.93 
  19  -5  -4    1.38    1.13 
  19  -5  -3    8.96    1.51 
  19  -5  -2    0.00    0.91 
  19  -5  -1   11.86   24.22 
  19  -5   0    0.02    0.96 
  19  -5   1    0.00   35.86 
  19  -5   2    2.42    1.87 
  19  -6  -4    0.45    0.97 
  19  -6  -3    0.00    1.15 
  19  -6  -2    0.11    0.94 
  19  -6  -1    1.01    0.43 
  19  -6   0    0.50    0.50 
  20   0  -8    3.35    1.21 
  20   0  -7    0.56    1.28 
  20   0  -6    3.12    1.57 
  20   0  -5    0.00    2.56 
  20   0  -4    9.14    1.61 
  20   0  -3    0.97    1.61 
  20   0  -2    2.93    1.43 
  20   0  -1    1.26    2.02 
  20   0   0    2.05    1.02 
  20   0   1    0.00    2.34 
  20   0   2    3.35    2.59 
  20   0   3    0.29    2.95 
  20   0   4    0.98    1.06 
  20  -1  -8    0.46    1.15 
  20  -1  -7    1.11    1.12 
  20  -1  -6    0.00    1.40 
  20  -1  -5    0.48    1.28 
  20  -1  -4    4.90    1.37 
  20  -1  -3    3.30    1.52 
  20  -1  -2    6.53    1.49 
  20  -1  -1    0.00    1.86 
  20  -1   0    6.68    0.91 
  20  -1   1    1.38    1.88 
  20  -1   2    3.07    1.24 
  20  -1   3    0.25    1.46 
  20  -1   4    2.48    0.94 
  20  -2  -7    1.26    1.20 
  20  -2  -6    4.76    1.70 
  20  -2  -5    3.42    1.37 
  20  -2  -4    7.87    1.67 
  20  -2  -3   11.88    1.77 
  20  -2  -2    1.76    1.29 
  20  -2  -1    4.98    2.15 
  20  -2   0    4.33    1.36 
  20  -2   1    0.69    2.16 
  20  -2   2    0.29    1.70 
  20  -2   3    0.00    1.48 
  20  -3  -7    5.52    1.00 
  20  -3  -6    0.00    1.56 
  20  -3  -5    5.03    1.53 
  20  -3  -4    0.00    1.56 
  20  -3  -3    2.42    1.64 
  20  -3  -2    3.05    1.71 
  20  -3  -1    2.22    2.46 
  20  -3   0    1.29    1.09 
  20  -3   1    0.00    2.85 
  20  -3   2    0.00    1.75 
  20  -3   3    5.17    2.31 
  20  -4  -6    1.66    1.79 
  20  -4  -5    1.74    1.60 
  20  -4  -4    1.84    1.61 
  20  -4  -3   17.50    2.58 
  20  -4  -2    0.00    1.64 
  20  -4  -1    7.35    2.31 
  20  -4   0    1.02    1.17 
  20  -4   1    0.00    2.35 
  20  -4   2    0.58    0.91 
  20  -5  -4    0.48    2.20 
  20  -5  -3    0.53    0.94 
  20  -5  -2    0.66    1.85 
  20  -5  -1    1.58    1.81 
  20  -5   0    0.93    1.12 
  21   0  -6    1.02    3.15 
  21   0  -5    0.85    2.66 
  21   0  -4    5.25    4.71 
  21   0  -3    0.54    4.31 
  21   0  -2    7.72    3.78 
  21   0  -1    0.63   27.63 
  21   0   0    4.67    1.20 
  21   0   1    0.00   19.12 
  21   0   2    1.24    2.50 
  21  -1  -6    7.75    1.52 
  21  -1  -5    2.69    1.35 
  21  -1  -4   13.98    1.67 
  21  -1  -3    3.55    1.57 
  21  -1  -2    3.47    1.37 
  21  -1  -1    2.51    2.20 
  21  -1   0    0.72    0.98 
  21  -1   1    2.24    2.53 
  21  -1   2    0.00    1.93 
  21  -2  -5    4.12    1.63 
  21  -2  -4    2.92    1.61 
  21  -2  -3    3.40    1.66 
  21  -2  -2    3.88    1.71 
  21  -2  -1    0.67    2.03 
  21  -2   0    3.03    1.26 
  21  -2   1    1.66    2.07 
  21  -3  -5    0.41    0.91 
  21  -3  -4    1.27    1.34 
  21  -3  -3    5.83    2.21 
  21  -3  -2    3.72    1.75 
  21  -3  -1    0.62    0.85 
  21  -3   0    0.00    1.12 
  22   0  -3    0.59    1.44 
  22   0  -2    1.06    3.65 
  22   0  -1    0.92    1.27 
  22  -1  -3    0.77    1.01 
  22  -1  -2    2.83    2.16 
   0   0   0    0.00    0.00 
; 
_shelx_hkl_checksum   10739 

###END

  
